# Supplementary material for: Psychological interventions for positive symptoms in schizophrenia: protocol for a network meta-analysis of randomised controlled trials
Source: PubMed Central journal article supplement — BMJ Open. 2018 Mar 14;8(3):e019280. doi: 10.1136/bmjopen-2017-019280 (PMC5857696; doi:10.1136/bmjopen-2017-019280), 2018-03-14
Supplement: bmjopen-2017-019280.draft_revisions.pdf [file bmjopen-2017-019280.draft_revisions.pdf]

# BMJ Open

BMJ Open is committed to open peer review. As part of this commitment we make the peer review history of every article we publish publicly available.

When an article is published we post the peer reviewers' comments and the authors' responses online. We also post the versions of the paper that were used during peer review. These are the versions that the peer review comments apply to.

The versions of the paper that follow are the versions that were submitted during the peer review process. They are not the versions of record or the final published versions. They should not be cited or distributed as the published version of this manuscript.

BMJ Open is an open access journal and the full, final, typeset and author-corrected version of record of the manuscript is available on our site with no access controls, subscription charges or pay-per-view fees (<http://bmjopen.bmj.com>).

If you have any questions on BMJ Open's open peer review process please email [info.bmjopen@bmj.com](mailto:info.bmjopen@bmj.com)

# BMJ Open

## Psychological interventions for positive symptoms in schizophrenia: protocol for a network meta-analysis of randomized evidence

|                               |                                                                                                                                                                                                                                                                                                                                                                                                                                                                                                                                                                                                                                                                                                                                                                                                                                                                                                                                                                                                             |
|-------------------------------|-------------------------------------------------------------------------------------------------------------------------------------------------------------------------------------------------------------------------------------------------------------------------------------------------------------------------------------------------------------------------------------------------------------------------------------------------------------------------------------------------------------------------------------------------------------------------------------------------------------------------------------------------------------------------------------------------------------------------------------------------------------------------------------------------------------------------------------------------------------------------------------------------------------------------------------------------------------------------------------------------------------|
| Journal:                      | <i>BMJ Open</i>                                                                                                                                                                                                                                                                                                                                                                                                                                                                                                                                                                                                                                                                                                                                                                                                                                                                                                                                                                                             |
| Manuscript ID                 | bmjopen-2017-019280                                                                                                                                                                                                                                                                                                                                                                                                                                                                                                                                                                                                                                                                                                                                                                                                                                                                                                                                                                                         |
| Article Type:                 | Protocol                                                                                                                                                                                                                                                                                                                                                                                                                                                                                                                                                                                                                                                                                                                                                                                                                                                                                                                                                                                                    |
| Date Submitted by the Author: | 22-Aug-2017                                                                                                                                                                                                                                                                                                                                                                                                                                                                                                                                                                                                                                                                                                                                                                                                                                                                                                                                                                                                 |
| Complete List of Authors:     | <p>Bighelli, Irene; Klinikum rechts der Isar der Technischen Universität München, Department of Psychiatry and Psychotherapy<br/> Salanti, Georgia; University of Bern, Institute of Social and Preventive Medicine (ISPM)<br/> Reitmeir, Cornelia; Klinikum rechts der Isar der Technischen Universität München, Department of Psychiatry and Psychotherapy<br/> Wallis, Sofia; Klinikum rechts der Isar der Technischen Universität München, Department of Psychiatry and Psychotherapy<br/> Barbui, Corrado; University of Verona, WHO Collaborating Centre for Research and Training in Mental Health and Service Evaluation, Department of Neuroscience, Biomedicine and Movement Sciences, Section of Psychiatry<br/> Furukawa, Toshi; Kyoto University, Department of Health Promotion and Human Behavior, Graduate School of Medicine and School of Public Health<br/> Leucht, Stefan; Klinikum rechts der Isar der Technischen Universität München, Department of Psychiatry and Psychotherapy</p> |
| Keywords:                     | Schizophrenia & psychotic disorders < PSYCHIATRY, Adult psychiatry < PSYCHIATRY, Psychological interventions, Network Meta-Analysis, Psychotherapy                                                                                                                                                                                                                                                                                                                                                                                                                                                                                                                                                                                                                                                                                                                                                                                                                                                          |
|                               |                                                                                                                                                                                                                                                                                                                                                                                                                                                                                                                                                                                                                                                                                                                                                                                                                                                                                                                                                                                                             |

SCHOLARONE™  
Manuscripts

# Psychological interventions for positive symptoms in schizophrenia: protocol for a network meta-analysis of randomized evidence

Irene Bighelli<sup>1\*</sup>, Georgia Salanti<sup>2</sup>, Cornelia Reitmeir<sup>1</sup>, Sofia Wallis<sup>1</sup>, Corrado Barbui<sup>3</sup>, Toshi A. Furukawa<sup>4</sup>, Stefan Leucht<sup>1</sup>

<sup>1</sup> Department of Psychiatry and Psychotherapy, Klinikum rechts der Isar, Technical University of Munich, Germany

<sup>2</sup> Institute of Social and Preventive Medicine (ISPM), University of Bern, Switzerland

<sup>3</sup> WHO Collaborating Centre for Research and Training in Mental Health and Service Evaluation, Department of Neuroscience, Biomedicine and Movement Sciences, Section of Psychiatry, University of Verona, Italy

<sup>4</sup> Department of Health Promotion and Human Behavior, Kyoto University Graduate School of Medicine / School of Public Health, Japan

\*Corresponding author

Department of Psychiatry and Psychotherapy  
Klinikum rechts der Isar, Technische Universität München  
Ismaningerstr. 22, 81675 München, Germany  
E-mail: [irene.bighelli@tum.de](mailto:irene.bighelli@tum.de)

[GS: georgia.salanti@ispm.unibe.ch](mailto:gsalanti@ispm.unibe.ch)

[CR: cornelia.reitmeir@tum.de](mailto:cornelia.reitmeir@tum.de)

[SW: sofia.wallis@tum.de](mailto:sofia.wallis@tum.de)

[CB: corrado.barbui@univr.it](mailto:corrado.barbui@univr.it)

[TAF: furukawa@kuhp.kyoto-u.ac.jp](mailto:furukawa@kuhp.kyoto-u.ac.jp)

[SL: stefan.leucht@tum.de](mailto:stefan.leucht@tum.de)

## ABSTRACT

### Introduction

There is rising awareness that we need multi-disciplinary approaches integrating psychological treatments for schizophrenia, but a comprehensive evidence base on their relative efficacy is lacking. We will conduct a network meta-analysis (NMA), integrating direct and indirect comparisons from randomised controlled trials (RCTs) to rank psychological treatments for schizophrenia according to their efficacy, acceptability and tolerability.

### Methods and analysis

We will include all RCTs comparing a psychological treatment aimed at positive symptoms of schizophrenia with another psychological intervention or with a no treatment condition (waiting list, treatment as usual). We will include studies on adult patients with schizophrenia, excluding specific subpopulations (e.g. prodromal or first episode patients). Primary outcome will be the change in positive symptoms on a published rating scale. Secondary outcomes will be acceptability (dropout), change in overall and negative symptoms of schizophrenia, response, relapse, adherence, depression, quality of life, functioning and adverse events. Published and unpublished studies will be sought through database searches, trial registries and websites. Study selection and data extraction will be conducted by at least two independent reviewers. We will conduct random-effects NMA to synthesize all evidence for each outcome and obtain a comprehensive ranking of all treatments. NMA will be conducted in Stata and R within a frequentist framework. The risk of bias in studies will be evaluated using the Cochrane Risk of Bias tool and the credibility of the evidence will be evaluated using an adaptation of the GRADE framework to NMA, recommended by the Cochrane guidance. Subgroup and sensitivity analyses will be conducted to assess the robustness of the findings.

### Ethics and dissemination

No ethical issues are foreseen. Results from this study will be published in peer-reviewed journals and presented at relevant conferences.

**PROSPERO registration number:** CRD42017067795

### STRENGTHS AND LIMITATIONS OF THIS STUDY

- We will conduct a random-effects network meta-analysis to synthesize all available published or unpublished randomized controlled trials for each pre-specified outcome, and obtain a comprehensive ranking of all treatments.
- This will be the first network meta-analysis on psychological treatments for schizophrenia; the findings from this study have the potential to inform and influence clinical decision-making and guideline development.
- The risk of heterogeneity and inconsistency is high, given the different psychological interventions that will be included: however, we try to control variability by carefully framing the inclusion criteria about population and interventions, and we will evaluate consistency employing local as well as global methods.
- The limitations of primary studies will be addressed with the Cochrane risk of bias tool and the quality of evidence for network estimates will be assessed with an appropriate

adaptation of the GRADE framework; these approaches are considered the gold standard for critical appraisal of evidence quality.

## INTRODUCTION

Schizophrenia is a debilitating, and often life-long disorder that ranks among the top 20 causes of disability according to the World Health Report (1). Although pharmacological interventions have been the mainstay of treatment for schizophrenia, antipsychotics have a number of limitations (limited response, high incidence of disabling side effects, poor adherence to treatment) (2) and are problematic in many situations (such as medical comorbidities, tolerability problems and pregnancy). Besides, there has been growing recognition of the importance of psychological processes in psychosis, both as contributors to onset and persistence, and in terms of the negative psychological impact of a diagnosis of schizophrenia on the individual's well-being, psychosocial functioning and life opportunities. Psychological interventions for psychosis and schizophrenia have been developed to address these aspects, and, in accordance with guidelines from the National Institute for Health and Care Excellence in the United Kingdom (3) and the Schizophrenia Patient Outcomes Research Team in the United States (4), psychological treatments are widely regarded as a necessary intervention for schizophrenia.

A broad range of interventions that can be defined as "psychological" have been studied in the treatment of schizophrenia. These interventions can be provided at different stages of the illness and address different aspects, like social and cognitive functioning, adherence to medication and symptoms of schizophrenia. Table 1 presents the panorama of existing systematic reviews of randomized controlled trials that have been conducted on the topic. These reviews have mainly included studies comparing the intervention under examination with so called no treatment conditions (waiting-list, treatment as usual (TAU)) (5, 6). Other reviews included also active comparisons with other psychological treatments (7–9). An attempt to provide information on active comparisons was made by Turner and colleagues, who performed separate meta-analysis when there were at least five eligible randomized controlled trials comparing one intervention to another psychological intervention (10). However, all the available reviews applied pairwise meta-analysis as a method, being able to pool results only when a comparison of two treatments was considered in existing studies. The comparative efficacy and tolerability of the existing interventions has not been checked yet; as a result, it is still currently unclear which are the most efficacious, the most acceptable and the best tolerable psychological treatments for schizophrenia.

To overcome this gap in the current knowledge, a network meta-analysis would be necessary to consider both direct and indirect comparisons, and produce hierarchies of the effects of the various psychological treatments in the various efficacy and tolerability outcomes. Such hierarchies are essential for guidelines, which should ideally be able to indicate which treatment is likely to be the best, the second best and so on for a given outcome. Only the method of network meta-analysis can provide such hierarchies by combining all the randomised evidence. Our aim is to produce such a network meta-analysis of all psychological interventions for schizophrenia in multiple outcomes. We focus here on the interventions primarily aimed at treating positive symptoms in the acute phase of the illness.

| Intervention                                                                                                                        | Existing reviews                               | RCT* | Comparator                                                                                                                                                                                                                                                                                                             |
|-------------------------------------------------------------------------------------------------------------------------------------|------------------------------------------------|------|------------------------------------------------------------------------------------------------------------------------------------------------------------------------------------------------------------------------------------------------------------------------------------------------------------------------|
| <b>Acceptance and commitment therapy</b>                                                                                            | Ongoing Cochrane review (11)                   | -    | TAU, pharmacological intervention, another psychosocial intervention                                                                                                                                                                                                                                                   |
| <b>Adherence interventions</b>                                                                                                      | Gray 2016 (12)                                 | 6    | TAU, didactic health education                                                                                                                                                                                                                                                                                         |
| <b>Active comparisons (Befriending, CBT, Cognitive remediation, Psychoeducation, Social skills training, Supportive counseling)</b> | Turner 2014 (10)                               | 48   | Befriending, CBT, Cognitive remediation, Psychoeducation, Social skills training, Supportive counseling, Family intervention, Art therapy, Body psychotherapy, Occupational therapy, Problem-solving therapy                                                                                                           |
| <b>Art therapy</b>                                                                                                                  | Ruddy 2005 (6)                                 | 2    | Standard care                                                                                                                                                                                                                                                                                                          |
| <b>Assertive community treatment</b>                                                                                                | Marshall 1998 (13)                             | 20** | TAU, hospital-based rehabilitation, case management                                                                                                                                                                                                                                                                    |
| <b>Befriending</b>                                                                                                                  | -                                              |      |                                                                                                                                                                                                                                                                                                                        |
| <b>Bibliotherapy</b>                                                                                                                | -                                              |      |                                                                                                                                                                                                                                                                                                                        |
| <b>Body oriented psychological therapy</b>                                                                                          | -                                              |      |                                                                                                                                                                                                                                                                                                                        |
| <b>Case management</b>                                                                                                              | Dieterich 2017 (14)                            | 40** | Assertive Community Treatment, Assertive Outreach model, Case Management model, standard community care                                                                                                                                                                                                                |
|                                                                                                                                     | Zimmermann 2005 (positive symptoms) (9)        | 15   | Waiting-list, TAU or another therapeutic treatment                                                                                                                                                                                                                                                                     |
|                                                                                                                                     | Jones 2012 (7)                                 | 20   | Active (Psychoeducation, Family Intervention, Supportive Psychotherapy, Supportive Counselling, Cognitive Remediation) and nonactive control treatments (Recreation and support, social activities, befriending, non-specific counselling)                                                                             |
|                                                                                                                                     |                                                |      | Waiting list, TAU or an intervention designed to control for the non-specific effects of psychotherapy (recreation and support, group support, befriending, supportive counselling/therapy, social activity therapy and goal-focused supportive contact) or active treatments (cognitive remediation, psychoeducation) |
| <b>Cognitive behavioural therapy</b>                                                                                                | Jauhar 2013 (15)                               | 52   | Waiting list, TAU or an intervention designed to control for the non-specific effects of psychotherapy (recreation and support, group support, befriending, supportive counselling/therapy, social activity therapy and goal-focused supportive contact) or active treatments (cognitive remediation, psychoeducation) |
|                                                                                                                                     | Van der Gaag 2014 (individually tailored) (16) | 18   | Any control condition was accepted                                                                                                                                                                                                                                                                                     |
|                                                                                                                                     | Hazell 2016 (low intensity) (17)               | 8    | TAU, supportive psychotherapy                                                                                                                                                                                                                                                                                          |
|                                                                                                                                     | Kennedy 2016 (auditory hallucinations) (18)    | 2    | Non-specialized therapy (focused on supportive interactions and social integration)                                                                                                                                                                                                                                    |
| <b>Cognitive remediation</b>                                                                                                        | Cella 2016 (19)                                | 45   | TAU, active control (e.g. computer games) another active treatment (e.g. CBT)                                                                                                                                                                                                                                          |
| <b>Dance therapy</b>                                                                                                                | Ren 2013 (20)                                  | 1    | Standard care plus supportive counselling                                                                                                                                                                                                                                                                              |
|                                                                                                                                     | Pitschel-Walz 2001 (21)                        | 25   | TAU, patient intervention, other family interventions                                                                                                                                                                                                                                                                  |
| <b>Family interventions</b>                                                                                                         | Pharoah 2006 (22)                              | 25   | TAU, discussion groups, psychoeducation, supportive psychotherapy, psychosocial support                                                                                                                                                                                                                                |
|                                                                                                                                     |                                                |      | TAU, other groups (active discussion group, support group, counselling group, occupational therapy group or problem-solving discussion group)                                                                                                                                                                          |
| <b>Group psychotherapeutic treatments</b>                                                                                           | Orfanos 2015 (23)                              | 34   | TAU, other groups (active discussion group, support group, counselling group, occupational therapy group or problem-solving discussion group)                                                                                                                                                                          |

|                                                                                        |                       |      |                                                                                                                                                                                                                   |
|----------------------------------------------------------------------------------------|-----------------------|------|-------------------------------------------------------------------------------------------------------------------------------------------------------------------------------------------------------------------|
| <b>Integrated psychological Therapy (IPT)</b>                                          | Roder 2006 (24)       | 16   | TAU, placebo-attention condition, other active treatments                                                                                                                                                         |
| <b>Psychological and psychosocial interventions for negative symptoms in psychosis</b> | Lutgens 2017 (8)      | 95   | TAU, active comparator (including psychoeducation, supportive therapy, cognitive remediation)                                                                                                                     |
| <b>Metacognitive training</b>                                                          | Eichner 2016 (25)     | 12   | TAU, Wait list control, Supportive Therapy, Newspaper discussion group, CogPack (=Cognitive remediation)                                                                                                          |
| <b>Mindfulness</b>                                                                     | Aust 2017 (26)        | 11** | Active control intervention (e.g. Befriending, Progressive Muscle Relaxation), TAU                                                                                                                                |
| <b>Music therapy</b>                                                                   | Geretsegger 2017 (27) | 18   | Placebo defined as an alternative therapy designed to control for effects of the therapist's attention; TAU or no treatment                                                                                       |
| <b>Psychodynamic therapy</b>                                                           | Malmberg 2012 (28)    | 4    | Reality-adaptive, supportive psychotherapy, Hospital comparison, Ataraxic drugs, electro convulsive therapy, Milieu therapy, individual vs. group                                                                 |
| <b>Psychoeducation</b>                                                                 | Pekkala 2006 (29)     | 10   | TAU, supportive psychotherapy, behavioral intervention, leisure-time group                                                                                                                                        |
| <b>Social skills training</b>                                                          | Almerie 2015 (30)     | 13   | TAU, structured activities, discussion group, interaction group, no treatment control                                                                                                                             |
| <b>Supportive therapy</b>                                                              | Buckley 2015 (31)     | 24   | Standard care, any other treatment (biological, psychological or social) such as medication, problem-solving therapy, psychoeducation, social skills training, CBT, family therapy or psychodynamic psychotherapy |
| <b>Systemic therapy</b>                                                                | Pinquart 2016 (5)     | 7    | No treatment                                                                                                                                                                                                      |

**Table 1.** Existing reviews about psychological treatments for schizophrenia.

RCT: randomized controlled trial; TAU: treatment as usual.

\*number of RCTs on schizophrenic patients; \*\*RCTs about patients with severe mental illness including schizophrenia

## Objectives

To estimate relative treatment effects and obtain a hierarchy for the psychological treatments in patients with schizophrenia, in terms of:

1. Efficacy on positive symptoms
2. Acceptability
3. Other efficacy measures, such as overall symptoms, negative symptoms, response, relapse, adherence, depression, quality of life, functioning
4. Tolerability.

## METHODS AND ANALYSIS

### Criteria for considering studies for this review

Methods for this systematic review have been developed according to the Preferred Reporting Items for Systematic review and Meta-Analysis Protocols (PRISMA-P) checklist, and the PRISMA extension statement for reporting of systematic reviews incorporating network meta-analyses of healthcare interventions (32, 33). This systematic review and NMA is registered in the PROSPERO database (registration number: CRD42017067795); the record in PROSPERO will be updated with any amendment made to the protocol.

### *Types of studies*

We will include all randomised trials (RCTs) in which participants with schizophrenia received a psychological intervention as defined below (see *Types of interventions*). Studies whose sequence generation was at high risk of bias (e.g. randomization by the date of birth or day of the week) will be excluded. We will accept open and blinded RCTs; this choice is particularly relevant in trials on psychological interventions, in which in best case only the assessor of outcome can be blind, but not the therapist. Open RCTs will be excluded in a sensitivity analysis. We will include both trials in which psychological interventions were compared with a control condition and trials in which they were compared with another intervention. There will be no language restriction in order to avoid the problem of 'language bias' (34). As an exception, we will exclude studies conducted in mainland China (while studies conducted in Taiwan and Hong Kong will not be excluded) to avoid a systematic bias, since many of these studies do not use appropriate randomisation procedures and often do not report their methods (35, 36). In the case of cross-over studies we will use only the first cross-over phase in order to avoid the problem of carry-over effects which are very likely in schizophrenia and with psychological treatments. We will exclude cluster randomized trials.

### *Types of participants*

Our aim is to collect information on the efficacy of psychological treatments on patients with positive symptoms. In order to select this population, we operationalized the inclusion criteria as follows. We will include adults, however defined by study authors, with a diagnosis of schizophrenia or related disorders (such as schizophreniform, or schizoaffective disorders); there is no clear evidence that the latter schizophrenia-like psychoses are caused by fundamentally different disease processes or require different treatment approaches (37). We will include trials irrespective of the diagnostic criteria used. Here we will follow the strategy of the Cochrane Schizophrenia Group (38) to include not only studies that used specific diagnostic criteria such as ICD-10 or DSM-V, because these criteria are not meticulously used in clinical routine either. This decision should increase generalizability and representativeness.

Studies including participants with other diagnoses part of the psychosis spectrum will be included only if participants with a diagnosis of schizophrenia, schizophreniform or schizoaffective disorders were more than 80% of the participants considered. We will include studies recruiting patients with positive symptoms, either delusions, hallucinations or both, or acute phase of illness, however defined by inclusion criteria of the trial.

We will exclude studies focused on specific subpopulations of patients, such as (1) studies recruiting patients with predominant negative symptoms, (2) studies on patients with comorbid psychiatric disorders including substance abuse, (3) studies recruiting patients with concomitant medical illnesses, (4) trials enrolling stable patients (relapse prevention studies), (5) studies on first episode patients, (6) trials on patients who show prodromal signs of psychosis (also defined as "at risk for psychosis").

### *Types of interventions*

Any psychological intervention that occurs through interaction between therapist and patient, either face-to-face individually or in group, with the primary aim to reduce positive symptoms. Interventions with an explicit primary aim different from positive symptoms (e.g. functioning, cognition, adherence to medication, knowledge of the illness) will be excluded. Psychological



1  
2  
3 treatments will be compared to each other and to any non-pharmacological control condition  
4 considered in the included studies. Comparators will include the so called “treatment as usual”,  
5 waiting list and inactive treatments. “Non-active” comparators have been associated with a placebo  
6 effect, therefore their effect on the network will be analysed in a sensitivity analysis (39). Patients  
7 also receiving treatment as usual, including pharmacological interventions will be included. If  
8 psychological treatments that we do not include among the interventions (e.g. psychoeducation,  
9 supportive therapy) are used as control condition in the studies, they will be included as nodes in  
10 order to strengthen the network, but will not be part of our decision set.  
11  
12  
13

#### 14 *Outcome measures*

15 Outcomes will be measured at study endpoint, as defined in each study.

#### 16 **Primary outcome**

17  
18 Change in positive symptoms of schizophrenia, examined accordingly to the respective subscale of  
19 the Positive and Negative Syndrome Scale (PANSS), the Brief Psychiatric Rating Scale (BPRS) or the  
20 Scales for Assessment of Positive Symptoms (SAPS) or any other published scale.

21 As not all studies will have used the same scale, we will extract data according to the following  
22 hierarchy: mean change of the PANSS positive symptoms subscale from baseline to endpoint, if not  
23 available mean change of the BPRS positive symptoms subscale, or if again not available the mean  
24 values at endpoint of the PANSS/BPRS positive symptoms subscale. The results of other rating scales  
25 will only be used if the instrument has been published in a peer-reviewed journal, because it has  
26 been shown that non-validated schizophrenia scales exaggerate differences (40).  
27  
28  
29

#### 30 **Secondary outcomes**

- 31 1. Acceptability, defined as the percentage of patients leaving the study early (‘dropout’) for  
32 any reason. All-cause discontinuation due to any reason combines efficacy, tolerability,  
33 and other factors and can therefore be considered as a measure of ‘acceptability of  
34 treatment’ (38) or of overall “effectiveness”;
- 35 2. Change in overall symptoms, measured by rating scales such as the PANSS or the BPRS, or  
36 any other published scale (e.g. the Manchester Scale) for the assessment of overall  
37 schizophrenic symptomatology. The results of other rating scales will only be used if the  
38 instrument has been published in a peer-reviewed journal;
- 39 3. Change in negative symptoms, measured by the respective subscale of the PANSS, or the  
40 “Scales for Assessment of Negative Symptoms” (SANS) or any other published scale;
- 41 4. Response, measured by the percentage of responders defined by reduction on the PANSS,  
42 BPRS or CGI scores, accepting the criteria used by study authors;
- 43 5. Percentage of patients with relapse, by definitions operationalized by rating scales, and, if  
44 not available, number of rehospitalisations due to psychopathology. We will not include  
45 data from studies that used non-operationalized relapse criteria (e.g. “clinical  
46 judgement”);
- 47 6. Adherence, measured by any published rating scale (e.g. “Adherence Therapy Patients  
48 Satisfaction Questionnaire”, “Adherence Rating Scale”);
- 49 7. Depression, measured by the Calgary Depression Scale for Schizophrenia, the Hamilton  
50 Depression Rating Scale, the Montgomery Asberg Depression Scale or other published  
51 symptom scales;  
52  
53  
54  
55  
56  
57  
58  
59  
60

8. Quality of life, measured by any published rating scale (e.g. “Heinrichs quality of life scale”, Quality of Life Scale (QOLS));
9. Functioning, measured by rating scales such as the Global Assessment of Functioning or the Psychosocial Performance Scale, or any other published rating scale.
10. Tolerability, measured as the percentage of patients experiencing adverse events. Adverse events associated with psychological treatments are not covered as comprehensively as in trials on pharmacological treatments (41). However, there is a raising awareness of the importance of considering possible harms associated with psychological interventions (42). Therefore we will collect any available information in clinical studies about this outcome, using a classification proposed by Linden and colleagues (42): a) emergence of new symptoms; b) deterioration of existing symptoms; c) lack of improvement or deterioration of illness; d) prolongation of treatment; e) patient’s non-compliance; f) strains in the patient-therapist relationship; g) very good patient-therapist relationship, therapy dependency; h) strains or changes in family relations; i) strains or changes in work relations; l) any change in the life circumstances of the patient; m) stigmatization. Suicide attempts and any other possible adverse event related to psychological treatment will also be considered.
11. Mortality. Psychosocial treatments may actually reduce or, by contrast, increase overall mortality, in particular connected to suicidality. To test this, we will examine this outcome in terms of a) death for any reason, b) death due to natural causes and c) due to suicide.

## Search strategy

### *Electronic searches*

The following sources will be searched without restrictions for language or publication period: EMBASE, MEDLINE, PsycINFO, PUBMED. The search terms that will be used for PubMed are provided as Supplement material. We will also search the following international databases:

1. WHO International Clinical Trials Registry Platform (ICTRP)
2. BIOSIS
3. Cochrane Collaboration Controlled Trials Register
4. ClinicalTrials.gov.

### *Reference lists and other sources*

References of all selected studies will be inspected for other published reports and citations of unpublished studies. We will also inspect previous reviews conducted on psychological treatments for schizophrenia to check if some studies meet our inclusion criteria as well. In addition, we will contact the first author of each included study published in the last 30 years for missing information about their studies.

## Identification and selection of studies

Studies identified through electronic and manual searches will be listed with citation, titles and abstracts, in Citavi; duplicates will be excluded. The eligibility for inclusion process will be conducted in two separate stages:

1. Two authors will independently inspect title and abstracts identified in the literature searches, and exclude those not pertinent. Disagreement will be resolved by discussion, and where doubt

1  
2  
3 still remains, we will acquire the full article for further inspection and the article will proceed to  
4 the next stage;

- 5 2. Once the full articles are obtained, two reviewers will independently assess them for eligibility.  
6 Disagreements will be resolved by discussion, and, if needed, a third senior author will be  
7 involved. When required, further information will be obtained from study authors.  
8  
9

## 10 **Data extraction**

11 Two authors will independently extract data from all selected trials. When disagreement arises we  
12 will resolve it by discussion and, if needed, involving a third senior author. Where this is not sufficient  
13 we will contact the study authors.

14 The following data will be collected from each included study:

- 15  
16 • Study citation, year(s) of study, registration number to trials registries, year of publication,  
17 location, setting, number of centers, sample size, diagnostic criteria, funding/sponsor (industry or  
18 academic);  
19  
20 • Methodology, including study design (type of RCT), number of arms, risk of bias (see below);  
21  
22 • Characteristics of study participants, including gender, age, details on diagnosis, number  
23 randomized to each arm, sociodemographic characteristics, whether psychological treatments  
24 naïve at baseline, or with previous experience with the experimental intervention);  
25  
26 • Characteristics of intervention, including number and frequency of sessions, therapy setting,  
27 expertise of therapist, researcher allegiance at study arm level;  
28  
29 • Outcome measures, including information on whether an Intention to Treat (ITT) approach has  
30 been used and how it was defined.

31 The two reviewers will independently input data into an Access database especially created for this  
32 study. The software will automatically detect any inconsistencies, and they will be resolved by  
33 discussion.  
34

### 35 *Measurement of treatment effect*

36 Relative treatment effects

- 37 • Continuous outcomes: For continuous outcomes we will use the standardized mean difference  
38 (SMD), because we expect that the studies use different rating scales of overall  
39 schizophrenia symptomatology.  
40  
41 • Dichotomous outcomes: The effect size for dichotomous outcomes will be the risk ratio (RR) and  
42 its 95% confidence intervals (CIs).  
43  
44

45 Relative treatment ranking

46 We will estimate the probability for each intervention to be ranked at each possible place, given the  
47 relative effect sizes as estimated in NMA. As described in Salanti et al (43) we will obtain a hierarchy  
48 of the competing interventions using the Surface Under the Cumulative Ranking curve (SUCRA) and  
49 mean ranks. SUCRA values will be expressed as percentage, showing the relative probability of an  
50 intervention to be among the best options.  
51  
52

### 53 *Dealing with missing outcome data and missing statistics*

54 For continuous outcomes we will extract data for all randomized patients if possible, and we will give  
55 preference to data based on mixed-effect models of repeated measurements of multiple imputations  
56 over last-observation-carried-forward data.  
57  
58

We will use published standard deviations (SDs), where available. When standard errors instead of SDs are presented, the former will be converted to SDs (44). If both are missing we will estimate SDs from p-values or confidence intervals, as described in Section 7.7.3 of the Cochrane Handbook for Systematic Reviews (45). If none of these options is viable we will contact the original authors. When no information can be obtained we will derive SDs from those of the other studies using a validated imputation technique (44).

For dichotomous outcomes, everyone allocated to the intervention will be counted whether they completed the follow up or not. If the authors applied such a strategy, we will use their results. If the original authors presented only the results of the per-protocol or completer population, we will assume that those participants lost to follow-up would not have changed in a given outcome. In terms of efficacy this means that they would be conservatively considered to have not responded to treatment or control. In terms of tolerability it would mean that participants would not have developed a side-effect.

## **Risk of bias assessment**

Risk of bias will be assessed for each included study using the Cochrane Collaboration 'risk of bias' tool (45, 46). The following domains will be considered:

1. Sequence generation: was the allocation sequence adequately generated?
2. Allocation concealment: was allocation adequately concealed?
3. Blinding of participants: was knowledge of the allocated treatment adequately prevented during the study? Given the peculiarity of the included studies, in which the therapist cannot be blind, we will consider under this item only if a way was found to keep patients unaware of the treatment they were receiving (even if we expect this will not be likely);
4. Blinding of outcome assessors: were outcome evaluated by blind raters? Were adequate measures taken to prevent them to discover treatment allocation during the study?
5. Incomplete outcome data: were incomplete outcome data adequately addressed?
6. Selective reporting: are reports of the study free from suggestion of selective outcome reporting?
7. Researcher's allegiance: do the researchers involved have a vested interest for the psychological treatment under investigation? We will additionally consider this point as possible source of bias, since it has been claimed to be relevant in trials on psychological interventions (47, 48, 49).

A description of what was reported about the same domains in each study will be provided, and a judgement on the risk of bias will be made for each one of them, based on the following three categories: 'high risk of bias', 'low risk of bias' and 'unclear risk of bias' where information are not sufficient to make a judgement. Two independent review authors will assess the risk of bias in selected studies. Any disagreement will be resolved through discussion. Where necessary, the authors of the studies will be contacted for further information. Studies will be classified as having low risk of bias if none of the domains above was rated as high risk of bias and three or less were rated as unclear risk; moderate if one was rated as high risk of bias or none was rated as high risk of bias but four or more were rated as unclear risk, and all other cases will be assumed to pertain to high risk of bias (50). We will not include studies in the data analyses whose sequence generation was at high risk of bias (e.g. randomization by the date of birth or day of the week). Effects of high risk of bias in the other domains will be analyzed by sensitivity analyses.

## **Data analysis**

### *Characteristics of the included studies*

1  
2  
3 We will produce descriptive statistics and study population characteristics across all eligible trials,  
4 describing the types of comparisons and other clinical or methodological variables, such as age,  
5 duration of illness, co-medication, country, duration of study and number of session.  
6

### 7 *Two-step procedure*

8  
9 In a first step we will perform series of conventional pair-wise meta-analyses by combining studies  
10 that compared the same interventions, including the comparison between active treatments and the  
11 different control arms. In subgroups with very few RCTs available or if the requirements of network  
12 meta-analysis are not met it can be that network meta-analysis will not be appropriate and in this  
13 case, conventional pairwise meta-analysis will be the most straightforward approach. As  
14 heterogeneity is likely, a random effects model will be used. In a second step we will then perform a  
15 network meta-analysis within a frequentist framework.  
16  
17

### 18 *Assessment of heterogeneity*

19  
20 The heterogeneity (variability in relative treatment effects within the same treatment comparison)  
21 will be measured with the tau-squared (the variance of the random effects distribution). The  
22 heterogeneity variance will be assumed common across the various treatment comparisons (grouped  
23 by comparison type) and the empirical distributions will be used to characterize the amount of  
24 heterogeneity as low, moderate or high using the first and third quantiles (51–53). Potential reasons  
25 for heterogeneity will be explored by subgroup analysis (see below).  
26  
27

### 28 *Assessment of the transitivity assumption*

29  
30 Joint analysis of treatments can be misleading if the network is substantially intransitive. We assume  
31 that patients who fulfill the inclusion criteria outlined in criteria for considering studies for this  
32 review section are equally likely to be randomised to any of the interventions that we plan to  
33 compare. We will need to investigate the distribution of clinical and methodological variables that  
34 can act as effect modifiers across treatment comparisons (54). We have maximized the chances of  
35 transitivity in our network with regard to clinical variables by limiting our samples to participants  
36 with schizophrenia and excluding specific subgroups like first episode patients or patients with  
37 prevalent negative symptoms. Other clinical or methodological variables that may influence the  
38 efficacy of psychological interventions include administration mode and frequency of the treatment  
39 (like number of sessions and experience of the therapist), baseline severity (see below, “Investigation  
40 of heterogeneity and inconsistency”), and blinding, which will also be assessed in sensitivity analyses.  
41 We will investigate if these variables are similarly distributed across studies grouped by comparison.  
42 The comparability of studies comparing the intervention with treatment as usual or waiting list  
43 conditions with those that provide head-to-head evidence will be examined carefully.  
44  
45  
46  
47

### 48 *Network meta-analysis*

49  
50 Network meta-analysis combines direct and indirect evidence for all relative treatment effects and  
51 can therefore provide estimates with maximum power and increased precision (55). If the collected  
52 studies appear to be sufficiently similar with respect to the distribution of effect modifiers (refer  
53 Assessment of transitivity assumption section), we will conduct a random-effects NMA to synthesize  
54 all evidence for each outcome, and obtain a comprehensive ranking of all treatments. We will  
55 assume a single heterogeneity parameter for each network. We will present the summary SMDs or  
56 RRs for all pairwise comparisons in a league table. We will also estimate the prediction intervals to  
57  
58

1  
2  
3 assess how much the common heterogeneity affects the relative effect with respect to the extra  
4 uncertainty anticipated in a future study. To rank the various treatments for each outcome, we will  
5 use the surface under the cumulative ranking curve (SUCRA) and the mean ranks.  
6  
7

### 8 *Assessment of inconsistency*

9 The strategical and conceptual evaluation of transitivity will be supplemented with a statistical  
10 evaluation of consistency, the agreement between direct and indirect evidence. We will employ local  
11 as well as global methods to evaluate consistency (56). Local methods detect 'hot spots' of  
12 inconsistency, evidence loops that are inconsistent or comparisons for which direct and indirect  
13 evidence disagree. We will employ a method that separates direct evidence from indirect evidence  
14 provided by the entire network and then evaluate the agreement of these two pieces of evidence  
15 (57). We will also evaluate consistency in the entire network by calculating the design-by-treatment  
16 interaction test and I-squared for network heterogeneity, inconsistency, and for both (58). Tests for  
17 inconsistency are known to have low power, and empirical evidence has suggested that 10% of  
18 evidence loops published in the medical literature are expected to be inconsistent (60). Therefore,  
19 interpretation of the statistical inference about inconsistency will be carried out with caution and  
20 possible sources of inconsistency will be explored even in the absence of evidence for inconsistency.  
21  
22  
23  
24

### 25 *Investigation of heterogeneity and inconsistency*

26 We expect small amounts of heterogeneity and inconsistency to be present given the variety of study  
27 settings we plan to include. The following potential effect modifiers of the primary outcome will be  
28 explored by subgroup analyses:  
29

- 30 a) Number of sessions
- 31 b) Study duration
- 32 c) Setting: individual vs group
- 33 d) Expertise of the therapist
- 34 e) Baseline severity (PANSS or BPRS score at baseline)
- 35 f) High versus low and middle income countries.  
36  
37

### 38 *Sensitivity analyses*

39 We will explore the following sensitivity analyses by excluding:

- 40 a) studies in which the outcome assessor was not blind (open studies)
- 41 b) studies that presented only completer analyses
- 42 c) studies characterized as pertaining to high risk of bias
- 43 d) studies with high risk of bias in researchers' allegiance
- 44 e) studies focused on treatment resistant patients (study defined)
- 45 f) studies with a non-active comparison group.  
46  
47  
48

### 49 *Publication bias*

50 We will first examine funnel plots of pairwise MAs if there are 10 or more studies included. We will  
51 also explore the association between study size and effect size with a comparison-adjusted funnel  
52 plot that has been adapted to network meta-analysis (59).  
53  
54

### 55 *Evaluating the quality of the evidence*

1  
2  
3 The quality of evidence contributing to each network estimate will be evaluated using an adaptation  
4 of the Grading of Recommendations Assessment, Development and Evaluation (GRADE) framework  
5 specifically developed for network meta-analysis (56). We will characterize the credibility of a body  
6 of evidence based on the study limitations, imprecision, heterogeneity/inconsistency, indirectness,  
7 and publication bias.  
8

### 9 10 *Statistical software*

11 The analysis and presentation of results will be performed using the Stata packages network and  
12 network\_graphs, the R package netmeta.  
13

## 14 15 **ETHICS AND DISSEMINATION**

16 This review does not require ethical approval. Findings will be published in peer reviewed scientific  
17 journals, granting open access, and the database will be made publicly available (in agreement with  
18 European Research Council Guidelines on Implementation of Open Access to Scientific Publications  
19 and Research Data ([http://ec.europa.eu/research/participants/data/ref/h2020/other/hi/oa-  
20 pilot/h2020-hi-erc-oa-guide\\_en.pdf](http://ec.europa.eu/research/participants/data/ref/h2020/other/hi/oa-pilot/h2020-hi-erc-oa-guide_en.pdf))).  
21  
22

## 23 24 **REFERENCES**

- 25 1. Vos T, Flaxman AD, Naghavi M, Lozano R, Michaud C, Ezzati M et al. Years lived with disability (YLDs) for 1160  
26 sequelae of 289 diseases and injuries 1990-2010: a systematic analysis for the Global Burden of Disease Study  
27 2010. *Lancet* 2012; 380(9859):2163–96.  
28
- 29 2. Leucht S, Cipriani A, Spineli L, Mavridis D, Orey D, Richter F et al. Comparative efficacy and tolerability of 15  
30 antipsychotic drugs in schizophrenia: a multiple-treatments meta-analysis. *Lancet* 2013; 382(9896):951–62.  
31
- 32 3. National Collaborating Centre for Mental Health. Core interventions in the treatment and management of  
33 schizophrenia in adults in primary and secondary care (Clinical Guideline CG82). London; 2009.  
34
- 35 4. Buchanan RW, Kreyenbuhl J, Kelly DL, Noel JM, Boggs DL, Fischer BA et al. The 2009 schizophrenia PORT  
36 psychopharmacological treatment recommendations and summary statements. *Schizophr Bull* 2010; 36(1):71–  
37 93.  
38
- 39 5. Pinquart M, Oslejsek B, Teubert D. Efficacy of systemic therapy on adults with mental disorders: A meta-  
40 analysis. *Psychother Res* 2016; 26(2):241–57.  
41
- 42 6. Ruddy R, Milnes D. Art therapy for schizophrenia or schizophrenia-like illnesses. *Cochrane Database Syst Rev*  
43 2005; (4):CD003728.  
44
- 45 7. Jones C, Hacker D, Cormac I, Meaden A, Irving CB. Cognitive behaviour therapy versus other psychosocial  
46 treatments for schizophrenia. *Cochrane Database Syst Rev* 2012; (4):CD008712.  
47
- 48 8. Lutgens D, Garipey G, Malla A. Psychological and psychosocial interventions for negative symptoms in  
49 psychosis: Systematic review and meta-analysis. *Br J Psychiatry* 2017; 210(5):324–32.  
50
- 51 9. Zimmermann G, Favrod J, Trieu VH, Pomini V. The effect of cognitive behavioral treatment on the positive  
52 symptoms of schizophrenia spectrum disorders: A meta-analysis. *Schizophr Res* 2005; 77(1):1–9.  
53
- 54 10. Turner DT, van der Gaag M, Karyotaki E, Cuijpers P. Psychological interventions for psychosis: a meta-  
55 analysis of comparative outcome studies. *Am J Psychiatry* 2014; 171(5):523–38.  
56
- 57 11. Naeem F, Asmer MS, Khoury B, Kingdon D, Farooq S. Acceptance and Commitment Therapy for  
58 schizophrenia and related disorders (Protocol). *Cochrane Database of Systematic Reviews* 2015; (6).  
59

12. Gray R, Bressington D, Ivanecka A, Hardy S, Jones M, Schulz M et al. Is adherence therapy an effective adjunct treatment for patients with schizophrenia spectrum disorders? A systematic review and meta-analysis. *BMC Psychiatry* 2016; 16:90.
13. Marshall M, Lockwood A. Assertive community treatment for people with severe mental disorders. *Cochrane Database Syst Rev* 2000; (2):CD001089.
14. Dieterich M, Irving CB, Bergman H, Khokhar MA, Park B, Marshall M. Intensive case management for severe mental illness. *Cochrane Database Syst Rev* 2017; 1:CD007906.
15. Jauhar S, McKenna PJ, Radua J, Fung E, Salvador R, Laws KR. Cognitive-behavioural therapy for the symptoms of schizophrenia: systematic review and meta-analysis with examination of potential bias. *Br J Psychiatry* 2014; 204(1):20–9.
16. van der Gaag M, Valmaggia LR, Smit F. The effects of individually tailored formulation-based cognitive behavioural therapy in auditory hallucinations and delusions: A meta-analysis. *Schizophr Res* 2014; 156(1):30–7.
17. Hazell CM, Hayward M, Cavanagh K, Strauss C. A systematic review and meta-analysis of low intensity CBT for psychosis. *Clin Psychol Rev* 2016; 45:183–92.
18. Kennedy L, Yxrichis A. Cognitive Behavioral Therapy Compared with Non-specialized Therapy for Alleviating the Effect of Auditory Hallucinations in People with Reoccurring Schizophrenia: A Systematic Review and Meta-analysis. *Community Ment Health J* 2017; 53(2):127–33.
19. Cella M, Preti A, Edwards C, Dow T, Wykes T. Cognitive remediation for negative symptoms of schizophrenia: A network meta-analysis. *Clin Psychol Rev* 2017; 52:43–51.
20. Ren J, Xia J. Dance therapy for schizophrenia. *Cochrane Database Syst Rev* 2013; (10):CD006868.
21. Pitschel-Walz G, Leucht S, Bauml J, Kissling W, Engel RR. The effect of family interventions on relapse and rehospitalization in schizophrenia--a meta-analysis. *Schizophr Bull* 2001; 27(1):73–92.
22. Pharoah F, Mari J, Rathbone J, Wong W. Family intervention for schizophrenia. *Cochrane Database Syst Rev* 2010; (12):CD000088.
23. Orfanos S, Banks C, Priebe S. Are Group Psychotherapeutic Treatments Effective for Patients with Schizophrenia? A Systematic Review and Meta-Analysis. *Psychother Psychosom* 2015; 84(4):241–9.
24. Roder V, Mueller DR, Mueser KT, Brenner HD. Integrated psychological therapy (IPT) for schizophrenia: Is it effective? *Schizophr Bull* 2006; 32 Suppl 1:S81-93.
25. Eichner C, Berna F. Acceptance and Efficacy of Metacognitive Training (MCT) on Positive Symptoms and Delusions in Patients With Schizophrenia: A Meta-analysis Taking Into Account Important Moderators. *Schizophr Bull* 2016; 42(4):952–62.
26. Aust J, Bradshaw T. Mindfulness interventions for psychosis: A systematic review of the literature. *J Psychiatr Ment Health Nurs* 2017; 24(1):69–83.
27. Geretsegger M, Mössler KA, Bieleninik Ł, Chen X-J, Heldal TO, Gold C. Music therapy for people with schizophrenia and schizophrenia-like disorders. *Cochrane Database Syst Rev* 2017; 5:CD004025.
28. Malmberg L, Fenton M. Individual psychodynamic psychotherapy and psychoanalysis for schizophrenia and severe mental illness. *Cochrane Database Syst Rev* 2001; (3):CD001360.
29. Pekkala E, Merinder L. Psychoeducation for schizophrenia. *Cochrane Database Syst Rev* 2000; (4):CD002831.
30. Almerie MQ, Okba Al Marhi M, Jawoosh M, Alsabbagh M, Matar HE, Maayan N et al. Social skills programmes for schizophrenia. *Cochrane Database Syst Rev* 2015; (6):CD009006.



- 1  
2  
3 31. Buckley LA, Maayan N, Soares-Weiser K, Adams CE. Supportive therapy for schizophrenia. *Cochrane Database Syst Rev* 2015; (4):CD004716.  
4  
5 32. Hutton B, Salanti G, Caldwell DM, Chaimani A, Schmid CH, Cameron C et al. The PRISMA extension  
6 statement for reporting of systematic reviews incorporating network meta-analyses of health care  
7 interventions: Checklist and explanations. *Ann Intern Med* 2015; 162(11):777–84.  
8  
9 33. Shamseer L, Moher D, Clarke M, Ghersi D, Liberati A, Petticrew M et al. Preferred reporting items for  
10 systematic review and meta-analysis protocols (PRISMA-P) 2015: Elaboration and explanation. *BMJ* 2015;  
11 349:g7647.  
12  
13 34. Egger M, Zellweger-Zahner T, Schneider M, Junker C, Lengeler C, Antes G. Language bias in randomised  
14 controlled trials published in English and German. *Lancet* 1997; 350(9074):326–9.  
15  
16 35. Wu T, Li Y, Liu G, Bian Z, Li J, Zhang J, Xie L, Ni J, editor. Investigation of authenticity of 'claimed' randomized  
17 controlled trials (RCTs) and quality assessment of RCT reports published in China; 2006.  
18  
19 36. Woodhead M. 80% of China's clinical trial data are fraudulent, investigation finds. *BMJ* 2016; 355:i5396.  
20  
21 37. Carpenter WT, JR, Buchanan RW. Schizophrenia. *N Engl J Med* 1994; 330(10):681–90.  
22  
23 38. Adams,C.E., Coutinho,E., Davis,J.M., Duggan,L., Essali,A., Fenton,M., Li,C., Jayaram,M., Leucht,S., Tharyan,P.,  
24 Välimäki,M. Cochrane Schizophrenia Group. The Cochrane Library. Chichester, UK: John Wiley & Sons Ltd;  
25 2011.  
26  
27 39. Furukawa TA, Noma H, Caldwell DM, Honyashiki M, Shinohara K, Imai H et al. Waiting list may be a placebo  
28 condition in psychotherapy trials: a contribution from network meta-analysis. *Acta Psychiatr Scand* 2014;  
29 130(3):181–92.  
30  
31 40. Marshall M, Lockwood A, Bradley C, Adams C, Joy C, Fenton M. Unpublished rating scales: a major source of  
32 bias in randomised controlled trials of treatments for schizophrenia. *Br J Psychiatry* 2000; 176:249–52.  
33  
34 41. Vaughan B, Goldstein MH, Alikakos M, Cohen LJ, Serby MJ. Frequency of reporting of adverse events in  
35 randomized controlled trials of psychotherapy vs. psychopharmacotherapy. *Compr Psychiatry* 2014; 55(4):849–  
36 55.  
37  
38 42. Linden M, Schermuly-Haupt M-L. Definition, assessment and rate of psychotherapy side effects. *World*  
39 *Psychiatry* 2014; 13(3):306–9.  
40  
41 43. Salanti G, Ades AE, Ioannidis JPA. Graphical methods and numerical summaries for presenting results from  
42 multiple-treatment meta-analysis: an overview and tutorial. *J Clin Epidemiol* 2011; 64(2):163–71.  
43  
44 44. Furukawa TA, Barbui C, Cipriani A, Brambilla P, Watanabe N. Imputing missing standard deviations in meta-  
45 analyses can provide accurate results. *J Clin Epidemiol* 2006; 59(1):7–10.  
46  
47 45. Higgins JPT, editor. *Cochrane Handbook for Systematic Reviews of Interventions*. Version 5.1.0 [updated  
48 March 2011]; 2011.  
49  
50 46. Higgins JPT, Altman DG, Sterne JAC (editors), editor. Assessing risk of bias in included studies. In: Higgins  
51 JPT, Churchill R, Chandler J, Cumpston MS (editors), *Cochrane Handbook for Systematic Reviews of*  
52 *Interventions* version 5.2.0 (updated June 2017); Cochrane, 2017. Available from: URL:  
53 <http://training.cochrane.org/handbook>.  
54  
55 47. Dragioti E, Dimoliatis I, Evangelou E. Disclosure of researcher allegiance in meta-analyses and randomised  
56 controlled trials of psychotherapy: a systematic appraisal. *BMJ Open* 2015; 5(6):e007206.  
57  
58 48. Lieb K, Osten-Sacken J von der, Stoffers-Winterling J, Reiss N, Barth J. Conflicts of interest and spin in  
59 reviews of psychological therapies: a systematic review. *BMJ Open* 2016; 6(4):e010606.  
60

- 1  
2  
3 49. Munder T, Brusch O, Leonhart R, Gerger H, Barth J. Researcher allegiance in psychotherapy outcome  
4 research: an overview of reviews. *Clin Psychol Rev* 2013; 33(4):501–11.
- 5  
6 50. Furukawa TA, Salanti G, Atkinson LZ, Leucht S, Ruhe HG, Turner EH et al. Comparative efficacy and  
7 acceptability of first-generation and second-generation antidepressants in the acute treatment of major  
8 depression: Protocol for a network meta-analysis. *BMJ Open* 2016; 6(7):e010919.
- 9  
10 51. Rhodes KM, Turner RM, White IR, Jackson D, Spiegelhalter DJ, Higgins JPT. Implementing informative priors  
11 for heterogeneity in meta-analysis using meta-regression and pseudo data. *Stat Med* 2016; 35(29):5495–511.
- 12  
13 52. Rhodes KM, Turner RM, Higgins JPT. Empirical evidence about inconsistency among studies in a pair-wise  
14 meta-analysis. *Res Synth Methods* 2016; 7(4):346–70.
- 15  
16 53. Turner RM, Davey J, Clarke MJ, Thompson SG, Higgins JP. Predicting the extent of heterogeneity in meta-  
17 analysis, using empirical data from the Cochrane Database of Systematic Reviews. *Int J Epidemiol* 2012;  
18 41(3):818–27.
- 19  
20 54. Salanti G. Indirect and mixed-treatment comparison, network, or multiple-treatments meta-analysis: Many  
21 names, many benefits, many concerns for the next generation evidence synthesis tool. *Res Synth Methods*  
22 2012; 3(2):80–97.
- 23  
24 55. Salanti G, Higgins JPT, Ades AE, Ioannidis JPA. Evaluation of networks of randomized trials. *Stat Methods*  
25 *Med Res* 2008; 17(3):279–301.
- 26  
27 56. Salanti G, Del Giovane C, Chaimani A, Caldwell DM, Higgins JPT. Evaluating the quality of evidence from a  
28 network meta-analysis. *PLoS One* 2014; 9(7):e99682.
- 29  
30 57. Dias S, Welton NJ, Caldwell DM, Ades AE. Checking consistency in mixed treatment comparison meta-  
31 analysis. *Stat Med* 2010; 29(7-8):932–44.
- 32  
33 58. Higgins JPT, Jackson D, Barrett JK, Lu G, Ades AE, White IR. Consistency and inconsistency in network meta-  
34 analysis: Concepts and models for multi-arm studies. *Res Synth Methods* 2012; 3(2):98–110.
- 35  
36 59. Chaimani A, Salanti G. Using network meta-analysis to evaluate the existence of small-study effects in a  
37 network of interventions. *Res Synth Methods* 2012; 3(2):161–76.
- 38  
39 60. Veroniki AA, Vasiliadis HS, Higgins JPT, Salanti G. Evaluation of inconsistency in networks of interventions.  
40 *Int J Epidemiol* 2013; 42(1):332–45.

41  
42  
43  
44  
45  
46  
47  
48  
**Authors' contributions:** IB and SL designed this study, drafted and critically revised the  
49 protocol. IB will screen search results for inclusion, conduct data extraction and data analysis, and  
50 draft the final manuscript. SL will assist with data extraction and analysis, and revise the final  
51 manuscript. CR and SW will screen search results for inclusion and conduct data extraction. GS  
52 provided substantial methodological advice in planning the study, and will assist with data analysis.  
53 CB and TF contributed with clinical and methodological input in planning the study. All authors  
54 contributed to and have approved the final manuscript.

55  
56  
57  
58  
**Collaborators:** Samantha Roberts helped us to conduct the literature searches. Maximilian Huhn,  
59 Johannes Schneider-Thoma, Marc Krause and Costanza Carmi provided help and suggestions.

60  
**Funding:** This project has received funding from the European Union's Horizon 2020 Research and  
Innovation Programme under the Marie Skłodowska-Curie grant agreement N° 701717. This work  
was also supported by the German Research Foundation (DFG) and the Technical University of

1  
2  
3 Munich within the Open Access Publishing Funding Programme. The funder had no role in developing  
4 the protocol.  
5

6  
7 **Competing interests:** SL in the past 3 years has received honoraria for consulting from Roche,  
8 TEVA, Otsuka, Lundbeck, and LB Pharma; for lectures from Otsuka, Lundbeck, Janssen, ICON, Lilly,  
9 Sanofi Aventis, AOP Orphan, Roche, and Servier; and for a publication from Roche. TAF has received  
10 lecture fees from Eli Lilly, Janssen, Meiji, Mitsubishi-Tanabe, MSD and Pfizer and consultancy fees  
11 from Takeda Science Foundation. He has received royalties from Igaku-Shoin and Nihon Bunka  
12 Kagaku-sha publishers. He has received research support from Mochida and Mitsubishi-Tanabe.  
13  
14  
15  
16  
17  
18  
19  
20  
21  
22  
23  
24  
25  
26  
27  
28  
29  
30  
31  
32  
33  
34  
35  
36  
37  
38  
39  
40  
41  
42  
43  
44  
45  
46  
47  
48  
49  
50  
51  
52  
53  
54  
55  
56  
57  
58  
59  
60

For peer review only

## Search terms for Pubmed

("Schizophrenia"[Mesh] OR "Paranoid Disorders"[Mesh] OR schizo\*[Title/Abstract] OR psychotic\*[Title/Abstract] OR psychosis[Title/Abstract] OR psychoses[Title/Abstract]) AND ("Psychotherapy"[Mesh] or "Behavior Therapy"[Mesh] or "Cognitive Therapy"[Mesh] or "Complementary Therapies"[Mesh] or "Psychoanalysis"[Mesh] or "Counseling"[Mesh] or "Hypnosis"[Mesh] or "Association"[Mesh] or "Association Learning"[Mesh] OR abreaction[Title/Abstract] OR "acceptance[Title/Abstract] AND commitment therapy"[Title/Abstract] OR "acting out"[Title/Abstract] OR adlerian[Title/Abstract] OR "analytical psychotherapy"[Title/Abstract] OR "analytical psychotherapies"[Title/Abstract] OR "anger control"[Title/Abstract] OR "anger management"[Title/Abstract] OR "animal therapy"[Title/Abstract] OR "animal therapies"[Title/Abstract] OR "art therapy"[Title/Abstract] OR "art therapies"[Title/Abstract] OR "assertive training"[Title/Abstract] OR "assertiveness training"[Title/Abstract] OR "attention training technique"[Title/Abstract] OR "autogenic training"[Title/Abstract] OR autosuggestion[Title/Abstract] OR "aversion therapy"[Title/Abstract] OR "aversion therapies"[Title/Abstract] OR "balint group"[Title/Abstract] OR befriending[Title/Abstract] OR "behavior contracting"[Title/Abstract] OR "behavior modification"[Title/Abstract] OR "behavior regulation"[Title/Abstract] OR "behavior therapy"[Title/Abstract] OR "behavior therapies"[Title/Abstract] OR "behaviour contracting"[Title/Abstract] OR "behaviour modification"[Title/Abstract] OR "behaviour regulation"[Title/Abstract] OR "behaviour therapy"[Title/Abstract] OR "behaviour therapies"[Title/Abstract] OR bibliotherapy[Title/Abstract] OR bibliotherapies[Title/Abstract] OR biofeedback[Title/Abstract] OR "body psychotherapy"[Title/Abstract] OR "body psychotherapies"[Title/Abstract] OR "brief psychotherapy"[Title/Abstract] OR "brief psychotherapies"[Title/Abstract] OR "caregiver support"[Title/Abstract] OR cbt[Title/Abstract] OR "client centre"[Title/Abstract] OR "client center"[Title/Abstract] OR "cognitive behavior"[Title/Abstract] OR "cognitive behavioral"[Title/Abstract] OR "cognitive intervention"[Title/Abstract] OR "cognitive interventions"[Title/Abstract] OR "cognitive rehabilitation"[Title/Abstract] OR "cognitive remediation"[Title/Abstract] OR "cognitive technique"[Title/Abstract] OR "cognitive techniques"[Title/Abstract] OR "cognitive therapy"[Title/Abstract] OR "cognitive therapies"[Title/Abstract] OR "cognitive treatment"[Title/Abstract] OR "cognitive treatments"[Title/Abstract] OR "color therapy"[Title/Abstract] OR "color therapies"[Title/Abstract] OR "colour therapy"[Title/Abstract] OR "colour therapies"[Title/Abstract] OR "compassionate mind training"[Title/Abstract] OR "conjoint therapy"[Title/Abstract] OR "conjoint therapies"[Title/Abstract] OR "contingency management"[Title/Abstract] OR "conversational therapy"[Title/Abstract] OR "conversational therapies"[Title/Abstract] OR "conversion therapy"[Title/Abstract] OR "conversion therapies"[Title/Abstract] OR "coping skills"[Title/Abstract] OR counseling[Title/Abstract] OR counselling[Title/Abstract] OR countertransference[Title/Abstract] OR "couples therapy"[Title/Abstract] OR "couples therapies"[Title/Abstract] OR "covert sensitization"[Title/Abstract] OR "covert sensitisation"[Title/Abstract] OR "crisis intervention"[Title/Abstract] OR "dance therapy"[Title/Abstract] OR "dance therapies"[Title/Abstract] OR dialectic[Title/Abstract] OR dialectical[Title/Abstract] OR "dream analysis"[Title/Abstract] OR eclectic[Title/Abstract] OR "emotion focused"[Title/Abstract] OR "emotionally focused"[Title/Abstract] OR "emotional freedom technique"[Title/Abstract] OR "encounter group therapy"[Title/Abstract] OR "encounter group therapies"[Title/Abstract] OR "existential therapy"[Title/Abstract] OR "existential therapies"[Title/Abstract] OR "experiential

1  
2  
3 psychotherapy"[Title/Abstract] OR "experiential psychotherapies"[Title/Abstract] OR "exposure  
4 therapy"[Title/Abstract] OR "exposure therapies"[Title/Abstract] OR "expressive  
5 psychotherapy"[Title/Abstract] OR "expressive psychotherapies"[Title/Abstract] OR "eye movement  
6 desensitization"[Title/Abstract] OR "eye movement desensitisation"[Title/Abstract] OR "family  
7 intervention"[Title/Abstract] OR "family interventions"[Title/Abstract] OR "family  
8 therapy"[Title/Abstract] OR "family therapies"[Title/Abstract] OR "feminist therapy"[Title/Abstract]  
9 OR "feminist therapies"[Title/Abstract] OR "free association"[Title/Abstract] OR  
10 freudian"[Title/Abstract] OR "geriatric psychotherapy"[Title/Abstract] OR "geriatric  
11 psychotherapies"[Title/Abstract] OR "gestalt therapy"[Title/Abstract] OR "gestalt  
12 therapies"[Title/Abstract] OR griefwork"[Title/Abstract] OR "group intervention"[Title/Abstract] OR  
13 "group interventions"[Title/Abstract] OR "group psychotherapy"[Title/Abstract] OR "group  
14 psychotherapies"[Title/Abstract] OR "group therapy"[Title/Abstract] OR "group  
15 therapies"[Title/Abstract] OR "guided imagery"[Title/Abstract] OR "holistic  
16 psychotherapy"[Title/Abstract] OR "holistic psychotherapies"[Title/Abstract] OR "humanistic  
17 psychotherapy"[Title/Abstract] OR "humanistic psychotherapies"[Title/Abstract] OR  
18 hypnosis"[Title/Abstract] OR hypnotherapy"[Title/Abstract] OR hypnotherapies"[Title/Abstract] OR  
19 hypnotizability"[Title/Abstract] OR hypnotisability"[Title/Abstract] OR imagery"[Title/Abstract] OR  
20 "implosive therapy"[Title/Abstract] OR "implosive therapies"[Title/Abstract] OR "individual  
21 psychotherapy"[Title/Abstract] OR "individual psychotherapies"[Title/Abstract] OR "insight  
22 therapy"[Title/Abstract] OR "insight therapies"[Title/Abstract] OR "integrated psychological  
23 therapy"[Title/Abstract] OR "integrative psychotherapy"[Title/Abstract] OR "integrative  
24 psychotherapies"[Title/Abstract] OR "integrative therapy"[Title/Abstract] OR "integrative  
25 therapies"[Title/Abstract] OR interpersonal"[Title/Abstract] OR jungian"[Title/Abstract] OR  
26 kleinian"[Title/Abstract] OR logotherapy"[Title/Abstract] OR logotherapies"[Title/Abstract] OR  
27 "marathon group therapy"[Title/Abstract] OR "marathon group therapies"[Title/Abstract] OR  
28 "marital therapy"[Title/Abstract] OR "marital therapies"[Title/Abstract] OR meditation"[Title/Abstract]  
29 OR "mental healing"[Title/Abstract] OR "metacognitive therapy"[Title/Abstract] OR "metacognitive  
30 therapies"[Title/Abstract] OR "metacognitive training"[Title/Abstract] OR "milieu  
31 therapy"[Title/Abstract] OR "milieu therapies"[Title/Abstract] OR mindfulness"[Title/Abstract] OR  
32 "morita therapy"[Title/Abstract] OR "morita therapies"[Title/Abstract] OR multimodal"[Title/Abstract]  
33 OR "music therapy"[Title/Abstract] OR "music therapies"[Title/Abstract] OR "narrative  
34 therapy"[Title/Abstract] OR "narrative therapies"[Title/Abstract] OR "nondirective  
35 therapy"[Title/Abstract] OR "nondirective therapies"[Title/Abstract] OR "object  
36 relations"[Title/Abstract] OR "person centred therapy"[Title/Abstract] OR "person centred  
37 therapies"[Title/Abstract] OR "person centered therapy"[Title/Abstract] OR "person centered  
38 therapies"[Title/Abstract] OR "personal construct therapy"[Title/Abstract] OR "personal construct  
39 therapies"[Title/Abstract] OR "persuasion therapy"[Title/Abstract] OR "persuasion  
40 therapies"[Title/Abstract] OR "pet therapy"[Title/Abstract] OR "pet therapies"[Title/Abstract] OR  
41 "play therapy"[Title/Abstract] OR "play therapies"[Title/Abstract] OR "primal therapy"[Title/Abstract]  
42 OR "primal therapies"[Title/Abstract] OR "problem solving"[Title/Abstract] OR  
43 psychoanalyse"[Title/Abstract] OR psychoanalysed"[Title/Abstract] OR psychoanalysis"[Title/Abstract]  
44 OR psychoanalytic"[Title/Abstract] OR psychodrama"[Title/Abstract] OR psychodynamic"[Title/Abstract]  
45 OR psychoeducate"[Title/Abstract] OR psychoeducation"[Title/Abstract] OR  
46 psychoeducating"[Title/Abstract] OR psychologic"[Title/Abstract] OR psychological"[Title/Abstract] OR  
47 psychologically"[Title/Abstract] OR "psychological therapy"[Title/Abstract] OR "psychological  
48 therapies"[Title/Abstract] OR "psychosocial treatment"[Title/Abstract] OR "psychosocial  
49  
50  
51  
52  
53  
54  
55  
56  
57  
58  
59

1  
2  
3 treatments"[Title/Abstract] OR psychotherapy[Title/Abstract] OR psychotherapies[Title/Abstract] OR  
4 "psychotherapeutic counsel"[Title/Abstract] OR "psychotherapeutic counseling"[Title/Abstract] OR  
5 "psychotherapeutic counselling"[Title/Abstract] OR "psychotherapeutic processes"[Title/Abstract] OR  
6 "psychotherapeutic training"[Title/Abstract] OR "psychotherapeutic treatment"[Title/Abstract] OR  
7 "psychotherapeutic treatments"[Title/Abstract] OR "rational emotive"[Title/Abstract] OR "reality  
8 therapy"[Title/Abstract] OR "reality therapies"[Title/Abstract] OR "reciprocal  
9 inhibition"[Title/Abstract] OR rehabilitation[Title/Abstract] OR rehabilitating[Title/Abstract] OR  
10 "relationship therapy"[Title/Abstract] OR "relationship therapies"[Title/Abstract] OR  
11 relaxation[Title/Abstract] OR "reminiscence therapy"[Title/Abstract] OR "reminiscence  
12 therapies"[Title/Abstract] OR rogerian[Title/Abstract] OR "role play"[Title/Abstract] OR "role  
13 plays"[Title/Abstract] OR "role playing"[Title/Abstract] OR "self analysis"[Title/Abstract] OR "self  
14 analysing"[Title/Abstract] OR "self esteem"[Title/Abstract] OR "sensitivity training"[Title/Abstract] OR  
15 "sex therapy"[Title/Abstract] OR "sex therapies"[Title/Abstract] OR "sleep phase  
16 chronotherapy"[Title/Abstract] OR "sleep phase chronotherapies"[Title/Abstract] OR "social skills  
17 education"[Title/Abstract] OR "social skills training"[Title/Abstract] OR "socioenvironmental  
18 therapy"[Title/Abstract] OR "socioenvironmental therapies"[Title/Abstract] OR  
19 sociotherapy[Title/Abstract] OR sociotherapies[Title/Abstract] OR "solution focused"[Title/Abstract]  
20 OR "stress management"[Title/Abstract] OR "support group"[Title/Abstract] OR "support  
21 groups"[Title/Abstract] OR "supportive therapy"[Title/Abstract] OR "supportive  
22 therapies"[Title/Abstract] OR "systematic desensitization"[Title/Abstract] OR "systematic  
23 desensitisation"[Title/Abstract] OR "systemic therapy"[Title/Abstract] OR "systemic  
24 therapies"[Title/Abstract] OR "therapeutic community"[Title/Abstract] OR "therapeutic  
25 communities"[Title/Abstract] OR "transactional analysis"[Title/Abstract] OR  
26 transference[Title/Abstract] OR transtheoretical[Title/Abstract] OR "validation  
27 therapy"[Title/Abstract] OR "validation therapies"[Title/Abstract]) AND (((randomized controlled  
28 trial[pt]) OR (controlled clinical trial[pt]) OR (randomized[tiab]) OR (placebo[tiab]) OR (drug  
29 therapy[sh]) OR (randomly[tiab]) OR (trial[tiab]) OR (groups[tiab])) NOT (animals[mh] NOT  
30 humans[mh]))

31  
32  
33  
34  
35  
36  
37  
38  
39  
40  
41  
42  
43  
44  
45  
46  
47  
48  
49  
50  
51  
52  
53  
54  
55  
56  
57  
58  
59  
60

**PRISMA-P (Preferred Reporting Items for Systematic review and Meta-Analysis Protocols) 2015 checklist: recommended items to address in a systematic review protocol\***

| Section and topic                 | Item No | Checklist item                                                                                                                                                                                                                | Reported on page   |
|-----------------------------------|---------|-------------------------------------------------------------------------------------------------------------------------------------------------------------------------------------------------------------------------------|--------------------|
| <b>ADMINISTRATIVE INFORMATION</b> |         |                                                                                                                                                                                                                               |                    |
| Title:                            |         |                                                                                                                                                                                                                               |                    |
| Identification                    | 1a      | Identify the report as a protocol of a systematic review                                                                                                                                                                      | 1 (title)          |
| Update                            | 1b      | If the protocol is for an update of a previous systematic review, identify as such                                                                                                                                            | -                  |
| Registration                      | 2       | If registered, provide the name of the registry (such as PROSPERO) and registration number                                                                                                                                    | 2                  |
| Authors:                          |         |                                                                                                                                                                                                                               |                    |
| Contact                           | 3a      | Provide name, institutional affiliation, e-mail address of all protocol authors; provide physical mailing address of corresponding author                                                                                     | 1                  |
| Contributions                     | 3b      | Describe contributions of protocol authors and identify the guarantor of the review                                                                                                                                           | 16                 |
| Amendments                        | 4       | If the protocol represents an amendment of a previously completed or published protocol, identify as such and list changes; otherwise, state plan for documenting important protocol amendments                               | 5                  |
| Support:                          |         |                                                                                                                                                                                                                               |                    |
| Sources                           | 5a      | Indicate sources of financial or other support for the review                                                                                                                                                                 | 16-17              |
| Sponsor                           | 5b      | Provide name for the review funder and/or sponsor                                                                                                                                                                             | 16-17              |
| Role of sponsor or funder         | 5c      | Describe roles of funder(s), sponsor(s), and/or institution(s), if any, in developing the protocol                                                                                                                            | 16-17              |
| <b>INTRODUCTION</b>               |         |                                                                                                                                                                                                                               |                    |
| Rationale                         | 6       | Describe the rationale for the review in the context of what is already known                                                                                                                                                 | 3                  |
| Objectives                        | 7       | Provide an explicit statement of the question(s) the review will address with reference to participants, interventions, comparators, and outcomes (PICO)                                                                      | 5                  |
| <b>METHODS</b>                    |         |                                                                                                                                                                                                                               |                    |
| Eligibility criteria              | 8       | Specify the study characteristics (such as PICO, study design, setting, time frame) and report characteristics (such as years considered, language, publication status) to be used as criteria for eligibility for the review | 5-8                |
| Information sources               | 9       | Describe all intended information sources (such as electronic databases, contact with study authors, trial registers or other grey literature sources) with planned dates of coverage                                         | 8                  |
| Search strategy                   | 10      | Present draft of search strategy to be used for at least one electronic database, including planned limits, such that it could be repeated                                                                                    | Supplementary file |
| Study records:                    |         |                                                                                                                                                                                                                               |                    |

|                                    |     |                                                                                                                                                                                                                                                  |           |
|------------------------------------|-----|--------------------------------------------------------------------------------------------------------------------------------------------------------------------------------------------------------------------------------------------------|-----------|
| Data management                    | 11a | Describe the mechanism(s) that will be used to manage records and data throughout the review                                                                                                                                                     | 8-9       |
| Selection process                  | 11b | State the process that will be used for selecting studies (such as two independent reviewers) through each phase of the review (that is, screening, eligibility and inclusion in meta-analysis)                                                  | 8-9       |
| Data collection process            | 11c | Describe planned method of extracting data from reports (such as piloting forms, done independently, in duplicate), any processes for obtaining and confirming data from investigators                                                           | 9         |
| Data items                         | 12  | List and define all variables for which data will be sought (such as PICO items, funding sources), any pre-planned data assumptions and simplifications                                                                                          | 9         |
| Outcomes and prioritization        | 13  | List and define all outcomes for which data will be sought, including prioritization of main and additional outcomes, with rationale                                                                                                             | 7-8       |
| Risk of bias in individual studies | 14  | Describe anticipated methods for assessing risk of bias of individual studies, including whether this will be done at the outcome or study level, or both; state how this information will be used in data synthesis                             | 10        |
| Data synthesis                     | 15a | Describe criteria under which study data will be quantitatively synthesised                                                                                                                                                                      | 9         |
|                                    | 15b | If data are appropriate for quantitative synthesis, describe planned summary measures, methods of handling data and methods of combining data from studies, including any planned exploration of consistency (such as $I^2$ , Kendall's $\tau$ ) | 9, 11, 12 |
|                                    | 15c | Describe any proposed additional analyses (such as sensitivity or subgroup analyses, meta-regression)                                                                                                                                            | 12        |
|                                    | 15d | If quantitative synthesis is not appropriate, describe the type of summary planned                                                                                                                                                               | -         |
| Meta-bias(es)                      | 16  | Specify any planned assessment of meta-bias(es) (such as publication bias across studies, selective reporting within studies)                                                                                                                    | 12, 13    |
| Confidence in cumulative evidence  | 17  | Describe how the strength of the body of evidence will be assessed (such as GRADE)                                                                                                                                                               | 13        |

**\* It is strongly recommended that this checklist be read in conjunction with the PRISMA-P Explanation and Elaboration (cite when available) for important clarification on the items. Amendments to a review protocol should be tracked and dated. The copyright for PRISMA-P (including checklist) is held by the PRISMA-P Group and is distributed under a Creative Commons Attribution Licence 4.0.**

*From: Shamseer L, Moher D, Clarke M, Ghersi D, Liberati A, Petticrew M, Shekelle P, Stewart L, PRISMA-P Group. Preferred reporting items for systematic review and meta-analysis protocols (PRISMA-P) 2015: elaboration and explanation. BMJ. 2015 Jan 2;349(jan02 1):g7647.*



# BMJ Open

## Psychological interventions for positive symptoms in schizophrenia: protocol for a network meta-analysis of randomized controlled trials

|                                 |                                                                                                                                                                                                                                                                                                                                                                                                                                                                                                                                                                                                                                                                                                                                                                                                                                                                                                                                                                                          |
|---------------------------------|------------------------------------------------------------------------------------------------------------------------------------------------------------------------------------------------------------------------------------------------------------------------------------------------------------------------------------------------------------------------------------------------------------------------------------------------------------------------------------------------------------------------------------------------------------------------------------------------------------------------------------------------------------------------------------------------------------------------------------------------------------------------------------------------------------------------------------------------------------------------------------------------------------------------------------------------------------------------------------------|
| Journal:                        | <i>BMJ Open</i>                                                                                                                                                                                                                                                                                                                                                                                                                                                                                                                                                                                                                                                                                                                                                                                                                                                                                                                                                                          |
| Manuscript ID                   | bmjopen-2017-019280.R1                                                                                                                                                                                                                                                                                                                                                                                                                                                                                                                                                                                                                                                                                                                                                                                                                                                                                                                                                                   |
| Article Type:                   | Protocol                                                                                                                                                                                                                                                                                                                                                                                                                                                                                                                                                                                                                                                                                                                                                                                                                                                                                                                                                                                 |
| Date Submitted by the Author:   | 09-Nov-2017                                                                                                                                                                                                                                                                                                                                                                                                                                                                                                                                                                                                                                                                                                                                                                                                                                                                                                                                                                              |
| Complete List of Authors:       | Bighelli, Irene; Klinikum rechts der Isar der Technischen Universität München, Department of Psychiatry and Psychotherapy<br>Salanti, Georgia; University of Bern, Institute of Social and Preventive Medicine (ISPM)<br>Reitmair, Cornelia; Klinikum rechts der Isar der Technischen Universität München, Department of Psychiatry and Psychotherapy<br>Wallis, Sofia; Klinikum rechts der Isar der Technischen Universität München, Department of Psychiatry and Psychotherapy<br>Barbui, Corrado; University of Verona, WHO Collaborating Centre for Research and Training in Mental Health and Service Evaluation, Department of Neuroscience, Biomedicine and Movement Sciences, Section of Psychiatry<br>Furukawa, Toshi; Kyoto University, Department of Health Promotion and Human Behavior, Graduate School of Medicine and School of Public Health<br>Leucht, Stefan; Klinikum rechts der Isar der Technischen Universität München, Department of Psychiatry and Psychotherapy |
| <b>Primary Subject Heading</b>: | Mental health                                                                                                                                                                                                                                                                                                                                                                                                                                                                                                                                                                                                                                                                                                                                                                                                                                                                                                                                                                            |
| Secondary Subject Heading:      | Mental health                                                                                                                                                                                                                                                                                                                                                                                                                                                                                                                                                                                                                                                                                                                                                                                                                                                                                                                                                                            |
| Keywords:                       | Schizophrenia & psychotic disorders < PSYCHIATRY, Adult psychiatry < PSYCHIATRY, Psychological interventions, Network Meta-Analysis, Psychotherapy                                                                                                                                                                                                                                                                                                                                                                                                                                                                                                                                                                                                                                                                                                                                                                                                                                       |
|                                 |                                                                                                                                                                                                                                                                                                                                                                                                                                                                                                                                                                                                                                                                                                                                                                                                                                                                                                                                                                                          |

SCHOLARONE™  
Manuscripts

# Psychological interventions for positive symptoms in schizophrenia: protocol for a network meta-analysis of randomized controlled trials

Irene Bighelli<sup>1\*</sup>, Georgia Salanti<sup>2</sup>, Cornelia Reitmeir<sup>1</sup>, Sofia Wallis<sup>1</sup>, Corrado Barbui<sup>3</sup>, Toshi A. Furukawa<sup>4</sup>, Stefan Leucht<sup>1</sup>

<sup>1</sup> Department of Psychiatry and Psychotherapy, Klinikum rechts der Isar, Technical University of Munich, Germany

<sup>2</sup> Institute of Social and Preventive Medicine (ISPM), University of Bern, Switzerland

<sup>3</sup> WHO Collaborating Centre for Research and Training in Mental Health and Service Evaluation, Department of Neuroscience, Biomedicine and Movement Sciences, Section of Psychiatry, University of Verona, Italy

<sup>4</sup> Department of Health Promotion and Human Behavior, Kyoto University Graduate School of Medicine / School of Public Health, Japan

\*Corresponding author

Department of Psychiatry and Psychotherapy  
Klinikum rechts der Isar, Technische Universität München  
Ismaningerstr. 22, 81675 München, Germany  
E-mail: [irene.bighelli@tum.de](mailto:irene.bighelli@tum.de)

[GS: georgia.salanti@ispm.unibe.ch](mailto:gsalanti@ispm.unibe.ch)

[CR: cornelia.reitmeir@tum.de](mailto:cornelia.reitmeir@tum.de)

[SW: sofia.wallis@tum.de](mailto:sofia.wallis@tum.de)

[CB: corrado.barbui@univr.it](mailto:corrado.barbui@univr.it)

[TAF: furukawa@kuhp.kyoto-u.ac.jp](mailto:furukawa@kuhp.kyoto-u.ac.jp)

[SL: stefan.leucht@tum.de](mailto:stefan.leucht@tum.de)

## ABSTRACT

### Introduction

There is rising awareness that we need multi-disciplinary approaches integrating psychological treatments for schizophrenia, but a comprehensive evidence base on their relative efficacy is lacking. We will conduct a network meta-analysis (NMA), integrating direct and indirect comparisons from randomised controlled trials (RCTs) to rank psychological treatments for schizophrenia according to their efficacy, acceptability and tolerability.

### Methods and analysis

We will include all RCTs comparing a psychological treatment aimed at positive symptoms of schizophrenia with another psychological intervention or with a no treatment condition (waiting list, treatment as usual). We will include studies on adult patients with schizophrenia, excluding specific subpopulations (e.g. first episode patients, or patients with psychiatric comorbidities). Primary outcome will be the change in positive symptoms on a published rating scale. Secondary outcomes will be acceptability (dropout), change in overall and negative symptoms of schizophrenia, response, relapse, adherence, depression, quality of life, functioning and adverse events. Published and unpublished studies will be sought through database searches, trial registries and websites. Study selection and data extraction will be conducted by at least two independent reviewers. We will conduct random-effects NMA to synthesize all evidence for each outcome and obtain a comprehensive ranking of all treatments. NMA will be conducted in Stata and R within a frequentist framework. The risk of bias in studies will be evaluated using the Cochrane Risk of Bias tool and the credibility of the evidence will be evaluated using an adaptation of the GRADE framework to NMA, recommended by the Cochrane guidance. Subgroup and sensitivity analyses will be conducted to assess the robustness of the findings.

### Ethics and dissemination

No ethical issues are foreseen. Results from this study will be published in peer-reviewed journals and presented at relevant conferences.

**PROSPERO registration number:** CRD42017067795

### STRENGTHS AND LIMITATIONS OF THIS STUDY

- We will conduct a random-effects network meta-analysis to synthesize all available published or unpublished randomized controlled trials for each pre-specified outcome, and obtain a comprehensive ranking of all treatments.
- This will be the first network meta-analysis on psychological treatments for schizophrenia; the findings from this study have the potential to inform and influence clinical decision-making and guideline development.
- The risk of heterogeneity and inconsistency is high, given the different psychological interventions that will be included: however, we try to control variability by carefully framing the inclusion criteria about population and interventions, and we will evaluate consistency employing local as well as global methods.

- The limitations of primary studies will be addressed with the Cochrane risk of bias tool and the quality of evidence for network estimates will be assessed with an appropriate adaptation of the GRADE framework; these approaches are considered the gold standard for critical appraisal of evidence quality.

## INTRODUCTION

Schizophrenia is a debilitating, and often life-long disorder that ranks among the top 20 causes of disability according to the World Health Report (1). Although pharmacological interventions have been the mainstay of treatment for schizophrenia, antipsychotics have a number of limitations (limited response, high incidence of disabling side effects, poor adherence to treatment) (2) and are problematic in many situations (such as medical comorbidities, tolerability problems and pregnancy). Besides, there has been growing recognition of the importance of psychological processes in psychosis, both as contributors to onset and persistence, and in terms of the negative psychological impact of a diagnosis of schizophrenia on the individual's well-being, psychosocial functioning and life opportunities. Psychological interventions for psychosis and schizophrenia have been developed to address these aspects, and, in accordance with guidelines from the National Institute for Health and Care Excellence in the United Kingdom (3) and the Schizophrenia Patient Outcomes Research Team in the United States (4), psychological treatments are widely regarded as a necessary intervention for schizophrenia.

A broad range of interventions that can be defined as "psychological" have been studied in the treatment of schizophrenia. These interventions can be provided at different stages of the illness and address different aspects, like social and cognitive functioning, adherence to medication and symptoms of schizophrenia. Table 1 presents the panorama of existing systematic reviews of randomized controlled trials that have been conducted on the topic. These reviews have mainly included studies comparing the intervention under examination with so called no treatment conditions (waiting-list, treatment as usual (TAU)) (5, 6). Other reviews included also active comparisons with other psychological treatments (7–9). An attempt to provide information on active comparisons was made by Turner and colleagues, who performed separate meta-analysis when there were at least five eligible randomized controlled trials comparing one intervention to another psychological intervention (10). However, all the available reviews applied pairwise meta-analysis as a method, being able to pool results only when a comparison of two treatments was considered in existing studies. The comparative efficacy and tolerability of the existing interventions has not been checked yet; as a result, it is still currently unclear which are the most efficacious, the most acceptable and the best tolerable psychological treatments for schizophrenia.

To overcome this gap in the current knowledge, a network meta-analysis would be necessary to consider both direct and indirect comparisons, and produce hierarchies of the effects of the various psychological treatments in the various efficacy and tolerability outcomes. Such hierarchies are essential for guidelines, which should ideally be able to indicate which treatment is likely to be the best, the second best and so on for a given outcome. Only the method of network meta-analysis can provide such hierarchies by combining all the randomised evidence. Our aim is to produce such a network meta-analysis of all psychological interventions for schizophrenia in multiple outcomes. We focus here on the interventions primarily aimed at treating positive symptoms in the acute phase of the illness.

| Intervention                                                                                                                        | Existing reviews                               | RCT* | Comparator                                                                                                                                                                                                                                                                                                             |
|-------------------------------------------------------------------------------------------------------------------------------------|------------------------------------------------|------|------------------------------------------------------------------------------------------------------------------------------------------------------------------------------------------------------------------------------------------------------------------------------------------------------------------------|
| <b>Acceptance and commitment therapy</b>                                                                                            | Ongoing Cochrane review (11)                   | -    | TAU, pharmacological intervention, another psychosocial intervention                                                                                                                                                                                                                                                   |
| <b>Adherence interventions</b>                                                                                                      | Gray 2016 (12)                                 | 6    | TAU, didactic health education                                                                                                                                                                                                                                                                                         |
| <b>Active comparisons (Befriending, CBT, Cognitive remediation, Psychoeducation, Social skills training, Supportive counseling)</b> | Turner 2014 (10)                               | 48   | Befriending, CBT, Cognitive remediation, Psychoeducation, Social skills training, Supportive counseling, Family intervention, Art therapy, Body psychotherapy, Occupational therapy, Problem-solving therapy                                                                                                           |
| <b>Art therapy</b>                                                                                                                  | Ruddy 2005 (6)                                 | 2    | Standard care                                                                                                                                                                                                                                                                                                          |
| <b>Assertive community treatment</b>                                                                                                | Marshall 1998 (13)                             | 20** | TAU, hospital-based rehabilitation, case management                                                                                                                                                                                                                                                                    |
| <b>Befriending</b>                                                                                                                  | -                                              |      |                                                                                                                                                                                                                                                                                                                        |
| <b>Bibliotherapy</b>                                                                                                                | -                                              |      |                                                                                                                                                                                                                                                                                                                        |
| <b>Body oriented psychological therapy</b>                                                                                          | -                                              |      |                                                                                                                                                                                                                                                                                                                        |
| <b>Case management</b>                                                                                                              | Dieterich 2017 (14)                            | 40** | Assertive Community Treatment, Assertive Outreach model, Case Management model, standard community care                                                                                                                                                                                                                |
|                                                                                                                                     | Zimmermann 2005 (positive symptoms) (9)        | 15   | Waiting-list, TAU or another therapeutic treatment                                                                                                                                                                                                                                                                     |
|                                                                                                                                     | Jones 2012 (7)                                 | 20   | Active (Psychoeducation, Family Intervention, Supportive Psychotherapy, Supportive Counselling, Cognitive Remediation) and nonactive control treatments (Recreation and support, social activities, befriending, non-specific counselling)                                                                             |
| <b>Cognitive behavioural therapy</b>                                                                                                | Jauhar 2013 (15)                               | 52   | Waiting list, TAU or an intervention designed to control for the non-specific effects of psychotherapy (recreation and support, group support, befriending, supportive counselling/therapy, social activity therapy and goal-focused supportive contact) or active treatments (cognitive remediation, psychoeducation) |
|                                                                                                                                     | Van der Gaag 2014 (individually tailored) (16) | 18   | Any control condition was accepted                                                                                                                                                                                                                                                                                     |
|                                                                                                                                     | Hazell 2016 (low intensity) (17)               | 8    | TAU, supportive psychotherapy                                                                                                                                                                                                                                                                                          |
|                                                                                                                                     | Kennedy 2016 (auditory hallucinations) (18)    | 2    | Non-specialized therapy (focused on supportive interactions and social integration)                                                                                                                                                                                                                                    |
| <b>Cognitive remediation</b>                                                                                                        | Cella 2016 (19)                                | 45   | TAU, active control (e.g. computer games) another active treatment (e.g. CBT)                                                                                                                                                                                                                                          |
| <b>Dance therapy</b>                                                                                                                | Ren 2013 (20)                                  | 1    | Standard care plus supportive counselling                                                                                                                                                                                                                                                                              |
| <b>Family interventions</b>                                                                                                         | Pitschel-Walz 2001 (21)                        | 25   | TAU, patient intervention, other family interventions                                                                                                                                                                                                                                                                  |
|                                                                                                                                     | Pharoah 2006 (22)                              | 25   | TAU, discussion groups, psychoeducation, supportive psychotherapy, psychosocial support                                                                                                                                                                                                                                |
| <b>Group psychotherapeutic treatments</b>                                                                                           | Orfanos 2015 (23)                              | 34   | TAU, other groups (active discussion group, support group, counselling group, occupational                                                                                                                                                                                                                             |

|                                                                                        |                       |      |                                                                                                                                                                                                                   |
|----------------------------------------------------------------------------------------|-----------------------|------|-------------------------------------------------------------------------------------------------------------------------------------------------------------------------------------------------------------------|
|                                                                                        |                       |      | therapy group or problem-solving discussion group)                                                                                                                                                                |
| <b>Integrated psychological Therapy (IPT)</b>                                          | Roder 2006 (24)       | 16   | TAU, placebo-attention condition, other active treatments                                                                                                                                                         |
| <b>Psychological and psychosocial interventions for negative symptoms in psychosis</b> | Lutgens 2017 (8)      | 95   | TAU, active comparator (including psychoeducation, supportive therapy, cognitive remediation)                                                                                                                     |
| <b>Metacognitive training</b>                                                          | Eichner 2016 (25)     | 12   | TAU, Wait list control, Supportive Therapy, Newspaper discussion group, CogPack (=Cognitive remediation)                                                                                                          |
| <b>Mindfulness</b>                                                                     | Aust 2017 (26)        | 11** | Active control intervention (e.g. Befriending, Progressive Muscle Relaxation), TAU                                                                                                                                |
| <b>Music therapy</b>                                                                   | Geretsegger 2017 (27) | 18   | Placebo defined as an alternative therapy designed to control for effects of the therapist's attention; TAU or no treatment                                                                                       |
| <b>Psychodynamic therapy</b>                                                           | Malmberg 2012 (28)    | 4    | Reality-adaptive, supportive psychotherapy, Hospital comparison, Ataraxic drugs, electro convulsive therapy, Milieu therapy, individual vs. group                                                                 |
| <b>Psychoeducation</b>                                                                 | Pekkala 2006 (29)     | 10   | TAU, supportive psychotherapy, behavioral intervention, leisure-time group                                                                                                                                        |
| <b>Social skills training</b>                                                          | Almerie 2015 (30)     | 13   | TAU, structured activities, discussion group, interaction group, no treatment control                                                                                                                             |
| <b>Supportive therapy</b>                                                              | Buckley 2015 (31)     | 24   | Standard care, any other treatment (biological, psychological or social) such as medication, problem-solving therapy, psychoeducation, social skills training, CBT, family therapy or psychodynamic psychotherapy |
| <b>Systemic therapy</b>                                                                | Pinquart 2016 (5)     | 7    | No treatment                                                                                                                                                                                                      |

**Table 1.** Existing reviews about psychological treatments for schizophrenia.

RCT: randomized controlled trial; TAU: treatment as usual.

\*number of RCTs on schizophrenic patients; \*\*RCTs about patients with severe mental illness including schizophrenia

## Objectives

To estimate relative treatment effects and obtain a hierarchy for the psychological treatments in patients with schizophrenia, in terms of:

1. Efficacy on positive symptoms
2. Acceptability
3. Other efficacy measures, such as overall symptoms, negative symptoms, response, relapse, adherence, depression, quality of life, functioning
4. Tolerability.

## METHODS AND ANALYSIS

### Criteria for considering studies for this review

Methods for this systematic review have been developed according to the Preferred Reporting Items for Systematic review and Meta-Analysis Protocols (PRISMA-P) checklist, and the PRISMA extension statement for reporting of systematic reviews incorporating network meta-analyses of healthcare interventions (32, 33). This systematic review and NMA is registered in the PROSPERO database

(registration number: CRD42017067795); the record in PROSPERO will be updated with any amendment made to the protocol.

### *Types of studies*

We will include all randomised trials (RCTs) in which participants with schizophrenia received a psychological intervention as defined below (see *Types of interventions*). Studies whose sequence generation was at high risk of bias (e.g. randomization by the date of birth or day of the week) will be excluded. We will accept open and blinded RCTs; this choice is particularly relevant in trials on psychological interventions, in which in best case only the assessor of outcome can be blind, but not the therapist. Open RCTs will be excluded in a sensitivity analysis. We will include both trials in which psychological interventions were compared with a control condition and trials in which they were compared with another intervention. There will be no language restriction in order to avoid the problem of 'language bias' (34). In case we retrieve references in languages in which we are not fluent, study authors will be contacted to check inclusion criteria and eventually ask for study data. As an exception, we will not search Chinese databases, since serious concerns have been raised on the trustworthiness of Chinese trials found in these databases (35, 36). Chinese studies found in Western databases will be considered for inclusion. In the case of cross-over studies we will use only the first cross-over phase in order to avoid the problem of carry-over effects which are very likely in schizophrenia and with psychological treatments. We will exclude cluster randomized trials.

### *Types of participants*

Our aim is to collect information on the efficacy of psychological treatments on patients with positive symptoms. In order to select this population, we operationalized the inclusion criteria as follows. We will include adults, however defined by study authors, with a diagnosis of schizophrenia or related disorders (such as schizophreniform, or schizoaffective disorders); there is no clear evidence that the latter schizophrenia-like psychoses are caused by fundamentally different disease processes or require different treatment approaches (37). We will include trials irrespective of the diagnostic criteria used. Here we will follow the strategy of the Cochrane Schizophrenia Group (38) to include not only studies that used specific diagnostic criteria such as ICD-10 or DSM-V, because these criteria are not meticulously used in clinical routine either. This decision should increase generalizability and representativeness.

Studies including participants with other diagnoses part of the psychosis spectrum will be included only if participants with a diagnosis of schizophrenia, schizophreniform or schizoaffective disorders were more than 80% of the participants considered. We will include studies recruiting patients with positive symptoms, either delusions, hallucinations or both, or in the phase of acute exacerbation of positive symptoms, however defined by inclusion criteria of the trial.

We will exclude studies focused on specific subpopulations of patients, such as (1) studies recruiting patients in which negative symptoms are predominant, according to authors' definition, (2) studies on patients with comorbid psychiatric disorders including substance abuse, (3) studies recruiting patients with concomitant medical illnesses, (4) trials enrolling stable patients (relapse prevention studies), (5) studies on first episode patients, (6) trials on patients who show prodromal signs of psychosis (also defined as "at risk for psychosis").

### *Types of interventions*

1  
2  
3 Any psychological intervention that occurs through interaction between therapist and patient, either  
4 face-to-face individually or in group, with the primary aim to reduce positive symptoms.  
5 Interventions with an explicit primary aim different from positive symptoms (e.g. functioning,  
6 cognition, adherence to medication, knowledge of the illness) will be excluded. The identified  
7 treatments will be classified after identification of eligible studies. Psychological treatments will be  
8 compared to each other and to any non-pharmacological control condition considered in the  
9 included studies. Comparators will include the so called “treatment as usual”, waiting list and inactive  
10 treatments. The effect of “non-active” comparators will be analysed in a sensitivity analysis (39).  
11 Patients also receiving treatment as usual, including pharmacological interventions, will be included.  
12 If psychological treatments that we do not include among the interventions (e.g. psychoeducation,  
13 supportive therapy) are used as control condition in the studies, they will be included as nodes in  
14 order to strengthen the network, but will not be part of our decision set.  
15  
16  
17

### 18 *Outcome measures*

19 Outcomes will be measured at study endpoint, as defined in each study.  
20  
21  
22

### 23 **Primary outcome**

24  
25 Change in positive symptoms of schizophrenia, examined accordingly to the respective subscale of  
26 the Positive and Negative Syndrome Scale (PANSS), the Brief Psychiatric Rating Scale (BPRS) or the  
27 Scales for Assessment of Positive Symptoms (SAPS) or any other published scale.  
28

29 As not all studies will have used the same scale, we will extract data according to the following  
30 hierarchy: mean change of the PANSS positive symptoms subscale from baseline to endpoint, if not  
31 available mean change of the BPRS positive symptoms subscale, or if again not available the mean  
32 values at endpoint of the PANSS/BPRS positive symptoms subscale. The results of other rating scales  
33 will only be used if the instrument has been published in a peer-reviewed journal, because it has  
34 been shown that non-validated schizophrenia scales exaggerate differences (40).  
35  
36

### 37 **Secondary outcomes**

38 Given the focus on treatments for positive symptoms, the results of this review will be informative  
39 for the treatment of positive symptoms. They will also describe how these interventions can have an  
40 effect on a number of other outcomes. With this aim, the following secondary outcomes will be  
41 assessed:  
42  
43

- 44 1. Acceptability, defined as the percentage of patients leaving the study early (‘dropout’) for  
45 any reason. All-cause discontinuation due to any reason combines efficacy, tolerability,  
46 and other factors and can therefore be considered as a measure of ‘acceptability of  
47 treatment’ (38) or of overall “effectiveness”;
- 48 2. Change in overall symptoms, measured by rating scales such as the PANSS or the BPRS, or  
49 any other published scale (e.g. the Manchester Scale) for the assessment of overall  
50 schizophrenic symptomatology. The results of other rating scales will only be used if the  
51 instrument has been published in a peer-reviewed journal;
- 52 3. Change in negative symptoms, measured by the respective subscale of the PANSS, or the  
53 “Scales for Assessment of Negative Symptoms” (SANS) or any other published scale;  
54  
55  
56  
57



4. Response, measured by the percentage of responders defined by reduction on the PANSS, BPRS or CGI scores, accepting the criteria used by study authors;
5. Percentage of patients with relapse, by definitions operationalized by rating scales, and, if not available, number of rehospitalisations due to psychopathology. We will not include data from studies that used non-operationalized relapse criteria (e.g. “clinical judgement”);
6. Adherence, measured by any published rating scale (e.g. “Adherence Therapy Patients Satisfaction Questionnaire”, “Adherence Rating Scale”);
7. Depression, measured by the Calgary Depression Scale for Schizophrenia, the Hamilton Depression Rating Scale, the Montgomery Asberg Depression Scale or other published symptom scales;
8. Quality of life, measured by any published rating scale (e.g. “Heinrichs quality of life scale”, Quality of Life Scale (QOLS));
9. Functioning, measured by rating scales such as the Global Assessment of Functioning or the Psychosocial Performance Scale, or any other published rating scale.
10. Tolerability, measured as the percentage of patients experiencing adverse events. Adverse events associated with psychological treatments are not covered as comprehensively as in trials on pharmacological treatments (41). However, there is a raising awareness of the importance of considering possible harms associated with psychological interventions (42). Therefore we will collect any available information in clinical studies about this outcome, using a classification proposed by Linden and colleagues (42): a) emergence of new symptoms; b) deterioration of existing symptoms; c) lack of improvement or deterioration of illness; d) prolongation of treatment; e) patient’s non-compliance; f) strains in the patient-therapist relationship; g) very good patient-therapist relationship, therapy dependency; h) strains or changes in family relations; i) strains or changes in work relations; l) any change in the life circumstances of the patient; m) stigmatization. Suicide attempts and any other possible adverse event related to psychological treatment will also be considered.
11. Mortality. Psychosocial treatments may actually reduce or, by contrast, increase overall mortality, in particular connected to suicidality. To test this, we will examine this outcome in terms of a) death for any reason, b) death due to natural causes and c) due to suicide.

## Search strategy

### *Electronic searches*

The following sources will be searched without restrictions for language or publication period: EMBASE, MEDLINE, PsycINFO, PUBMED. The search terms that will be used for PubMed are provided as Supplement material. We will also search the following international databases:

1. WHO International Clinical Trials Registry Platform (ICTRP)
2. BIOSIS
3. Cochrane Collaboration Controlled Trials Register
4. ClinicalTrials.gov.

### *Reference lists and other sources*

References of all selected studies will be inspected for other published reports and citations of unpublished studies. We will also inspect previous reviews conducted on psychological treatments for schizophrenia to check if some studies meet our inclusion criteria as well. In addition, we will contact the first author of each included study published in the last 30 years for missing information about their studies.

## Identification and selection of studies

Studies identified through electronic and manual searches will be listed with citation, titles and abstracts, in Citavi; duplicates will be excluded. The eligibility for inclusion process will be conducted in two separate stages:

1. Two authors will independently inspect title and abstracts identified in the literature searches, and exclude those not pertinent. Disagreement will be resolved by discussion, and where doubt still remains, we will acquire the full article for further inspection and the article will proceed to the next stage;
2. Once the full articles are obtained, two reviewers will independently assess them for eligibility. Disagreements will be resolved by discussion, and, if needed, a third senior author will be involved. When required, further information will be obtained from study authors.

## Data extraction

Two authors will independently extract data from all selected trials. When disagreement arises we will resolve it by discussion and, if needed, involving a third senior author. Where this is not sufficient we will contact the study authors.

The following data will be collected from each included study:

- Study citation, year(s) of study, registration number to trials registries, year of publication, location, setting, number of centers, sample size, diagnostic criteria, funding/sponsor (industry or academic);
- Methodology, including study design (type of RCT), number of arms, risk of bias (see below);
- Characteristics of study participants, including gender, age, details on diagnosis, number randomized to each arm, sociodemographic characteristics, whether psychological treatments naïve at baseline, or with previous experience with the experimental intervention);
- Characteristics of intervention, including number and frequency of sessions, therapy setting, expertise of therapist, researcher allegiance at study arm level;
- Outcome measures, including information on whether an Intention to Treat (ITT) approach has been used and how it was defined.

The two reviewers will independently input data into an Access database especially created for this study. The software will automatically detect any inconsistencies, and they will be resolved by discussion.

## *Measurement of treatment effect*

Relative treatment effects

- Continuous outcomes: For continuous outcomes we will use the standardized mean difference (SMD), because we expect that the studies use different rating scales of overall schizophrenia symptomatology.
- Dichotomous outcomes: The effect size for dichotomous outcomes will be the risk ratio (RR) and its 95% confidence intervals (CIs).

### Relative treatment ranking

We will estimate the probability for each intervention to be ranked at each possible place, given the relative effect sizes as estimated in NMA. As described in Salanti et al (43) we will obtain a hierarchy of the competing interventions using the Surface Under the Cumulative Ranking curve (SUCRA) and mean ranks. SUCRA values will be expressed as percentage, showing the relative probability of an intervention to be among the best options.

### *Dealing with missing outcome data and missing statistics*

For continuous outcomes we will extract data for all randomized patients if possible, and we will give preference to data based on mixed-effect models of repeated measurements of multiple imputations over last-observation-carried-forward data.

We will use published standard deviations (SDs), where available. When standard errors instead of SDs are presented, the former will be converted to SDs (44). If both are missing we will estimate SDs from p-values or confidence intervals, as described in Section 7.7.3 of the Cochrane Handbook for Systematic Reviews (45). If none of these options is viable we will contact the original authors. When no information can be obtained we will derive SDs from those of the other studies using a validated imputation technique (44).

For dichotomous outcomes, everyone allocated to the intervention will be counted whether they completed the follow up or not. If the authors applied such a strategy, we will use their results. If the original authors presented only the results of the per-protocol or completer population, we will assume that those participants lost to follow-up would not have changed in a given outcome. In terms of efficacy this means that they would be conservatively considered to have not responded to treatment or control. In terms of tolerability it would mean that participants would not have developed a side-effect.

### **Risk of bias assessment**

Risk of bias will be assessed for each included study using the Cochrane Collaboration 'risk of bias' tool (45, 46). The following domains will be considered:

1. Sequence generation: was the allocation sequence adequately generated?
2. Allocation concealment: was allocation adequately concealed?
3. Blinding of participants: was knowledge of the allocated treatment adequately prevented during the study? Given the peculiarity of the included studies, in which the therapist cannot be blind, we will consider under this item only if a way was found to keep patients unaware of the treatment they were receiving (even if we expect this will not be likely);
4. Blinding of outcome assessors: were outcome evaluated by blind raters? Were adequate measures taken to prevent them to discover treatment allocation during the study?
5. Incomplete outcome data: were incomplete outcome data adequately addressed?
6. Selective reporting: are reports of the study free from suggestion of selective outcome reporting?
7. Researcher's allegiance: do the researchers involved have a vested interest for the psychological treatment under investigation? We will additionally consider this point as possible source of bias, since it has been claimed to be relevant in trials on psychological interventions (47, 48, 49). An evaluation of high risk of bias will be given, for example, when the authors are founders of the therapy or have written a manual for that therapy.

1  
2  
3 A description of what was reported about the same domains in each study will be provided, and a  
4 judgement on the risk of bias will be made for each one of them, based on the following three  
5 categories: 'high risk of bias', 'low risk of bias' and 'unclear risk of bias' where information are not  
6 sufficient to make a judgement. Two independent review authors will assess the risk of bias in  
7 selected studies. Any disagreement will be resolved through discussion. Where necessary, the  
8 authors of the studies will be contacted for further information. Studies will be classified as having  
9 low risk of bias if none of the domains above was rated as high risk of bias and three or less were  
10 rated as unclear risk; moderate if one was rated as high risk of bias or none was rated as high risk of  
11 bias but four or more were rated as unclear risk, and all other cases will be assumed to pertain to  
12 high risk of bias (50). We will not include studies in the data analyses whose sequence generation  
13 was at high risk of bias (e.g. randomization by the date of birth or day of the week). Effects of high  
14 risk of bias in the other domains will be analyzed by sensitivity analyses.  
15  
16  
17

## 18 **Data analysis**

### 19 *Characteristics of the included studies*

20 We will produce descriptive statistics and study population characteristics across all eligible trials,  
21 describing the types of comparisons and other clinical or methodological variables, such as age,  
22 duration of illness, co-medication, country, duration of study and number of session.  
23  
24  
25

### 26 *Two-step procedure*

27 In a first step we will perform series of conventional pair-wise meta-analyses by combining studies  
28 that compared the same interventions, including the comparison between active treatments and the  
29 different control arms. In subgroups with very few RCTs available or if the requirements of network  
30 meta-analysis are not met it can be that network meta-analysis will not be appropriate and in this  
31 case, conventional pairwise meta-analysis will be the most straightforward approach. As  
32 heterogeneity is likely, a random effects model will be used. In a second step we will then perform a  
33 network meta-analysis within a frequentist framework.  
34  
35  
36

### 37 *Assessment of heterogeneity*

38 The heterogeneity (variability in relative treatment effects within the same treatment comparison)  
39 will be measured with the tau-squared (the variance of the random effects distribution). The  
40 heterogeneity variance will be assumed common across the various treatment comparisons (grouped  
41 by comparison type) and the empirical distributions will be used to characterize the amount of  
42 heterogeneity as low, moderate or high using the first and third quantiles (51–53). Potential reasons  
43 for heterogeneity will be explored by subgroup analysis (see below).  
44  
45  
46

### 47 *Assessment of the transitivity assumption*

48 Joint analysis of treatments can be misleading if the network is substantially intransitive. We assume  
49 that patients who fulfill the inclusion criteria outlined in criteria for considering studies for this  
50 review section are equally likely to be randomised to any of the interventions that we plan to  
51 compare. We will need to investigate the distribution of clinical and methodological variables that  
52 can act as effect modifiers across treatment comparisons (54). We have maximized the chances of  
53 transitivity in our network with regard to clinical variables by limiting our samples to participants  
54 with schizophrenia and excluding specific subgroups like first episode patients or patients with  
55 prevalent negative symptoms. Other clinical or methodological variables that may influence the  
56  
57  
58  
59

1  
2  
3 efficacy of psychological interventions include administration mode and frequency of the treatment  
4 (like number of sessions and experience of the therapist), baseline severity (see below, “Investigation  
5 of heterogeneity and inconsistency”), and blinding, which will also be assessed in sensitivity analyses.  
6 We will investigate if these variables are similarly distributed across studies grouped by comparison.  
7 The comparability of studies comparing the intervention with treatment as usual or waiting list  
8 conditions with those that provide head-to-head evidence will be examined carefully.  
9

### 10 11 *Network meta-analysis*

12 Network meta-analysis combines direct and indirect evidence for all relative treatment effects and  
13 can therefore provide estimates with maximum power and increased precision (55). If the collected  
14 studies appear to be sufficiently similar with respect to the distribution of effect modifiers (refer  
15 Assessment of transitivity assumption section), we will conduct a random-effects NMA to synthesize  
16 all evidence for each outcome, and obtain a comprehensive ranking of all treatments. We will  
17 assume a single heterogeneity parameter for each network. We will present the summary SMDs or  
18 RRs for all pairwise comparisons in a league table. We will also estimate the prediction intervals to  
19 assess how much the common heterogeneity affects the relative effect with respect to the extra  
20 uncertainty anticipated in a future study. To rank the various treatments for each outcome, we will  
21 use the surface under the cumulative ranking curve (SUCRA) and the mean ranks.  
22  
23  
24  
25

### 26 *Assessment of inconsistency*

27 The strategical and conceptual evaluation of transitivity will be supplemented with a statistical  
28 evaluation of consistency, the agreement between direct and indirect evidence. We will employ local  
29 as well as global methods to evaluate consistency (56). Local methods detect ‘hot spots’ of  
30 inconsistency, evidence loops that are inconsistent or comparisons for which direct and indirect  
31 evidence disagree. We will employ a method that separates direct evidence from indirect evidence  
32 provided by the entire network and then evaluate the agreement of these two pieces of evidence  
33 (57). We will also evaluate consistency in the entire network by calculating the design-by-treatment  
34 interaction test and I-squared for network heterogeneity, inconsistency, and for both (58). Tests for  
35 inconsistency are known to have low power, and empirical evidence has suggested that 10% of  
36 evidence loops published in the medical literature are expected to be inconsistent (60). Therefore,  
37 interpretation of the statistical inference about inconsistency will be carried out with caution and  
38 possible sources of inconsistency will be explored even in the absence of evidence for inconsistency.  
39  
40  
41  
42

### 43 *Investigation of heterogeneity and inconsistency*

44 We expect small amounts of heterogeneity and inconsistency to be present given the variety of study  
45 settings we plan to include. The following potential effect modifiers of the primary outcome will be  
46 explored by subgroup analyses:

- 47 a) Number of sessions
  - 48 b) Study duration
  - 49 c) Setting: individual vs group
  - 50 d) Expertise of the therapist
  - 51 e) Baseline severity (PANSS or BPRS score at baseline)
  - 52 f) Different types of patients, with a different clinical outline concerning symptoms (if identified).
- 53  
54  
55  
56

### 57 *Sensitivity analyses*

We will explore the following sensitivity analyses by excluding:

- a) studies in which the outcome assessor was not blind (open studies)
- b) studies that presented only completer analyses
- c) studies characterized as pertaining to high risk of bias
- d) studies with high risk of bias in researchers' allegiance
- e) studies focused on treatment resistant patients (study defined)
- f) studies with a non-active comparison group.

#### *Publication bias*

We will first examine funnel plots of pairwise MAs if there are 10 or more studies included. We will also explore the association between study size and effect size with a comparison-adjusted funnel plot that has been adapted to network meta-analysis (59).

#### *Evaluating the quality of the evidence*

The quality of evidence contributing to each network estimate will be evaluated using an adaptation of the Grading of Recommendations Assessment, Development and Evaluation (GRADE) framework specifically developed for network meta-analysis (56). We will characterize the credibility of a body of evidence based on the study limitations, imprecision, heterogeneity/inconsistency, indirectness, and publication bias.

#### *Statistical software*

The analysis and presentation of results will be performed using the Stata packages network and network\_graphs, the R package netmeta.

## **ETHICS AND DISSEMINATION**

This review does not require ethical approval. Findings will be published in peer reviewed scientific journals, granting open access, and the database will be made publicly available (in agreement with European Research Council Guidelines on Implementation of Open Access to Scientific Publications and Research Data ([http://ec.europa.eu/research/participants/data/ref/h2020/other/hi/oa-pilot/h2020-hi-erc-oa-guide\\_en.pdf](http://ec.europa.eu/research/participants/data/ref/h2020/other/hi/oa-pilot/h2020-hi-erc-oa-guide_en.pdf))).

## **REFERENCES**

1. Vos T, Flaxman AD, Naghavi M, Lozano R, Michaud C, Ezzati M et al. Years lived with disability (YLDs) for 1160 sequelae of 289 diseases and injuries 1990-2010: a systematic analysis for the Global Burden of Disease Study 2010. *Lancet* 2012; 380(9859):2163–96.
2. Leucht S, Cipriani A, Spineli L, Mavridis D, Orey D, Richter F et al. Comparative efficacy and tolerability of 15 antipsychotic drugs in schizophrenia: a multiple-treatments meta-analysis. *Lancet* 2013; 382(9896):951–62.
3. National Collaborating Centre for Mental Health. Core interventions in the treatment and management of schizophrenia in adults in primary and secondary care (Clinical Guideline CG82). London; 2009.
4. Buchanan RW, Kreyenbuhl J, Kelly DL, Noel JM, Boggs DL, Fischer BA et al. The 2009 schizophrenia PORT psychopharmacological treatment recommendations and summary statements. *Schizophr Bull* 2010; 36(1):71–93.

- 1  
2  
3 5. Pinquart M, Oslejsek B, Teubert D. Efficacy of systemic therapy on adults with mental disorders: A meta-analysis. *Psychother Res* 2016; 26(2):241–57.
- 4  
5 6. Ruddy R, Milnes D. Art therapy for schizophrenia or schizophrenia-like illnesses. *Cochrane Database Syst Rev* 2005; (4):CD003728.
- 6  
7 7. Jones C, Hacker D, Cormac I, Meaden A, Irving CB. Cognitive behaviour therapy versus other psychosocial treatments for schizophrenia. *Cochrane Database Syst Rev* 2012; (4):CD008712.
- 8  
9 8. Lutgens D, Garipey G, Malla A. Psychological and psychosocial interventions for negative symptoms in psychosis: Systematic review and meta-analysis. *Br J Psychiatry* 2017; 210(5):324–32.
- 10  
11 9. Zimmermann G, Favrod J, Trieu VH, Pomini V. The effect of cognitive behavioral treatment on the positive symptoms of schizophrenia spectrum disorders: A meta-analysis. *Schizophr Res* 2005; 77(1):1–9.
- 12  
13 10. Turner DT, van der Gaag M, Karyotaki E, Cuijpers P. Psychological interventions for psychosis: a meta-analysis of comparative outcome studies. *Am J Psychiatry* 2014; 171(5):523–38.
- 14  
15 11. Naeem F, Asmer MS, Khoury B, Kingdon D, Farooq S. Acceptance and Commitment Therapy for schizophrenia and related disorders (Protocol). *Cochrane Database of Systematic Reviews* 2015; (6).
- 16  
17 12. Gray R, Bressington D, Ivanecka A, Hardy S, Jones M, Schulz M et al. Is adherence therapy an effective adjunct treatment for patients with schizophrenia spectrum disorders? A systematic review and meta-analysis. *BMC Psychiatry* 2016; 16:90.
- 18  
19 13. Marshall M, Lockwood A. Assertive community treatment for people with severe mental disorders. *Cochrane Database Syst Rev* 2000; (2):CD001089.
- 20  
21 14. Dieterich M, Irving CB, Bergman H, Khokhar MA, Park B, Marshall M. Intensive case management for severe mental illness. *Cochrane Database Syst Rev* 2017; 1:CD007906.
- 22  
23 15. Jauhar S, McKenna PJ, Radua J, Fung E, Salvador R, Laws KR. Cognitive-behavioural therapy for the symptoms of schizophrenia: systematic review and meta-analysis with examination of potential bias. *Br J Psychiatry* 2014; 204(1):20–9.
- 24  
25 16. van der Gaag M, Valmaggia LR, Smit F. The effects of individually tailored formulation-based cognitive behavioural therapy in auditory hallucinations and delusions: A meta-analysis. *Schizophr Res* 2014; 156(1):30–7.
- 26  
27 17. Hazell CM, Hayward M, Cavanagh K, Strauss C. A systematic review and meta-analysis of low intensity CBT for psychosis. *Clin Psychol Rev* 2016; 45:183–92.
- 28  
29 18. Kennedy L, Xyrichis A. Cognitive Behavioral Therapy Compared with Non-specialized Therapy for Alleviating the Effect of Auditory Hallucinations in People with Reoccurring Schizophrenia: A Systematic Review and Meta-analysis. *Community Ment Health J* 2017; 53(2):127–33.
- 30  
31 19. Cella M, Preti A, Edwards C, Dow T, Wykes T. Cognitive remediation for negative symptoms of schizophrenia: A network meta-analysis. *Clin Psychol Rev* 2017; 52:43–51.
- 32  
33 20. Ren J, Xia J. Dance therapy for schizophrenia. *Cochrane Database Syst Rev* 2013; (10):CD006868.
- 34  
35 21. Pitschel-Walz G, Leucht S, Bauml J, Kissling W, Engel RR. The effect of family interventions on relapse and rehospitalization in schizophrenia--a meta-analysis. *Schizophr Bull* 2001; 27(1):73–92.
- 36  
37 22. Pharoah F, Mari J, Rathbone J, Wong W. Family intervention for schizophrenia. *Cochrane Database Syst Rev* 2010; (12):CD000088.
- 38  
39 23. Orfanos S, Banks C, Priebe S. Are Group Psychotherapeutic Treatments Effective for Patients with Schizophrenia? A Systematic Review and Meta-Analysis. *Psychother Psychosom* 2015; 84(4):241–9.
- 40  
41  
42  
43  
44  
45  
46  
47  
48  
49  
50  
51  
52  
53  
54  
55  
56  
57  
58  
59  
60

- 1  
2  
3 24. Roder V, Mueller DR, Mueser KT, Brenner HD. Integrated psychological therapy (IPT) for schizophrenia: Is it  
4 effective? *Schizophr Bull* 2006; 32 Suppl 1:S81-93.
- 5 25. Eichner C, Berna F. Acceptance and Efficacy of Metacognitive Training (MCT) on Positive Symptoms and  
6 Delusions in Patients With Schizophrenia: A Meta-analysis Taking Into Account Important Moderators.  
7 *Schizophr Bull* 2016; 42(4):952-62.
- 8 26. Aust J, Bradshaw T. Mindfulness interventions for psychosis: A systematic review of the literature. *J*  
9 *Psychiatr Ment Health Nurs* 2017; 24(1):69-83.
- 10 27. Geretsegger M, Mössler KA, Bieleninik Ł, Chen X-J, Haldal TO, Gold C. Music therapy for people with  
11 schizophrenia and schizophrenia-like disorders. *Cochrane Database Syst Rev* 2017; 5:CD004025.
- 12 28. Malmberg L, Fenton M. Individual psychodynamic psychotherapy and psychoanalysis for schizophrenia and  
13 severe mental illness. *Cochrane Database Syst Rev* 2001; (3):CD001360.
- 14 29. Pekkala E, Merinder L. Psychoeducation for schizophrenia. *Cochrane Database Syst Rev* 2000;  
15 (4):CD002831.
- 16 30. Almerie MQ, Okba Al Marhi M, Jawoosh M, Alsabbagh M, Matar HE, Maayan N et al. Social skills  
17 programmes for schizophrenia. *Cochrane Database Syst Rev* 2015; (6):CD009006.
- 18 31. Buckley LA, Maayan N, Soares-Weiser K, Adams CE. Supportive therapy for schizophrenia. *Cochrane*  
19 *Database Syst Rev* 2015; (4):CD004716.
- 20 32. Hutton B, Salanti G, Caldwell DM, Chaimani A, Schmid CH, Cameron C et al. The PRISMA extension  
21 statement for reporting of systematic reviews incorporating network meta-analyses of health care  
22 interventions: Checklist and explanations. *Ann Intern Med* 2015; 162(11):777-84.
- 23 33. Shamseer L, Moher D, Clarke M, Ghersi D, Liberati A, Petticrew M et al. Preferred reporting items for  
24 systematic review and meta-analysis protocols (PRISMA-P) 2015: Elaboration and explanation. *BMJ* 2015;  
25 349:g7647.
- 26 34. Egger M, Zellweger-Zahner T, Schneider M, Junker C, Lengeler C, Antes G. Language bias in randomised  
27 controlled trials published in English and German. *Lancet* 1997; 350(9074):326-9.
- 28 35. Wu T, Li Y, Liu G, Bian Z, Li J, Zhang J, Xie L, Ni J, editor. Investigation of authenticity of 'claimed' randomized  
29 controlled trials (RCTs) and quality assessment of RCT reports published in China; 2006.
- 30 36. Woodhead M. 80% of China's clinical trial data are fraudulent, investigation finds. *BMJ* 2016; 355:i5396.
- 31 37. Carpenter WT, JR, Buchanan RW. Schizophrenia. *N Engl J Med* 1994; 330(10):681-90.
- 32 38. Adams,C.E., Coutinho,E., Davis,J.M., Duggan,L., Essali,A., Fenton,M., Li,C., Jayaram,M., Leucht,S., Tharyan,P.,  
33 Välimäki,M. Cochrane Schizophrenia Group. The Cochrane Library. Chichester, UK: John Wiley & Sons Ltd;  
34 2011.
- 35 39. Furukawa TA, Noma H, Caldwell DM, Honyashiki M, Shinohara K, Imai H et al. Waiting list may be a nocebo  
36 condition in psychotherapy trials: a contribution from network meta-analysis. *Acta Psychiatr Scand* 2014;  
37 130(3):181-92.
- 38 40. Marshall M, Lockwood A, Bradley C, Adams C, Joy C, Fenton M. Unpublished rating scales: a major source of  
39 bias in randomised controlled trials of treatments for schizophrenia. *Br J Psychiatry* 2000; 176:249-52.
- 40 41. Vaughan B, Goldstein MH, Alikakos M, Cohen LJ, Serby MJ. Frequency of reporting of adverse events in  
41 randomized controlled trials of psychotherapy vs. psychopharmacotherapy. *Compr Psychiatry* 2014; 55(4):849-  
42 55.
- 43 42. Linden M, Schermuly-Haupt M-L. Definition, assessment and rate of psychotherapy side effects. *World*  
44 *Psychiatry* 2014; 13(3):306-9.



- 1  
2  
3 43. Salanti G, Ades AE, Ioannidis JPA. Graphical methods and numerical summaries for presenting results from  
4 multiple-treatment meta-analysis: an overview and tutorial. *J Clin Epidemiol* 2011; 64(2):163–71.
- 5  
6 44. Furukawa TA, Barbui C, Cipriani A, Brambilla P, Watanabe N. Imputing missing standard deviations in meta-  
7 analyses can provide accurate results. *J Clin Epidemiol* 2006; 59(1):7–10.
- 8  
9 45. Higgins JPT, editor. *Cochrane Handbook for Systematic Reviews of Interventions*. Version 5.1.0 [updated  
10 March 2011]; 2011.
- 11  
12 46. Higgins JPT, Altman DG, Sterne JAC (editors), editor. Assessing risk of bias in included studies. In: Higgins  
13 JPT, Churchill R, Chandler J, Cumpston MS (editors), *Cochrane Handbook for Systematic Reviews of*  
14 *Interventions* version 5.2.0 (updated June 2017); Cochrane, 2017. Available from: URL:  
15 <http://training.cochrane.org/handbook>.
- 16  
17 47. Dragioti E, Dimoliatis I, Evangelou E. Disclosure of researcher allegiance in meta-analyses and randomised  
18 controlled trials of psychotherapy: a systematic appraisal. *BMJ Open* 2015; 5(6):e007206.
- 19  
20 48. Lieb K, Osten-Sacken J von der, Stoffers-Winterling J, Reiss N, Barth J. Conflicts of interest and spin in  
21 reviews of psychological therapies: a systematic review. *BMJ Open* 2016; 6(4):e010606.
- 22  
23 49. Munder T, Brusch O, Leonhart R, Gerger H, Barth J. Researcher allegiance in psychotherapy outcome  
24 research: an overview of reviews. *Clin Psychol Rev* 2013; 33(4):501–11.
- 25  
26 50. Furukawa TA, Salanti G, Atkinson LZ, Leucht S, Ruhe HG, Turner EH et al. Comparative efficacy and  
27 acceptability of first-generation and second-generation antidepressants in the acute treatment of major  
28 depression: Protocol for a network meta-analysis. *BMJ Open* 2016; 6(7):e010919.
- 29  
30 51. Rhodes KM, Turner RM, White IR, Jackson D, Spiegelhalter DJ, Higgins JPT. Implementing informative priors  
31 for heterogeneity in meta-analysis using meta-regression and pseudo data. *Stat Med* 2016; 35(29):5495–511.
- 32  
33 52. Rhodes KM, Turner RM, Higgins JPT. Empirical evidence about inconsistency among studies in a pair-wise  
34 meta-analysis. *Res Synth Methods* 2016; 7(4):346–70.
- 35  
36 53. Turner RM, Davey J, Clarke MJ, Thompson SG, Higgins JP. Predicting the extent of heterogeneity in meta-  
37 analysis, using empirical data from the Cochrane Database of Systematic Reviews. *Int J Epidemiol* 2012;  
38 41(3):818–27.
- 39  
40 54. Salanti G. Indirect and mixed-treatment comparison, network, or multiple-treatments meta-analysis: Many  
41 names, many benefits, many concerns for the next generation evidence synthesis tool. *Res Synth Methods*  
42 2012; 3(2):80–97.
- 43  
44 55. Salanti G, Higgins JPT, Ades AE, Ioannidis JPA. Evaluation of networks of randomized trials. *Stat Methods*  
45 *Med Res* 2008; 17(3):279–301.
- 46  
47 56. Salanti G, Del Giovane C, Chaimani A, Caldwell DM, Higgins JPT. Evaluating the quality of evidence from a  
48 network meta-analysis. *PLoS One* 2014; 9(7):e99682.
- 49  
50 57. Dias S, Welton NJ, Caldwell DM, Ades AE. Checking consistency in mixed treatment comparison meta-  
51 analysis. *Stat Med* 2010; 29(7-8):932–44.
- 52  
53 58. Higgins JPT, Jackson D, Barrett JK, Lu G, Ades AE, White IR. Consistency and inconsistency in network meta-  
54 analysis: Concepts and models for multi-arm studies. *Res Synth Methods* 2012; 3(2):98–110.
- 55  
56 59. Chaimani A, Salanti G. Using network meta-analysis to evaluate the existence of small-study effects in a  
57 network of interventions. *Res Synth Methods* 2012; 3(2):161–76.
- 58  
59 60. Veroniki AA, Vasiliadis HS, Higgins JPT, Salanti G. Evaluation of inconsistency in networks of interventions.  
60 *Int J Epidemiol* 2013; 42(1):332–45.

1  
2  
3 **Authors' contributions:** IB and SL designed this study, drafted and critically revised the  
4 protocol. IB will screen search results for inclusion, conduct data extraction and data analysis, and  
5 draft the final manuscript. SL will assist with data extraction and analysis, and revise the final  
6 manuscript. CR and SW will screen search results for inclusion and conduct data extraction. GS  
7 provided substantial methodological advice in planning the study, and will assist with data analysis.  
8 CB and TF contributed with clinical and methodological input in planning the study. All authors  
9 contributed to and have approved the final manuscript.  
10  
11

12  
13 **Collaborators:** Samantha Roberts helped us to conduct the literature searches. Maximilian Huhn,  
14 Johannes Schneider-Thoma, Marc Krause and Costanza Carmi provided help and suggestions.  
15  
16

17 **Funding:** This project has received funding from the European Union's Horizon 2020 Research and  
18 Innovation Programme under the Marie Skłodowska-Curie grant agreement N° 701717. This work  
19 was also supported by the German Research Foundation (DFG) and the Technical University of  
20 Munich within the Open Access Publishing Funding Programme. The funder had no role in developing  
21 the protocol.  
22  
23

24 **Competing interests:** SL in the past 3 years has received honoraria for consulting from Roche,  
25 TEVA, Otsuka, Lundbeck, and LB Pharma; for lectures from Otsuka, Lundbeck, Janssen, ICON, Lilly,  
26 Sanofi Aventis, AOP Orphan, Roche, and Servier; and for a publication from Roche. TAF has received  
27 lecture fees from Eli Lilly, Janssen, Meiji, Mitsubishi-Tanabe, MSD and Pfizer and consultancy fees  
28 from Takeda Science Foundation. He has received royalties from Igaku-Shoin and Nihon Bunka  
29 Kagaku-sha publishers. He has received research support from Mochida and Mitsubishi-Tanabe.  
30  
31  
32  
33  
34  
35  
36  
37  
38  
39  
40  
41  
42  
43  
44  
45  
46  
47  
48  
49  
50  
51  
52  
53  
54  
55  
56  
57  
58  
59  
60

## Search terms for Pubmed

("Schizophrenia"[Mesh] OR "Paranoid Disorders"[Mesh] OR schizo\*[Title/Abstract] OR psychotic\*[Title/Abstract] OR psychosis[Title/Abstract] OR psychoses[Title/Abstract]) AND ("Psychotherapy"[Mesh] or "Behavior Therapy"[Mesh] or "Cognitive Therapy"[Mesh] or "Complementary Therapies"[Mesh] or "Psychoanalysis"[Mesh] or "Counseling"[Mesh] or "Hypnosis"[Mesh] or "Association"[Mesh] or "Association Learning"[Mesh] OR abreaction[Title/Abstract] OR "acceptance[Title/Abstract] AND commitment therapy"[Title/Abstract] OR "acting out"[Title/Abstract] OR adlerian[Title/Abstract] OR "analytical psychotherapy"[Title/Abstract] OR "analytical psychotherapies"[Title/Abstract] OR "anger control"[Title/Abstract] OR "anger management"[Title/Abstract] OR "animal therapy"[Title/Abstract] OR "animal therapies"[Title/Abstract] OR "art therapy"[Title/Abstract] OR "art therapies"[Title/Abstract] OR "assertive training"[Title/Abstract] OR "assertiveness training"[Title/Abstract] OR "attention training technique"[Title/Abstract] OR "autogenic training"[Title/Abstract] OR autosuggestion[Title/Abstract] OR "aversion therapy"[Title/Abstract] OR "aversion therapies"[Title/Abstract] OR "balint group"[Title/Abstract] OR befriending[Title/Abstract] OR "behavior contracting"[Title/Abstract] OR "behavior modification"[Title/Abstract] OR "behavior regulation"[Title/Abstract] OR "behavior therapy"[Title/Abstract] OR "behavior therapies"[Title/Abstract] OR "behaviour contracting"[Title/Abstract] OR "behaviour modification"[Title/Abstract] OR "behaviour regulation"[Title/Abstract] OR "behaviour therapy"[Title/Abstract] OR "behaviour therapies"[Title/Abstract] OR bibliotherapy[Title/Abstract] OR bibliotherapies[Title/Abstract] OR biofeedback[Title/Abstract] OR "body psychotherapy"[Title/Abstract] OR "body psychotherapies"[Title/Abstract] OR "brief psychotherapy"[Title/Abstract] OR "brief psychotherapies"[Title/Abstract] OR "caregiver support"[Title/Abstract] OR cbt[Title/Abstract] OR "client centre"[Title/Abstract] OR "client center"[Title/Abstract] OR "cognitive behavior"[Title/Abstract] OR "cognitive behavioral"[Title/Abstract] OR "cognitive intervention"[Title/Abstract] OR "cognitive interventions"[Title/Abstract] OR "cognitive rehabilitation"[Title/Abstract] OR "cognitive remediation"[Title/Abstract] OR "cognitive technique"[Title/Abstract] OR "cognitive techniques"[Title/Abstract] OR "cognitive therapy"[Title/Abstract] OR "cognitive therapies"[Title/Abstract] OR "cognitive treatment"[Title/Abstract] OR "cognitive treatments"[Title/Abstract] OR "color therapy"[Title/Abstract] OR "color therapies"[Title/Abstract] OR "colour therapy"[Title/Abstract] OR "colour therapies"[Title/Abstract] OR "compassionate mind training"[Title/Abstract] OR "conjoint therapy"[Title/Abstract] OR "conjoint therapies"[Title/Abstract] OR "contingency management"[Title/Abstract] OR "conversational therapy"[Title/Abstract] OR "conversational therapies"[Title/Abstract] OR "conversion therapy"[Title/Abstract] OR "conversion therapies"[Title/Abstract] OR "coping skills"[Title/Abstract] OR counseling[Title/Abstract] OR counselling[Title/Abstract] OR countertransference[Title/Abstract] OR "couples therapy"[Title/Abstract] OR "couples therapies"[Title/Abstract] OR "covert sensitization"[Title/Abstract] OR "covert sensitisation"[Title/Abstract] OR "crisis intervention"[Title/Abstract] OR "dance therapy"[Title/Abstract] OR "dance therapies"[Title/Abstract] OR dialectic[Title/Abstract] OR dialectical[Title/Abstract] OR "dream analysis"[Title/Abstract] OR eclectic[Title/Abstract] OR "emotion focused"[Title/Abstract] OR "emotionally focused"[Title/Abstract] OR "emotional freedom technique"[Title/Abstract] OR "encounter group therapy"[Title/Abstract] OR "encounter group therapies"[Title/Abstract] OR "existential therapy"[Title/Abstract] OR "existential therapies"[Title/Abstract] OR "experiential

1  
2  
3 psychotherapy"[Title/Abstract] OR "experiential psychotherapies"[Title/Abstract] OR "exposure  
4 therapy"[Title/Abstract] OR "exposure therapies"[Title/Abstract] OR "expressive  
5 psychotherapy"[Title/Abstract] OR "expressive psychotherapies"[Title/Abstract] OR "eye movement  
6 desensitization"[Title/Abstract] OR "eye movement desensitisation"[Title/Abstract] OR "family  
7 intervention"[Title/Abstract] OR "family interventions"[Title/Abstract] OR "family  
8 therapy"[Title/Abstract] OR "family therapies"[Title/Abstract] OR "feminist therapy"[Title/Abstract]  
9 OR "feminist therapies"[Title/Abstract] OR "free association"[Title/Abstract] OR  
10 freudian"[Title/Abstract] OR "geriatric psychotherapy"[Title/Abstract] OR "geriatric  
11 psychotherapies"[Title/Abstract] OR "gestalt therapy"[Title/Abstract] OR "gestalt  
12 therapies"[Title/Abstract] OR griefwork"[Title/Abstract] OR "group intervention"[Title/Abstract] OR  
13 "group interventions"[Title/Abstract] OR "group psychotherapy"[Title/Abstract] OR "group  
14 psychotherapies"[Title/Abstract] OR "group therapy"[Title/Abstract] OR "group  
15 therapies"[Title/Abstract] OR "guided imagery"[Title/Abstract] OR "holistic  
16 psychotherapy"[Title/Abstract] OR "holistic psychotherapies"[Title/Abstract] OR "humanistic  
17 psychotherapy"[Title/Abstract] OR "humanistic psychotherapies"[Title/Abstract] OR  
18 hypnosis"[Title/Abstract] OR hypnotherapy"[Title/Abstract] OR hypnotherapies"[Title/Abstract] OR  
19 hypnotizability"[Title/Abstract] OR hypnotisability"[Title/Abstract] OR imagery"[Title/Abstract] OR  
20 "implosive therapy"[Title/Abstract] OR "implosive therapies"[Title/Abstract] OR "individual  
21 psychotherapy"[Title/Abstract] OR "individual psychotherapies"[Title/Abstract] OR "insight  
22 therapy"[Title/Abstract] OR "insight therapies"[Title/Abstract] OR "integrated psychological  
23 therapy"[Title/Abstract] OR "integrative psychotherapy"[Title/Abstract] OR "integrative  
24 psychotherapies"[Title/Abstract] OR "integrative therapy"[Title/Abstract] OR "integrative  
25 therapies"[Title/Abstract] OR interpersonal"[Title/Abstract] OR jungian"[Title/Abstract] OR  
26 kleinian"[Title/Abstract] OR logotherapy"[Title/Abstract] OR logotherapies"[Title/Abstract] OR  
27 "marathon group therapy"[Title/Abstract] OR "marathon group therapies"[Title/Abstract] OR  
28 "marital therapy"[Title/Abstract] OR "marital therapies"[Title/Abstract] OR meditation"[Title/Abstract]  
29 OR "mental healing"[Title/Abstract] OR "metacognitive therapy"[Title/Abstract] OR "metacognitive  
30 therapies"[Title/Abstract] OR "metacognitive training"[Title/Abstract] OR "milieu  
31 therapy"[Title/Abstract] OR "milieu therapies"[Title/Abstract] OR mindfulness"[Title/Abstract] OR  
32 "morita therapy"[Title/Abstract] OR "morita therapies"[Title/Abstract] OR multimodal"[Title/Abstract]  
33 OR "music therapy"[Title/Abstract] OR "music therapies"[Title/Abstract] OR "narrative  
34 therapy"[Title/Abstract] OR "narrative therapies"[Title/Abstract] OR "nondirective  
35 therapy"[Title/Abstract] OR "nondirective therapies"[Title/Abstract] OR "object  
36 relations"[Title/Abstract] OR "person centred therapy"[Title/Abstract] OR "person centred  
37 therapies"[Title/Abstract] OR "person centered therapy"[Title/Abstract] OR "person centered  
38 therapies"[Title/Abstract] OR "personal construct therapy"[Title/Abstract] OR "personal construct  
39 therapies"[Title/Abstract] OR "persuasion therapy"[Title/Abstract] OR "persuasion  
40 therapies"[Title/Abstract] OR "pet therapy"[Title/Abstract] OR "pet therapies"[Title/Abstract] OR  
41 "play therapy"[Title/Abstract] OR "play therapies"[Title/Abstract] OR "primal therapy"[Title/Abstract]  
42 OR "primal therapies"[Title/Abstract] OR "problem solving"[Title/Abstract] OR  
43 psychoanalyse"[Title/Abstract] OR psychoanalysed"[Title/Abstract] OR psychoanalysis"[Title/Abstract]  
44 OR psychoanalytic"[Title/Abstract] OR psychodrama"[Title/Abstract] OR psychodynamic"[Title/Abstract]  
45 OR psychoeducate"[Title/Abstract] OR psychoeducation"[Title/Abstract] OR  
46 psychoeducating"[Title/Abstract] OR psychologic"[Title/Abstract] OR psychological"[Title/Abstract] OR  
47 psychologically"[Title/Abstract] OR "psychological therapy"[Title/Abstract] OR "psychological  
48 therapies"[Title/Abstract] OR "psychosocial treatment"[Title/Abstract] OR "psychosocial  
49  
50  
51  
52  
53  
54  
55  
56  
57  
58  
59  
60

1  
2  
3 treatments"[Title/Abstract] OR psychotherapy[Title/Abstract] OR psychotherapies[Title/Abstract] OR  
4 "psychotherapeutic counsel"[Title/Abstract] OR "psychotherapeutic counseling"[Title/Abstract] OR  
5 "psychotherapeutic counselling"[Title/Abstract] OR "psychotherapeutic processes"[Title/Abstract] OR  
6 "psychotherapeutic training"[Title/Abstract] OR "psychotherapeutic treatment"[Title/Abstract] OR  
7 "psychotherapeutic treatments"[Title/Abstract] OR "rational emotive"[Title/Abstract] OR "reality  
8 therapy"[Title/Abstract] OR "reality therapies"[Title/Abstract] OR "reciprocal  
9 inhibition"[Title/Abstract] OR rehabilitation[Title/Abstract] OR rehabilitating[Title/Abstract] OR  
10 "relationship therapy"[Title/Abstract] OR "relationship therapies"[Title/Abstract] OR  
11 relaxation[Title/Abstract] OR "reminiscence therapy"[Title/Abstract] OR "reminiscence  
12 therapies"[Title/Abstract] OR rogerian[Title/Abstract] OR "role play"[Title/Abstract] OR "role  
13 plays"[Title/Abstract] OR "role playing"[Title/Abstract] OR "self analysis"[Title/Abstract] OR "self  
14 analysing"[Title/Abstract] OR "self esteem"[Title/Abstract] OR "sensitivity training"[Title/Abstract] OR  
15 "sex therapy"[Title/Abstract] OR "sex therapies"[Title/Abstract] OR "sleep phase  
16 chronotherapy"[Title/Abstract] OR "sleep phase chronotherapies"[Title/Abstract] OR "social skills  
17 education"[Title/Abstract] OR "social skills training"[Title/Abstract] OR "socioenvironmental  
18 therapy"[Title/Abstract] OR "socioenvironmental therapies"[Title/Abstract] OR  
19 sociotherapy[Title/Abstract] OR sociotherapies[Title/Abstract] OR "solution focused"[Title/Abstract]  
20 OR "stress management"[Title/Abstract] OR "support group"[Title/Abstract] OR "support  
21 groups"[Title/Abstract] OR "supportive therapy"[Title/Abstract] OR "supportive  
22 therapies"[Title/Abstract] OR "systematic desensitization"[Title/Abstract] OR "systematic  
23 desensitisation"[Title/Abstract] OR "systemic therapy"[Title/Abstract] OR "systemic  
24 therapies"[Title/Abstract] OR "therapeutic community"[Title/Abstract] OR "therapeutic  
25 communities"[Title/Abstract] OR "transactional analysis"[Title/Abstract] OR  
26 transference[Title/Abstract] OR transtheoretical[Title/Abstract] OR "validation  
27 therapy"[Title/Abstract] OR "validation therapies"[Title/Abstract]) AND (((randomized controlled  
28 trial[pt]) OR (controlled clinical trial[pt]) OR (randomized[tiab]) OR (placebo[tiab]) OR (drug  
29 therapy[sh]) OR (randomly[tiab]) OR (trial[tiab]) OR (groups[tiab])) NOT (animals[mh]) NOT  
30 humans[mh]))

**PRISMA-P (Preferred Reporting Items for Systematic review and Meta-Analysis Protocols) 2015 checklist: recommended items to address in a systematic review protocol\***

| Section and topic                 | Item No | Checklist item                                                                                                                                                                                                                | Reported on page   |
|-----------------------------------|---------|-------------------------------------------------------------------------------------------------------------------------------------------------------------------------------------------------------------------------------|--------------------|
| <b>ADMINISTRATIVE INFORMATION</b> |         |                                                                                                                                                                                                                               |                    |
| Title:                            |         |                                                                                                                                                                                                                               |                    |
| Identification                    | 1a      | Identify the report as a protocol of a systematic review                                                                                                                                                                      | 1 (title)          |
| Update                            | 1b      | If the protocol is for an update of a previous systematic review, identify as such                                                                                                                                            | -                  |
| Registration                      | 2       | If registered, provide the name of the registry (such as PROSPERO) and registration number                                                                                                                                    | 2                  |
| Authors:                          |         |                                                                                                                                                                                                                               |                    |
| Contact                           | 3a      | Provide name, institutional affiliation, e-mail address of all protocol authors; provide physical mailing address of corresponding author                                                                                     | 1                  |
| Contributions                     | 3b      | Describe contributions of protocol authors and identify the guarantor of the review                                                                                                                                           | 16                 |
| Amendments                        | 4       | If the protocol represents an amendment of a previously completed or published protocol, identify as such and list changes; otherwise, state plan for documenting important protocol amendments                               | 5                  |
| Support:                          |         |                                                                                                                                                                                                                               |                    |
| Sources                           | 5a      | Indicate sources of financial or other support for the review                                                                                                                                                                 | 16-17              |
| Sponsor                           | 5b      | Provide name for the review funder and/or sponsor                                                                                                                                                                             | 16-17              |
| Role of sponsor or funder         | 5c      | Describe roles of funder(s), sponsor(s), and/or institution(s), if any, in developing the protocol                                                                                                                            | 16-17              |
| <b>INTRODUCTION</b>               |         |                                                                                                                                                                                                                               |                    |
| Rationale                         | 6       | Describe the rationale for the review in the context of what is already known                                                                                                                                                 | 3                  |
| Objectives                        | 7       | Provide an explicit statement of the question(s) the review will address with reference to participants, interventions, comparators, and outcomes (PICO)                                                                      | 5                  |
| <b>METHODS</b>                    |         |                                                                                                                                                                                                                               |                    |
| Eligibility criteria              | 8       | Specify the study characteristics (such as PICO, study design, setting, time frame) and report characteristics (such as years considered, language, publication status) to be used as criteria for eligibility for the review | 5-8                |
| Information sources               | 9       | Describe all intended information sources (such as electronic databases, contact with study authors, trial registers or other grey literature sources) with planned dates of coverage                                         | 8                  |
| Search strategy                   | 10      | Present draft of search strategy to be used for at least one electronic database, including planned limits, such that it could be repeated                                                                                    | Supplementary file |
| Study records:                    |         |                                                                                                                                                                                                                               |                    |

|                                    |     |                                                                                                                                                                                                                                                  |           |
|------------------------------------|-----|--------------------------------------------------------------------------------------------------------------------------------------------------------------------------------------------------------------------------------------------------|-----------|
| Data management                    | 11a | Describe the mechanism(s) that will be used to manage records and data throughout the review                                                                                                                                                     | 8-9       |
| Selection process                  | 11b | State the process that will be used for selecting studies (such as two independent reviewers) through each phase of the review (that is, screening, eligibility and inclusion in meta-analysis)                                                  | 8-9       |
| Data collection process            | 11c | Describe planned method of extracting data from reports (such as piloting forms, done independently, in duplicate), any processes for obtaining and confirming data from investigators                                                           | 9         |
| Data items                         | 12  | List and define all variables for which data will be sought (such as PICO items, funding sources), any pre-planned data assumptions and simplifications                                                                                          | 9         |
| Outcomes and prioritization        | 13  | List and define all outcomes for which data will be sought, including prioritization of main and additional outcomes, with rationale                                                                                                             | 7-8       |
| Risk of bias in individual studies | 14  | Describe anticipated methods for assessing risk of bias of individual studies, including whether this will be done at the outcome or study level, or both; state how this information will be used in data synthesis                             | 10        |
| Data synthesis                     | 15a | Describe criteria under which study data will be quantitatively synthesised                                                                                                                                                                      | 9         |
|                                    | 15b | If data are appropriate for quantitative synthesis, describe planned summary measures, methods of handling data and methods of combining data from studies, including any planned exploration of consistency (such as $I^2$ , Kendall's $\tau$ ) | 9, 11, 12 |
|                                    | 15c | Describe any proposed additional analyses (such as sensitivity or subgroup analyses, meta-regression)                                                                                                                                            | 12        |
|                                    | 15d | If quantitative synthesis is not appropriate, describe the type of summary planned                                                                                                                                                               | -         |
| Meta-bias(es)                      | 16  | Specify any planned assessment of meta-bias(es) (such as publication bias across studies, selective reporting within studies)                                                                                                                    | 12, 13    |
| Confidence in cumulative evidence  | 17  | Describe how the strength of the body of evidence will be assessed (such as GRADE)                                                                                                                                                               | 13        |

**\* It is strongly recommended that this checklist be read in conjunction with the PRISMA-P Explanation and Elaboration (cite when available) for important clarification on the items. Amendments to a review protocol should be tracked and dated. The copyright for PRISMA-P (including checklist) is held by the PRISMA-P Group and is distributed under a Creative Commons Attribution Licence 4.0.**

*From: Shamseer L, Moher D, Clarke M, Ghersi D, Liberati A, Petticrew M, Shekelle P, Stewart L, PRISMA-P Group. Preferred reporting items for systematic review and meta-analysis protocols (PRISMA-P) 2015: elaboration and explanation. BMJ. 2015 Jan 2;349(jan02 1):g7647.*

# BMJ Open

## Psychological interventions for positive symptoms in schizophrenia: protocol for a network meta-analysis of randomized controlled trials

|                                 |                                                                                                                                                                                                                                                                                                                                                                                                                                                                                                                                                                                                                                                                                                                                                                                                                                                                                                                                                                                          |
|---------------------------------|------------------------------------------------------------------------------------------------------------------------------------------------------------------------------------------------------------------------------------------------------------------------------------------------------------------------------------------------------------------------------------------------------------------------------------------------------------------------------------------------------------------------------------------------------------------------------------------------------------------------------------------------------------------------------------------------------------------------------------------------------------------------------------------------------------------------------------------------------------------------------------------------------------------------------------------------------------------------------------------|
| Journal:                        | <i>BMJ Open</i>                                                                                                                                                                                                                                                                                                                                                                                                                                                                                                                                                                                                                                                                                                                                                                                                                                                                                                                                                                          |
| Manuscript ID                   | bmjopen-2017-019280.R2                                                                                                                                                                                                                                                                                                                                                                                                                                                                                                                                                                                                                                                                                                                                                                                                                                                                                                                                                                   |
| Article Type:                   | Protocol                                                                                                                                                                                                                                                                                                                                                                                                                                                                                                                                                                                                                                                                                                                                                                                                                                                                                                                                                                                 |
| Date Submitted by the Author:   | 28-Dec-2017                                                                                                                                                                                                                                                                                                                                                                                                                                                                                                                                                                                                                                                                                                                                                                                                                                                                                                                                                                              |
| Complete List of Authors:       | Bighelli, Irene; Klinikum rechts der Isar der Technischen Universitat Munchen, Department of Psychiatry and Psychotherapy<br>Salanti, Georgia; University of Bern, Institute of Social and Preventive Medicine (ISPM)<br>Reitmeir, Cornelia; Klinikum rechts der Isar der Technischen Universitat Munchen, Department of Psychiatry and Psychotherapy<br>Wallis, Sofia; Klinikum rechts der Isar der Technischen Universitat Munchen, Department of Psychiatry and Psychotherapy<br>Barbui, Corrado; University of Verona, WHO Collaborating Centre for Research and Training in Mental Health and Service Evaluation, Department of Neuroscience, Biomedicine and Movement Sciences, Section of Psychiatry<br>Furukawa, Toshi; Kyoto University, Department of Health Promotion and Human Behavior, Graduate School of Medicine and School of Public Health<br>Leucht, Stefan; Klinikum rechts der Isar der Technischen Universitat Munchen, Department of Psychiatry and Psychotherapy |
| <b>Primary Subject Heading</b>: | Mental health                                                                                                                                                                                                                                                                                                                                                                                                                                                                                                                                                                                                                                                                                                                                                                                                                                                                                                                                                                            |
| Secondary Subject Heading:      | Mental health                                                                                                                                                                                                                                                                                                                                                                                                                                                                                                                                                                                                                                                                                                                                                                                                                                                                                                                                                                            |
| Keywords:                       | Schizophrenia & psychotic disorders < PSYCHIATRY, Adult psychiatry < PSYCHIATRY, Psychological interventions, Network Meta-Analysis, Psychotherapy                                                                                                                                                                                                                                                                                                                                                                                                                                                                                                                                                                                                                                                                                                                                                                                                                                       |
|                                 |                                                                                                                                                                                                                                                                                                                                                                                                                                                                                                                                                                                                                                                                                                                                                                                                                                                                                                                                                                                          |

SCHOLARONE™  
Manuscripts



# Psychological interventions for positive symptoms in schizophrenia: protocol for a network meta-analysis of randomized controlled trials

Irene Bighelli<sup>1\*</sup>, Georgia Salanti<sup>2</sup>, Cornelia Reitmeir<sup>1</sup>, Sofia Wallis<sup>1</sup>, Corrado Barbui<sup>3</sup>, Toshi A. Furukawa<sup>4</sup>, Stefan Leucht<sup>1</sup>

<sup>1</sup> Department of Psychiatry and Psychotherapy, Klinikum rechts der Isar, Technical University of Munich, Germany

<sup>2</sup> Institute of Social and Preventive Medicine (ISPM), University of Bern, Switzerland

<sup>3</sup> WHO Collaborating Centre for Research and Training in Mental Health and Service Evaluation, Department of Neuroscience, Biomedicine and Movement Sciences, Section of Psychiatry, University of Verona, Italy

<sup>4</sup> Department of Health Promotion and Human Behavior, Kyoto University Graduate School of Medicine / School of Public Health, Japan

\*Corresponding author

Department of Psychiatry and Psychotherapy  
Klinikum rechts der Isar, Technische Universität München  
Ismaningerstr. 22, 81675 München, Germany  
E-mail: [irene.bighelli@tum.de](mailto:irene.bighelli@tum.de)

[GS: georgia.salanti@ispm.unibe.ch](mailto:gsalanti@ispm.unibe.ch)

[CR: cornelia.reitmeir@tum.de](mailto:cornelia.reitmeir@tum.de)

[SW: sofia.wallis@tum.de](mailto:sofia.wallis@tum.de)

[CB: corrado.barbui@univr.it](mailto:corrado.barbui@univr.it)

[TAF: furukawa@kuhp.kyoto-u.ac.jp](mailto:furukawa@kuhp.kyoto-u.ac.jp)

[SL: stefan.leucht@tum.de](mailto:stefan.leucht@tum.de)

## ABSTRACT

### Introduction

There is rising awareness that we need multi-disciplinary approaches integrating psychological treatments for schizophrenia, but a comprehensive evidence base on their relative efficacy is lacking. We will conduct a network meta-analysis (NMA), integrating direct and indirect comparisons from randomised controlled trials (RCTs) to rank psychological treatments for schizophrenia according to their efficacy, acceptability and tolerability.

### Methods and analysis

We will include all RCTs comparing a psychological treatment aimed at positive symptoms of schizophrenia with another psychological intervention or with a no treatment condition (waiting list, treatment as usual). We will include studies on adult patients with schizophrenia, excluding specific subpopulations (e.g. first episode patients, or patients with psychiatric comorbidities). Primary outcome will be the change in positive symptoms on a published rating scale. Secondary outcomes will be acceptability (dropout), change in overall and negative symptoms of schizophrenia, response, relapse, adherence, depression, quality of life, functioning and adverse events. Published and unpublished studies will be sought through database searches, trial registries and websites. Study selection and data extraction will be conducted by at least two independent reviewers. We will conduct random-effects NMA to synthesize all evidence for each outcome and obtain a comprehensive ranking of all treatments. NMA will be conducted in Stata and R within a frequentist framework. The risk of bias in studies will be evaluated using the Cochrane Risk of Bias tool and the credibility of the evidence will be evaluated using an adaptation of the GRADE framework to NMA, recommended by the Cochrane guidance. Subgroup and sensitivity analyses will be conducted to assess the robustness of the findings.

### Ethics and dissemination

No ethical issues are foreseen. Results from this study will be published in peer-reviewed journals and presented at relevant conferences.

**PROSPERO registration number:** CRD42017067795

### STRENGTHS AND LIMITATIONS OF THIS STUDY

- We will conduct a random-effects network meta-analysis to synthesize all available published or unpublished randomized controlled trials for each pre-specified outcome, and obtain a comprehensive ranking of all treatments.
- This will be the first network meta-analysis on psychological treatments for schizophrenia; the findings from this study have the potential to inform and influence clinical decision-making and guideline development.
- The risk of heterogeneity and inconsistency is high, given the different psychological interventions that will be included: however, we try to control variability by carefully framing the inclusion criteria about population and interventions, and we will evaluate consistency employing local as well as global methods.

- The limitations of primary studies will be addressed with the Cochrane risk of bias tool and the quality of evidence for network estimates will be assessed with an appropriate adaptation of the GRADE framework; these approaches are considered the gold standard for critical appraisal of evidence quality.

## INTRODUCTION

Schizophrenia is a debilitating, and often life-long disorder that ranks among the top 20 causes of disability according to the World Health Report (1). Although pharmacological interventions have been the mainstay of treatment for schizophrenia, antipsychotics have a number of limitations (limited response, high incidence of disabling side effects, poor adherence to treatment) (2) and are problematic in many situations (such as medical comorbidities, tolerability problems and pregnancy). Besides, there has been growing recognition of the importance of psychological processes in psychosis, both as contributors to onset and persistence, and in terms of the negative psychological impact of a diagnosis of schizophrenia on the individual's well-being, psychosocial functioning and life opportunities. Psychological interventions for psychosis and schizophrenia have been developed to address these aspects, and, in accordance with guidelines from the National Institute for Health and Care Excellence in the United Kingdom (3) and the Schizophrenia Patient Outcomes Research Team in the United States (4), psychological treatments are widely regarded as a necessary intervention for schizophrenia.

A broad range of interventions that can be defined as "psychological" have been studied in the treatment of schizophrenia. These interventions can be provided at different stages of the illness and address different aspects, like social and cognitive functioning, adherence to medication and symptoms of schizophrenia. Table 1 presents the panorama of existing systematic reviews of randomized controlled trials that have been conducted on the topic. These reviews have mainly included studies comparing the intervention under examination with so called no treatment conditions (waiting-list, treatment as usual (TAU)) (5, 6). Other reviews included also active comparisons with other psychological treatments (7–9). An attempt to provide information on active comparisons was made by Turner and colleagues, who performed separate meta-analysis when there were at least five eligible randomized controlled trials comparing one intervention to another psychological intervention (10). However, all the available reviews applied pairwise meta-analysis as a method, being able to pool results only when a comparison of two treatments was considered in existing studies. The comparative efficacy and tolerability of the existing interventions has not been checked yet; as a result, it is still currently unclear which are the most efficacious, the most acceptable and the best tolerable psychological treatments for schizophrenia.

To overcome this gap in the current knowledge, a network meta-analysis would be necessary to consider both direct and indirect comparisons, and produce hierarchies of the effects of the various psychological treatments in the various efficacy and tolerability outcomes. Such hierarchies are essential for guidelines, which should ideally be able to indicate which treatment is likely to be the best, the second best and so on for a given outcome. Only the method of network meta-analysis can provide such hierarchies by combining all the randomised evidence. Our aim is to produce such a network meta-analysis of all psychological interventions for schizophrenia in multiple outcomes. We focus here on the interventions primarily aimed at treating positive symptoms in the acute phase of the illness.

| Intervention                                                                                                                        | Existing reviews                               | RCT* | Comparator                                                                                                                                                                                                                                                                                                             |
|-------------------------------------------------------------------------------------------------------------------------------------|------------------------------------------------|------|------------------------------------------------------------------------------------------------------------------------------------------------------------------------------------------------------------------------------------------------------------------------------------------------------------------------|
| <b>Acceptance and commitment therapy</b>                                                                                            | Ongoing Cochrane review (11)                   | -    | TAU, pharmacological intervention, another psychosocial intervention                                                                                                                                                                                                                                                   |
| <b>Adherence interventions</b>                                                                                                      | Gray 2016 (12)                                 | 6    | TAU, didactic health education                                                                                                                                                                                                                                                                                         |
| <b>Active comparisons (Befriending, CBT, Cognitive remediation, Psychoeducation, Social skills training, Supportive counseling)</b> | Turner 2014 (10)                               | 48   | Befriending, CBT, Cognitive remediation, Psychoeducation, Social skills training, Supportive counseling, Family intervention, Art therapy, Body psychotherapy, Occupational therapy, Problem-solving therapy                                                                                                           |
| <b>Art therapy</b>                                                                                                                  | Ruddy 2005 (6)                                 | 2    | Standard care                                                                                                                                                                                                                                                                                                          |
| <b>Assertive community treatment</b>                                                                                                | Marshall 1998 (13)                             | 20** | TAU, hospital-based rehabilitation, case management                                                                                                                                                                                                                                                                    |
| <b>Befriending</b>                                                                                                                  | -                                              |      |                                                                                                                                                                                                                                                                                                                        |
| <b>Bibliotherapy</b>                                                                                                                | -                                              |      |                                                                                                                                                                                                                                                                                                                        |
| <b>Body oriented psychological therapy</b>                                                                                          | -                                              |      |                                                                                                                                                                                                                                                                                                                        |
| <b>Case management</b>                                                                                                              | Dieterich 2017 (14)                            | 40** | Assertive Community Treatment, Assertive Outreach model, Case Management model, standard community care                                                                                                                                                                                                                |
|                                                                                                                                     | Zimmermann 2005 (positive symptoms) (9)        | 15   | Waiting-list, TAU or another therapeutic treatment                                                                                                                                                                                                                                                                     |
|                                                                                                                                     | Jones 2012 (7)                                 | 20   | Active (Psychoeducation, Family Intervention, Supportive Psychotherapy, Supportive Counselling, Cognitive Remediation) and nonactive control treatments (Recreation and support, social activities, befriending, non-specific counselling)                                                                             |
| <b>Cognitive behavioural therapy</b>                                                                                                | Jauhar 2013 (15)                               | 52   | Waiting list, TAU or an intervention designed to control for the non-specific effects of psychotherapy (recreation and support, group support, befriending, supportive counselling/therapy, social activity therapy and goal-focused supportive contact) or active treatments (cognitive remediation, psychoeducation) |
|                                                                                                                                     | Van der Gaag 2014 (individually tailored) (16) | 18   | Any control condition was accepted                                                                                                                                                                                                                                                                                     |
|                                                                                                                                     | Hazell 2016 (low intensity) (17)               | 8    | TAU, supportive psychotherapy                                                                                                                                                                                                                                                                                          |
|                                                                                                                                     | Kennedy 2016 (auditory hallucinations) (18)    | 2    | Non-specialized therapy (focused on supportive interactions and social integration)                                                                                                                                                                                                                                    |
| <b>Cognitive remediation</b>                                                                                                        | Cella 2016 (19)                                | 45   | TAU, active control (e.g. computer games) another active treatment (e.g. CBT)                                                                                                                                                                                                                                          |
| <b>Dance therapy</b>                                                                                                                | Ren 2013 (20)                                  | 1    | Standard care plus supportive counselling                                                                                                                                                                                                                                                                              |
| <b>Family interventions</b>                                                                                                         | Pitschel-Walz 2001 (21)                        | 25   | TAU, patient intervention, other family interventions                                                                                                                                                                                                                                                                  |
|                                                                                                                                     | Pharoah 2006 (22)                              | 25   | TAU, discussion groups, psychoeducation, supportive psychotherapy, psychosocial support                                                                                                                                                                                                                                |
| <b>Group psychotherapeutic treatments</b>                                                                                           | Orfanos 2015 (23)                              | 34   | TAU, other groups (active discussion group, support group, counselling group, occupational                                                                                                                                                                                                                             |

|                                                                                        |                       |      |                                                                                                                                                                                                                   |
|----------------------------------------------------------------------------------------|-----------------------|------|-------------------------------------------------------------------------------------------------------------------------------------------------------------------------------------------------------------------|
|                                                                                        |                       |      | therapy group or problem-solving discussion group)                                                                                                                                                                |
| <b>Integrated psychological Therapy (IPT)</b>                                          | Roder 2006 (24)       | 16   | TAU, placebo-attention condition, other active treatments                                                                                                                                                         |
| <b>Psychological and psychosocial interventions for negative symptoms in psychosis</b> | Lutgens 2017 (8)      | 95   | TAU, active comparator (including psychoeducation, supportive therapy, cognitive remediation)                                                                                                                     |
| <b>Metacognitive training</b>                                                          | Eichner 2016 (25)     | 12   | TAU, Wait list control, Supportive Therapy, Newspaper discussion group, CogPack (=Cognitive remediation)                                                                                                          |
| <b>Mindfulness</b>                                                                     | Aust 2017 (26)        | 11** | Active control intervention (e.g. Befriending, Progressive Muscle Relaxation), TAU                                                                                                                                |
| <b>Music therapy</b>                                                                   | Geretsegger 2017 (27) | 18   | Placebo defined as an alternative therapy designed to control for effects of the therapist's attention; TAU or no treatment                                                                                       |
| <b>Psychodynamic therapy</b>                                                           | Malmberg 2012 (28)    | 4    | Reality-adaptive, supportive psychotherapy, Hospital comparison, Ataraxic drugs, electro convulsive therapy, Milieu therapy, individual vs. group                                                                 |
| <b>Psychoeducation</b>                                                                 | Pekkala 2006 (29)     | 10   | TAU, supportive psychotherapy, behavioral intervention, leisure-time group                                                                                                                                        |
| <b>Social skills training</b>                                                          | Almerie 2015 (30)     | 13   | TAU, structured activities, discussion group, interaction group, no treatment control                                                                                                                             |
| <b>Supportive therapy</b>                                                              | Buckley 2015 (31)     | 24   | Standard care, any other treatment (biological, psychological or social) such as medication, problem-solving therapy, psychoeducation, social skills training, CBT, family therapy or psychodynamic psychotherapy |
| <b>Systemic therapy</b>                                                                | Pinquart 2016 (5)     | 7    | No treatment                                                                                                                                                                                                      |

**Table 1.** Existing reviews about psychological treatments for schizophrenia.

RCT: randomized controlled trial; TAU: treatment as usual.

\*number of RCTs on schizophrenic patients; \*\*RCTs about patients with severe mental illness including schizophrenia

## Objectives

To estimate relative treatment effects and obtain a hierarchy for the psychological treatments in patients with schizophrenia, in terms of:

1. Efficacy on positive symptoms
2. Acceptability
3. Other efficacy measures, such as overall symptoms, negative symptoms, response, relapse, adherence, depression, quality of life, functioning
4. Tolerability.

## METHODS AND ANALYSIS

### Criteria for considering studies for this review

Methods for this systematic review have been developed according to the Preferred Reporting Items for Systematic review and Meta-Analysis Protocols (PRISMA-P) checklist, and the PRISMA extension statement for reporting of systematic reviews incorporating network meta-analyses of healthcare interventions (32, 33). This systematic review and NMA is registered in the PROSPERO database

(registration number: CRD42017067795); the record in PROSPERO will be updated with any amendment made to the protocol.

### *Types of studies*

We will include all randomised trials (RCTs) in which participants with schizophrenia received a psychological intervention as defined below (see *Types of interventions*). Studies whose sequence generation was at high risk of bias (e.g. randomization by the date of birth or day of the week) will be excluded. We will accept open and blinded RCTs; this choice is particularly relevant in trials on psychological interventions, in which in best case only the assessor of outcome can be blind, but not the therapist. Open RCTs will be excluded in a sensitivity analysis. We will include both trials in which psychological interventions were compared with a control condition and trials in which they were compared with another intervention. There will be no language restriction in order to avoid the problem of 'language bias' (34). In case we retrieve references in languages in which we are not fluent, study authors will be contacted to check inclusion criteria and eventually ask for study data. As an exception, we will not search Chinese databases, since serious concerns have been raised on the trustworthiness of Chinese trials found in these databases (35, 36). Chinese studies found in Western databases will be considered for inclusion. In the case of cross-over studies we will use only the first cross-over phase in order to avoid the problem of carry-over effects which are very likely in schizophrenia and with psychological treatments. We will exclude cluster randomized trials.

### *Types of participants*

Our aim is to collect information on the efficacy of psychological treatments on patients with positive symptoms. In order to select this population, we operationalized the inclusion criteria as follows. We will include adults, however defined by study authors, with a diagnosis of schizophrenia or related disorders (such as schizophreniform, or schizoaffective disorders); there is no clear evidence that the latter schizophrenia-like psychoses are caused by fundamentally different disease processes or require different treatment approaches (37). We will include trials irrespective of the diagnostic criteria used. Here we will follow the strategy of the Cochrane Schizophrenia Group (38) to include not only studies that used specific diagnostic criteria such as ICD-10 or DSM-V, because these criteria are not meticulously used in clinical routine either. This decision should increase generalizability and representativeness.

Studies including participants with other diagnoses part of the psychosis spectrum will be included only if participants with a diagnosis of schizophrenia, schizophreniform or schizoaffective disorders were more than 80% of the participants considered. We will include studies recruiting patients with positive symptoms, either delusions, hallucinations or both, or in the phase of acute exacerbation of positive symptoms, however defined by inclusion criteria of the trial.

We will exclude studies focused on specific subpopulations of patients, such as (1) studies recruiting patients in which negative symptoms are predominant, according to authors' definition, (2) studies on patients with comorbid psychiatric disorders including substance abuse, (3) studies recruiting patients with concomitant medical illnesses, (4) trials enrolling stable patients (relapse prevention studies), (5) studies on first episode patients, (6) trials on patients who show prodromal signs of psychosis (also defined as "at risk for psychosis"). Among other reasons, we exclude first episode patients because they were found to have significantly higher response rates to treatments compared to chronic patients (39, 40).

### *Types of interventions*

Any psychological intervention that occurs through interaction between therapist and patient, either face-to-face individually or in group, with the primary aim to reduce positive symptoms. Interventions with an explicit primary aim different from positive symptoms (e.g. functioning, cognition, adherence to medication, knowledge of the illness) will be excluded. The identified treatments will be classified after identification of eligible studies. Psychological treatments will be compared to each other and to any non-pharmacological control condition considered in the included studies. Comparators will include the so called “treatment as usual”, waiting list and inactive treatments. The effect of “non-active” comparators will be analysed in a sensitivity analysis (41). Patients also receiving treatment as usual, including pharmacological interventions, will be included. If psychological treatments that we do not include among the interventions (e.g. psychoeducation, supportive therapy) are used as control condition in the studies, they will be included as nodes in order to strengthen the network, but will not be part of our decision set.

### *Outcome measures*

Outcomes will be measured at study endpoint, as defined in each study.

### **Primary outcome**

Change in positive symptoms of schizophrenia, examined accordingly to the respective subscale of the Positive and Negative Syndrome Scale (PANSS), the Brief Psychiatric Rating Scale (BPRS) or the Scales for Assessment of Positive Symptoms (SAPS) or any other published scale.

As not all studies will have used the same scale, we will extract data according to the following hierarchy: mean change of the PANSS positive symptoms subscale from baseline to endpoint, if not available mean change of the BPRS positive symptoms subscale, or if again not available the mean values at endpoint of the PANSS/BPRS positive symptoms subscale. The results of other rating scales will only be used if the instrument has been published in a peer-reviewed journal, because it has been shown that non-validated schizophrenia scales exaggerate differences (42).

### **Secondary outcomes**

Given the focus on treatments for positive symptoms, the results of this review will be informative for the treatment of positive symptoms. They will also describe how these interventions can have an effect on a number of other outcomes. With this aim, the following secondary outcomes will be assessed:

1. Acceptability, defined as the percentage of patients leaving the study early (‘dropout’) for any reason. All-cause discontinuation due to any reason combines efficacy, tolerability, and other factors and can therefore be considered as a measure of ‘acceptability of treatment’ (38) or of overall “effectiveness”;
2. Change in overall symptoms, measured by rating scales such as the PANSS or the BPRS, or any other published scale (e.g. the Manchester Scale) for the assessment of overall schizophrenic symptomatology. The results of other rating scales will only be used if the instrument has been published in a peer-reviewed journal;

3. Change in negative symptoms, measured by the respective subscale of the PANSS, or the “Scales for Assessment of Negative Symptoms” (SANS) or any other published scale;
4. Response, measured by the percentage of responders defined by reduction on the PANSS, BPRS or CGI scores, accepting the criteria used by study authors;
5. Percentage of patients with relapse, by definitions operationalized by rating scales, and, if not available, number of rehospitalisations due to psychopathology. We will not include data from studies that used non-operationalized relapse criteria (e.g. “clinical judgement”);
6. Adherence, measured by any published rating scale (e.g. “Adherence Therapy Patients Satisfaction Questionnaire”, “Adherence Rating Scale”);
7. Depression, measured by the Calgary Depression Scale for Schizophrenia, the Hamilton Depression Rating Scale, the Montgomery Asberg Depression Scale or other published symptom scales;
8. Quality of life, measured by any published rating scale (e.g. “Heinrichs quality of life scale”, Quality of Life Scale (QOLS));
9. Functioning, measured by rating scales such as the Global Assessment of Functioning or the Psychosocial Performance Scale, or any other published rating scale.
10. Tolerability, measured as the percentage of patients experiencing adverse events. Adverse events associated with psychological treatments are not covered as comprehensively as in trials on pharmacological treatments (43). However, there is a raising awareness of the importance of considering possible harms associated with psychological interventions (44). Therefore we will collect any available information in clinical studies about this outcome, using a classification proposed by Linden and colleagues (44): a) emergence of new symptoms; b) deterioration of existing symptoms; c) lack of improvement or deterioration of illness; d) prolongation of treatment; e) patient’s non-compliance; f) strains in the patient-therapist relationship; g) very good patient-therapist relationship, therapy dependency; h) strains or changes in family relations; i) strains or changes in work relations; l) any change in the life circumstances of the patient; m) stigmatization. Suicide attempts and any other possible adverse event related to psychological treatment will also be considered.
11. Mortality. Psychosocial treatments may actually reduce or, by contrast, increase overall mortality, in particular connected to suicidality. To test this, we will examine this outcome in terms of a) death for any reason, b) death due to natural causes and c) due to suicide.

## Search strategy

### *Electronic searches*

The following sources will be searched without restrictions for language or publication period: EMBASE, MEDLINE, PsycINFO, PUBMED. The search terms that will be used for PubMed are provided as Supplement material. We will also search the following international databases:

1. WHO International Clinical Trials Registry Platform (ICTRP)
2. BIOSIS
3. Cochrane Collaboration Controlled Trials Register
4. ClinicalTrials.gov.



### *Reference lists and other sources*

References of all selected studies will be inspected for other published reports and citations of unpublished studies. We will also inspect previous reviews conducted on psychological treatments for schizophrenia to check if some studies meet our inclusion criteria as well. In addition, we will contact the first author of each included study published in the last 30 years for missing information about their studies.

### **Identification and selection of studies**

Studies identified through electronic and manual searches will be listed with citation, titles and abstracts, in Citavi; duplicates will be excluded. The eligibility for inclusion process will be conducted in two separate stages:

1. Two authors will independently inspect title and abstracts identified in the literature searches, and exclude those not pertinent. Disagreement will be resolved by discussion, and where doubt still remains, we will acquire the full article for further inspection and the article will proceed to the next stage;
2. Once the full articles are obtained, two reviewers will independently assess them for eligibility. Disagreements will be resolved by discussion, and, if needed, a third senior author will be involved. When required, further information will be obtained from study authors.

### **Data extraction**

Two authors will independently extract data from all selected trials. When disagreement arises we will resolve it by discussion and, if needed, involving a third senior author. Where this is not sufficient we will contact the study authors.

The following data will be collected from each included study:

- Study citation, year(s) of study, registration number to trials registries, year of publication, location, setting, number of centers, sample size, diagnostic criteria, funding/sponsor (industry or academic);
- Methodology, including study design (type of RCT), number of arms, risk of bias (see below);
- Characteristics of study participants, including gender, age, details on diagnosis, number randomized to each arm, sociodemographic characteristics, whether psychological treatments naïve at baseline, or with previous experience with the experimental intervention);
- Characteristics of intervention, including number and frequency of sessions, therapy setting, expertise of therapist, researcher allegiance at study arm level;
- Outcome measures, including information on whether an Intention to Treat (ITT) approach has been used and how it was defined.

The two reviewers will independently input data into an Access database especially created for this study. The software will automatically detect any inconsistencies, and they will be resolved by discussion.

### *Measurement of treatment effect*

Relative treatment effects

- Continuous outcomes: For continuous outcomes we will use the standardized mean difference (SMD), because we expect that the studies use different rating scales of overall schizophrenia symptomatology.

- Dichotomous outcomes: The effect size for dichotomous outcomes will be the risk ratio (RR) and its 95% confidence intervals (CIs).

#### Relative treatment ranking

We will estimate the probability for each intervention to be ranked at each possible place, given the relative effect sizes as estimated in NMA. As described in Salanti et al (45) we will obtain a hierarchy of the competing interventions using the Surface Under the Cumulative Ranking curve (SUCRA) and mean ranks. SUCRA values will be expressed as percentage, showing the relative probability of an intervention to be among the best options.

#### *Dealing with missing outcome data and missing statistics*

For continuous outcomes we will extract data for all randomized patients if possible, and we will give preference to data based on mixed-effect models of repeated measurements of multiple imputations over last-observation-carried-forward data.

We will use published standard deviations (SDs), where available. When standard errors instead of SDs are presented, the former will be converted to SDs (46). If both are missing we will estimate SDs from p-values or confidence intervals, as described in Section 7.7.3 of the Cochrane Handbook for Systematic Reviews (47). If none of these options is viable we will contact the original authors. When no information can be obtained we will derive SDs from those of the other studies using a validated imputation technique (46).

For dichotomous outcomes, everyone allocated to the intervention will be counted whether they completed the follow up or not. If the authors applied such a strategy, we will use their results. If the original authors presented only the results of the per-protocol or completer population, we will assume that those participants lost to follow-up would not have changed in a given outcome. In terms of efficacy this means that they would be conservatively considered to have not responded to treatment or control. In terms of tolerability it would mean that participants would not have developed a side-effect.

#### **Risk of bias assessment**

Risk of bias will be assessed for each included study using the Cochrane Collaboration 'risk of bias' tool (47, 48). The following domains will be considered:

1. Sequence generation: was the allocation sequence adequately generated?
2. Allocation concealment: was allocation adequately concealed?
3. Blinding of participants: was knowledge of the allocated treatment adequately prevented during the study? Given the peculiarity of the included studies, in which the therapist cannot be blind, we will consider under this item only if a way was found to keep patients unaware of the treatment they were receiving (even if we expect this will not be likely);
4. Blinding of outcome assessors: were outcome evaluated by blind raters? Were adequate measures taken to prevent them to discover treatment allocation during the study?
5. Incomplete outcome data: were incomplete outcome data adequately addressed?
6. Selective reporting: are reports of the study free from suggestion of selective outcome reporting?
7. Researcher's allegiance: do the researchers involved have a vested interest for the psychological treatment under investigation? We will additionally consider this point as possible source of bias, since it has been claimed to be relevant in trials on psychological interventions (49)(50, 51). An

1  
2  
3 evaluation of high risk of bias will be given, for example, when the authors are founders of the  
4 therapy or have written a manual for that therapy.  
5

6 A description of what was reported about the same domains in each study will be provided, and a  
7 judgement on the risk of bias will be made for each one of them, based on the following three  
8 categories: 'high risk of bias', 'low risk of bias' and 'unclear risk of bias' where information are not  
9 sufficient to make a judgement. Two independent review authors will assess the risk of bias in  
10 selected studies. Any disagreement will be resolved through discussion. Where necessary, the  
11 authors of the studies will be contacted for further information. Studies will be classified as having  
12 low risk of bias if none of the domains above was rated as high risk of bias and three or less were  
13 rated as unclear risk; moderate if one was rated as high risk of bias or none was rated as high risk of  
14 bias but four or more were rated as unclear risk, and all other cases will be assumed to pertain to  
15 high risk of bias (52). We will not include studies in the data analyses whose sequence generation  
16 was at high risk of bias (e.g. randomization by the date of birth or day of the week). Effects of high  
17 risk of bias in the other domains will be analyzed by sensitivity analyses.  
18  
19  
20  
21

## 22 **Data analysis**

### 23 *Characteristics of the included studies*

24 We will produce descriptive statistics and study population characteristics across all eligible trials,  
25 describing the types of comparisons and other clinical or methodological variables, such as age,  
26 duration of illness, co-medication, country, duration of study and number of session.  
27  
28

### 29 *Two-step procedure*

30 In a first step we will perform series of conventional pair-wise meta-analyses by combining studies  
31 that compared the same interventions, including the comparison between active treatments and the  
32 different control arms. In subgroups with very few RCTs available or if the requirements of network  
33 meta-analysis are not met it can be that network meta-analysis will not be appropriate and in this  
34 case, conventional pairwise meta-analysis will be the most straightforward approach. As  
35 heterogeneity is likely, a random effects model will be used. In a second step we will then perform a  
36 network meta-analysis within a frequentist framework.  
37  
38  
39  
40

### 41 *Assessment of heterogeneity*

42 The heterogeneity (variability in relative treatment effects within the same treatment comparison)  
43 will be measured with the tau-squared (the variance of the random effects distribution). The  
44 heterogeneity variance will be assumed common across the various treatment comparisons (grouped  
45 by comparison type) and the empirical distributions will be used to characterize the amount of  
46 heterogeneity as low, moderate or high using the first and third quantiles (53–55). Potential reasons  
47 for heterogeneity will be explored by subgroup analysis (see below).  
48  
49  
50

### 51 *Assessment of the transitivity assumption*

52 Joint analysis of treatments can be misleading if the network is substantially intransitive. We assume  
53 that patients who fulfill the inclusion criteria outlined in criteria for considering studies for this  
54 review section are equally likely to be randomised to any of the interventions that we plan to  
55 compare. We will need to investigate the distribution of clinical and methodological variables that  
56 can act as effect modifiers across treatment comparisons (56). We have maximized the chances of  
57  
58  
59  
60

1  
2  
3 transitivity in our network with regard to clinical variables by limiting our samples to participants  
4 with schizophrenia and excluding specific subgroups like first episode patients or patients with  
5 prevalent negative symptoms. Other clinical or methodological variables that may influence the  
6 efficacy of psychological interventions include administration mode and frequency of the treatment  
7 (like number of sessions and experience of the therapist), baseline severity (see below, “Investigation  
8 of heterogeneity and inconsistency”), and blinding, which will also be assessed in sensitivity analyses.  
9 We will investigate if these variables are similarly distributed across studies grouped by comparison.  
10 The comparability of studies comparing the intervention with treatment as usual or waiting list  
11 conditions with those that provide head-to-head evidence will be examined carefully.  
12  
13

### 14 15 *Network meta-analysis*

16 Network meta-analysis combines direct and indirect evidence for all relative treatment effects and  
17 can therefore provide estimates with maximum power and increased precision (57). If the collected  
18 studies appear to be sufficiently similar with respect to the distribution of effect modifiers (refer  
19 Assessment of transitivity assumption section), we will conduct a random-effects NMA to synthesize  
20 all evidence for each outcome, and obtain a comprehensive ranking of all treatments. We will  
21 assume a single heterogeneity parameter for each network. We will present the summary SMDs or  
22 RRs for all pairwise comparisons in a league table. We will also estimate the prediction intervals to  
23 assess how much the common heterogeneity affects the relative effect with respect to the extra  
24 uncertainty anticipated in a future study. To rank the various treatments for each outcome, we will  
25 use the surface under the cumulative ranking curve (SUCRA) and the mean ranks.  
26  
27  
28  
29

### 30 *Assessment of inconsistency*

31 The strategical and conceptual evaluation of transitivity will be supplemented with a statistical  
32 evaluation of consistency, the agreement between direct and indirect evidence. We will employ local  
33 as well as global methods to evaluate consistency (58). Local methods detect ‘hot spots’ of  
34 inconsistency, evidence loops that are inconsistent or comparisons for which direct and indirect  
35 evidence disagree. We will employ a method that separates direct evidence from indirect evidence  
36 provided by the entire network and then evaluate the agreement of these two pieces of evidence  
37 (59). We will also evaluate consistency in the entire network by calculating the design-by-treatment  
38 interaction test and I-squared for network heterogeneity, inconsistency, and for both (60). Tests for  
39 inconsistency are known to have low power, and empirical evidence has suggested that 10% of  
40 evidence loops published in the medical literature are expected to be inconsistent (61). Therefore,  
41 interpretation of the statistical inference about inconsistency will be carried out with caution and  
42 possible sources of inconsistency will be explored even in the absence of evidence for inconsistency.  
43  
44  
45  
46

### 47 *Investigation of heterogeneity and inconsistency*

48 We expect small amounts of heterogeneity and inconsistency to be present given the variety of study  
49 settings we plan to include. The following potential effect modifiers of the primary outcome will be  
50 explored by subgroup analyses:

- 51 a) Number of sessions
  - 52 b) Study duration
  - 53 c) Setting: individual vs group
  - 54 d) Expertise of the therapist
  - 55 e) Baseline severity (PANSS or BPRS score at baseline)
- 56  
57

1  
2  
3 f) Different types of patients, with a different clinical outline concerning symptoms (if identified).  
4

#### 5 *Sensitivity analyses*

6 We will explore the following sensitivity analyses by excluding:

- 7 a) studies in which the outcome assessor was not blind (open studies)  
8 b) studies that presented only completer analyses  
9 c) studies characterized as pertaining to high risk of bias  
10 d) studies with high risk of bias in researchers' allegiance  
11 e) studies focused on treatment resistant patients (study defined)  
12 f) studies with a non-active comparison group.  
13  
14  
15

#### 16 *Publication bias*

17 We will first examine funnel plots of pairwise MAs if there are 10 or more studies included. We will  
18 also explore the association between study size and effect size with a comparison-adjusted funnel  
19 plot that has been adapted to network meta-analysis (62).  
20  
21

#### 22 *Evaluating the quality of the evidence*

23 The quality of evidence contributing to each network estimate will be evaluated using an adaptation  
24 of the Grading of Recommendations Assessment, Development and Evaluation (GRADE) framework  
25 specifically developed for network meta-analysis (58). We will characterize the credibility of a body  
26 of evidence based on the study limitations, imprecision, heterogeneity/inconsistency, indirectness,  
27 and publication bias.  
28  
29  
30

#### 31 *Statistical software*

32 The analysis and presentation of results will be performed using the Stata packages network and  
33 network\_graphs, the R package netmeta.  
34  
35

## 36 **ETHICS AND DISSEMINATION**

37 This review does not require ethical approval. Findings will be published in peer reviewed scientific  
38 journals, granting open access, and the database will be made publicly available (in agreement with  
39 European Research Council Guidelines on Implementation of Open Access to Scientific Publications  
40 and Research Data ([http://ec.europa.eu/research/participants/data/ref/h2020/other/hi/oa-pilot/h2020-hi-erc-oa-guide\\_en.pdf](http://ec.europa.eu/research/participants/data/ref/h2020/other/hi/oa-pilot/h2020-hi-erc-oa-guide_en.pdf))).  
41  
42  
43  
44  
45

## 46 **REFERENCES**

- 47 1. Vos T, Flaxman AD, Naghavi M, Lozano R, Michaud C, Ezzati M et al. Years lived with disability  
48 (YLDs) for 1160 sequelae of 289 diseases and injuries 1990-2010: a systematic analysis for the Global  
49 Burden of Disease Study 2010. *Lancet* 2012; 380(9859):2163–96.  
50  
51 2. Leucht S, Cipriani A, Spineli L, Mavridis D, Orey D, Richter F et al. Comparative efficacy and  
52 tolerability of 15 antipsychotic drugs in schizophrenia: a multiple-treatments meta-analysis. *Lancet*  
53 2013; 382(9896):951–62.  
54  
55  
56  
57  
58  
59  
60

- 1  
2  
3 3. National Collaborating Centre for Mental Health. Core interventions in the treatment and  
4 management of schizophrenia in adults in primary and secondary care (Clinical Guideline CG82).  
5 London; 2009.
- 6  
7 4. Buchanan RW, Kreyenbuhl J, Kelly DL, Noel JM, Boggs DL, Fischer BA et al. The 2009 schizophrenia  
8 PORT psychopharmacological treatment recommendations and summary statements. *Schizophr Bull*  
9 2010; 36(1):71–93.
- 10  
11 5. Pinquart M, Oslejsek B, Teubert D. Efficacy of systemic therapy on adults with mental disorders: A  
12 meta-analysis. *Psychother Res* 2016; 26(2):241–57.
- 13  
14 6. Ruddy R, Milnes D. Art therapy for schizophrenia or schizophrenia-like illnesses. *Cochrane*  
15 *Database Syst Rev* 2005; (4):CD003728.
- 16  
17 7. Jones C, Hacker D, Cormac I, Meaden A, Irving CB. Cognitive behaviour therapy versus other  
18 psychosocial treatments for schizophrenia. *Cochrane Database Syst Rev* 2012; (4):CD008712.
- 19  
20 8. Lutgens D, Garipey G, Malla A. Psychological and psychosocial interventions for negative  
21 symptoms in psychosis: Systematic review and meta-analysis. *Br J Psychiatry* 2017; 210(5):324–32.
- 22  
23 9. Zimmermann G, Favrod J, Trieu VH, Pomini V. The effect of cognitive behavioral treatment on the  
24 positive symptoms of schizophrenia spectrum disorders: A meta-analysis. *Schizophr Res* 2005;  
25 77(1):1–9.
- 26  
27 10. Turner DT, van der Gaag M, Karyotaki E, Cuijpers P. Psychological interventions for psychosis: a  
28 meta-analysis of comparative outcome studies. *Am J Psychiatry* 2014; 171(5):523–38.
- 29  
30 11. Naeem F, Asmer MS, Khoury B, Kingdon D, Farooq S. Acceptance and Commitment Therapy for  
31 schizophrenia and related disorders (Protocol). *Cochrane Database of Systematic Reviews* 2015; (6).
- 32  
33 12. Gray R, Bressington D, Ivanicka A, Hardy S, Jones M, Schulz M et al. Is adherence therapy an  
34 effective adjunct treatment for patients with schizophrenia spectrum disorders? A systematic review  
35 and meta-analysis. *BMC Psychiatry* 2016; 16:90.
- 36  
37 13. Marshall M, Lockwood A. Assertive community treatment for people with severe mental  
38 disorders. *Cochrane Database Syst Rev* 2000; (2):CD001089.
- 39  
40 14. Dieterich M, Irving CB, Bergman H, Khokhar MA, Park B, Marshall M. Intensive case management  
41 for severe mental illness. *Cochrane Database Syst Rev* 2017; 1:CD007906.
- 42  
43 15. Jauhar S, McKenna PJ, Radua J, Fung E, Salvador R, Laws KR. Cognitive-behavioural therapy for  
44 the symptoms of schizophrenia: systematic review and meta-analysis with examination of potential  
45 bias. *Br J Psychiatry* 2014; 204(1):20–9.
- 46  
47 16. van der Gaag M, Valmaggia LR, Smit F. The effects of individually tailored formulation-based  
48 cognitive behavioural therapy in auditory hallucinations and delusions: A meta-analysis. *Schizophr*  
49 *Res* 2014; 156(1):30–7.
- 50  
51 17. Hazell CM, Hayward M, Cavanagh K, Strauss C. A systematic review and meta-analysis of low  
52 intensity CBT for psychosis. *Clin Psychol Rev* 2016; 45:183–92.
- 53  
54 18. Kennedy L, Xyrichis A. Cognitive Behavioral Therapy Compared with Non-specialized Therapy for  
55 Alleviating the Effect of Auditory Hallucinations in People with Reoccurring Schizophrenia: A  
56 Systematic Review and Meta-analysis. *Community Ment Health J* 2017; 53(2):127–33.

19. Cella M, Preti A, Edwards C, Dow T, Wykes T. Cognitive remediation for negative symptoms of schizophrenia: A network meta-analysis. *Clin Psychol Rev* 2017; 52:43–51.
20. Ren J, Xia J. Dance therapy for schizophrenia. *Cochrane Database Syst Rev* 2013; (10):CD006868.
21. Pitschel-Walz G, Leucht S, Bauml J, Kissling W, Engel RR. The effect of family interventions on relapse and rehospitalization in schizophrenia—a meta-analysis. *Schizophr Bull* 2001; 27(1):73–92.
22. Pharoah F, Mari J, Rathbone J, Wong W. Family intervention for schizophrenia. *Cochrane Database Syst Rev* 2010; (12):CD000088.
23. Orfanos S, Banks C, Priebe S. Are Group Psychotherapeutic Treatments Effective for Patients with Schizophrenia? A Systematic Review and Meta-Analysis. *Psychother Psychosom* 2015; 84(4):241–9.
24. Roder V, Mueller DR, Mueser KT, Brenner HD. Integrated psychological therapy (IPT) for schizophrenia: Is it effective? *Schizophr Bull* 2006; 32 Suppl 1:S81-93.
25. Eichner C, Berna F. Acceptance and Efficacy of Metacognitive Training (MCT) on Positive Symptoms and Delusions in Patients With Schizophrenia: A Meta-analysis Taking Into Account Important Moderators. *Schizophr Bull* 2016; 42(4):952–62.
26. Aust J, Bradshaw T. Mindfulness interventions for psychosis: A systematic review of the literature. *J Psychiatr Ment Health Nurs* 2017; 24(1):69–83.
27. Geretsegger M, Mössler KA, Bieleninik Ł, Chen X-J, Heldal TO, Gold C. Music therapy for people with schizophrenia and schizophrenia-like disorders. *Cochrane Database Syst Rev* 2017; 5:CD004025.
28. Malmberg L, Fenton M. Individual psychodynamic psychotherapy and psychoanalysis for schizophrenia and severe mental illness. *Cochrane Database Syst Rev* 2001; (3):CD001360.
29. Pekkala E, Merinder L. Psychoeducation for schizophrenia. *Cochrane Database Syst Rev* 2000; (4):CD002831.
30. Almerie MQ, Okba Al Marhi M, Jawoosh M, Alsabbagh M, Matar HE, Maayan N et al. Social skills programmes for schizophrenia. *Cochrane Database Syst Rev* 2015; (6):CD009006.
31. Buckley LA, Maayan N, Soares-Weiser K, Adams CE. Supportive therapy for schizophrenia. *Cochrane Database Syst Rev* 2015; (4):CD004716.
32. Hutton B, Salanti G, Caldwell DM, Chaimani A, Schmid CH, Cameron C et al. The PRISMA extension statement for reporting of systematic reviews incorporating network meta-analyses of health care interventions: Checklist and explanations. *Ann Intern Med* 2015; 162(11):777–84.
33. Shamseer L, Moher D, Clarke M, Ghersi D, Liberati A, Petticrew M et al. Preferred reporting items for systematic review and meta-analysis protocols (PRISMA-P) 2015: Elaboration and explanation. *BMJ* 2015; 349:g7647.
34. Egger M, Zellweger-Zahner T, Schneider M, Junker C, Lengeler C, Antes G. Language bias in randomised controlled trials published in English and German. *Lancet* 1997; 350(9074):326–9.
35. Wu T, Li Y, Liu G, Bian Z, Li J, Zhang J, Xie L, Ni J, editor. Investigation of authenticity of 'claimed' randomized controlled trials (RCTs) and quality assessment of RCT reports published in China; 2006.
36. Woodhead M. 80% of China's clinical trial data are fraudulent, investigation finds. *BMJ* 2016; 355:i5396.
37. Carpenter WT, JR, Buchanan RW. Schizophrenia. *N Engl J Med* 1994; 330(10):681–90.

- 1  
2  
3 38. Adams,C.E., Coutinho,E., Davis,J.M., Duggan,L., Essali,A., Fenton,M., Li,C., Jayaram,M., Leucht,S.,  
4 Tharyan,P., Välimäki,M. Cochrane Schizophrenia Group. The Cochrane Library. Chichester, UK: John  
5 Wiley & Sons Ltd; 2011.
- 6  
7 39. Leucht S, Leucht C, Huhn M, Chaimani A, Mavridis D, Helfer B et al. Sixty Years of Placebo-  
8 Controlled Antipsychotic Drug Trials in Acute Schizophrenia: Systematic Review, Bayesian Meta-  
9 Analysis, and Meta-Regression of Efficacy Predictors. *Am J Psychiatry* 2017; 174(10):927–42.
- 10  
11 40. Zhu Y, Li C, Huhn M, Rothe P, Krause M, Bighelli I et al. How well do patients with a first episode  
12 of schizophrenia respond to antipsychotics: A systematic review and meta-analysis. *Eur*  
13 *Neuropsychopharmacol* 2017; 27(9):835–44.
- 14  
15 41. Furukawa TA, Noma H, Caldwell DM, Honyashiki M, Shinohara K, Imai H et al. Waiting list may be  
16 a nocebo condition in psychotherapy trials: a contribution from network meta-analysis. *Acta*  
17 *Psychiatr Scand* 2014; 130(3):181–92.
- 18  
19 42. Marshall M, Lockwood A, Bradley C, Adams C, Joy C, Fenton M. Unpublished rating scales: a  
20 major source of bias in randomised controlled trials of treatments for schizophrenia. *Br J Psychiatry*  
21 2000; 176:249–52.
- 22  
23 43. Vaughan B, Goldstein MH, Alikakos M, Cohen LJ, Serby MJ. Frequency of reporting of adverse  
24 events in randomized controlled trials of psychotherapy vs. psychopharmacotherapy. *Compr*  
25 *Psychiatry* 2014; 55(4):849–55.
- 26  
27 44. Linden M, Schermuly-Haupt M-L. Definition, assessment and rate of psychotherapy side effects.  
28 *World Psychiatry* 2014; 13(3):306–9.
- 29  
30 45. Salanti G, Ades AE, Ioannidis JPA. Graphical methods and numerical summaries for presenting  
31 results from multiple-treatment meta-analysis: an overview and tutorial. *J Clin Epidemiol* 2011;  
32 64(2):163–71.
- 33  
34 46. Furukawa TA, Barbui C, Cipriani A, Brambilla P, Watanabe N. Imputing missing standard  
35 deviations in meta-analyses can provide accurate results. *J Clin Epidemiol* 2006; 59(1):7–10.
- 36  
37 47. Higgins JPT, editor. *Cochrane Handbook for Systematic Reviews of Interventions*. Version 5.1.0  
38 [updated March 2011]; 2011.
- 39  
40 48. Higgins JPT, Altman DG, Sterne JAC (editors), editor. Assessing risk of bias in included studies. In:  
41 Higgins JPT, Churchill R, Chandler J, Cumpston MS (editors), *Cochrane Handbook for Systematic*  
42 *Reviews of Interventions version 5.2.0 (updated June 2017)*; Cochrane, 2017. Available from: URL:  
43 <http://training.cochrane.org/handbook>.
- 44  
45 49. Dragioti E, Dimoliatis I, Evangelou E. Disclosure of researcher allegiance in meta-analyses and  
46 randomised controlled trials of psychotherapy: a systematic appraisal. *BMJ Open* 2015;  
47 5(6):e007206.
- 48  
49 50. Lieb K, Osten-Sacken J von der, Stoffers-Winterling J, Reiss N, Barth J. Conflicts of interest and  
50 spin in reviews of psychological therapies: a systematic review. *BMJ Open* 2016; 6(4):e010606.
- 51  
52 51. Munder T, Brutsch O, Leonhart R, Gerger H, Barth J. Researcher allegiance in psychotherapy  
53 outcome research: an overview of reviews. *Clin Psychol Rev* 2013; 33(4):501–11.
- 54  
55  
56  
57  
58  
59  
60



- 1  
2  
3 52. Furukawa TA, Salanti G, Atkinson LZ, Leucht S, Ruhe HG, Turner EH et al. Comparative efficacy  
4 and acceptability of first-generation and second-generation antidepressants in the acute treatment  
5 of major depression: Protocol for a network meta-analysis. *BMJ Open* 2016; 6(7):e010919.  
6  
7 53. Turner RM, Davey J, Clarke MJ, Thompson SG, Higgins JP. Predicting the extent of heterogeneity  
8 in meta-analysis, using empirical data from the Cochrane Database of Systematic Reviews. *Int J*  
9 *Epidemiol* 2012; 41(3):818–27.  
10  
11 54. Rhodes KM, Turner RM, Higgins JPT. Empirical evidence about inconsistency among studies in a  
12 pair-wise meta-analysis. *Res Synth Methods* 2016; 7(4):346–70.  
13  
14 55. Rhodes KM, Turner RM, White IR, Jackson D, Spiegelhalter DJ, Higgins JPT. Implementing  
15 informative priors for heterogeneity in meta-analysis using meta-regression and pseudo data. *Stat*  
16 *Med* 2016; 35(29):5495–511.  
17  
18 56. Salanti G. Indirect and mixed-treatment comparison, network, or multiple-treatments meta-  
19 analysis: Many names, many benefits, many concerns for the next generation evidence synthesis  
20 tool. *Res Synth Methods* 2012; 3(2):80–97.  
21  
22 57. Salanti G, Higgins JPT, Ades AE, Ioannidis JPA. Evaluation of networks of randomized trials. *Stat*  
23 *Methods Med Res* 2008; 17(3):279–301.  
24  
25 58. Salanti G, Del Giovane C, Chaimani A, Caldwell DM, Higgins JPT. Evaluating the quality of evidence  
26 from a network meta-analysis. *PLoS One* 2014; 9(7):e99682.  
27  
28 59. Dias S, Welton NJ, Caldwell DM, Ades AE. Checking consistency in mixed treatment comparison  
29 meta-analysis. *Stat Med* 2010; 29(7-8):932–44.  
30  
31 60. Higgins JPT, Jackson D, Barrett JK, Lu G, Ades AE, White IR. Consistency and inconsistency in  
32 network meta-analysis: Concepts and models for multi-arm studies. *Res Synth Methods* 2012;  
33 3(2):98–110.  
34  
35 61. Veroniki AA, Vasiliadis HS, Higgins JPT, Salanti G. Evaluation of inconsistency in networks of  
36 interventions. *Int J Epidemiol* 2013; 42(1):332–45.  
37  
38 62. Chaimani A, Salanti G. Using network meta-analysis to evaluate the existence of small-study  
39 effects in a network of interventions. *Res Synth Methods* 2012; 3(2):161–76.  
40  
41

42 **Authors' contributions:** IB and SL designed this study, drafted and critically revised the  
43 protocol. IB will screen search results for inclusion, conduct data extraction and data analysis, and  
44 draft the final manuscript. SL will assist with data extraction and analysis, and revise the final  
45 manuscript. CR and SW will screen search results for inclusion and conduct data extraction. GS  
46 provided substantial methodological advice in planning the study, and will assist with data analysis.  
47 CB and TF contributed with clinical and methodological input in planning the study. All authors  
48 contributed to and have approved the final manuscript.  
49  
50

51  
52 **Collaborators:** Samantha Roberts helped us to conduct the literature searches. Maximilian Huhn,  
53 Johannes Schneider-Thoma, Marc Krause and Costanza Carmi provided help and suggestions.  
54  
55  
56  
57  
58  
59  
60

1  
2  
3 **Funding:** This project has received funding from the European Union's Horizon 2020 Research and  
4 Innovation Programme under the Marie Skłodowska-Curie grant agreement N° 701717. This work  
5 was also supported by the German Research Foundation (DFG) and the Technical University of  
6 Munich within the Open Access Publishing Funding Programme. The funder had no role in developing  
7 the protocol.  
8  
9

10 **Competing interests:** SL in the past 3 years has received honoraria for consulting from Roche,  
11 TEVA, Otsuka, Lundbeck, and LB Pharma; for lectures from Otsuka, Lundbeck, Janssen, ICON, Lilly,  
12 Sanofi Aventis, AOP Orphan, Roche, and Servier; and for a publication from Roche. TAF has received  
13 lecture fees from Eli Lilly, Janssen, Meiji, Mitsubishi-Tanabe, MSD and Pfizer and consultancy fees  
14 from Takeda Science Foundation. He has received royalties from Igaku-Shoin and Nihon Bunka  
15 Kagaku-sha publishers. He has received research support from Mochida and Mitsubishi-Tanabe.  
16  
17  
18  
19  
20  
21  
22  
23  
24  
25  
26  
27  
28  
29  
30  
31  
32  
33  
34  
35  
36  
37  
38  
39  
40  
41  
42  
43  
44  
45  
46  
47  
48  
49  
50  
51  
52  
53  
54  
55  
56  
57  
58  
59  
60

## Search terms for Pubmed

("Schizophrenia"[Mesh] OR "Paranoid Disorders"[Mesh] OR schizo\*[Title/Abstract] OR psychotic\*[Title/Abstract] OR psychosis[Title/Abstract] OR psychoses[Title/Abstract]) AND ("Psychotherapy"[Mesh] or "Behavior Therapy"[Mesh] or "Cognitive Therapy"[Mesh] or "Complementary Therapies"[Mesh] or "Psychoanalysis"[Mesh] or "Counseling"[Mesh] or "Hypnosis"[Mesh] or "Association"[Mesh] or "Association Learning"[Mesh] OR abreaction[Title/Abstract] OR "acceptance[Title/Abstract] AND commitment therapy"[Title/Abstract] OR "acting out"[Title/Abstract] OR adlerian[Title/Abstract] OR "analytical psychotherapy"[Title/Abstract] OR "analytical psychotherapies"[Title/Abstract] OR "anger control"[Title/Abstract] OR "anger management"[Title/Abstract] OR "animal therapy"[Title/Abstract] OR "animal therapies"[Title/Abstract] OR "art therapy"[Title/Abstract] OR "art therapies"[Title/Abstract] OR "assertive training"[Title/Abstract] OR "assertiveness training"[Title/Abstract] OR "attention training technique"[Title/Abstract] OR "autogenic training"[Title/Abstract] OR autosuggestion[Title/Abstract] OR "aversion therapy"[Title/Abstract] OR "aversion therapies"[Title/Abstract] OR "balint group"[Title/Abstract] OR befriending[Title/Abstract] OR "behavior contracting"[Title/Abstract] OR "behavior modification"[Title/Abstract] OR "behavior regulation"[Title/Abstract] OR "behavior therapy"[Title/Abstract] OR "behavior therapies"[Title/Abstract] OR "behaviour contracting"[Title/Abstract] OR "behaviour modification"[Title/Abstract] OR "behaviour regulation"[Title/Abstract] OR "behaviour therapy"[Title/Abstract] OR "behaviour therapies"[Title/Abstract] OR bibliotherapy[Title/Abstract] OR bibliotherapies[Title/Abstract] OR biofeedback[Title/Abstract] OR "body psychotherapy"[Title/Abstract] OR "body psychotherapies"[Title/Abstract] OR "brief psychotherapy"[Title/Abstract] OR "brief psychotherapies"[Title/Abstract] OR "caregiver support"[Title/Abstract] OR cbt[Title/Abstract] OR "client centre"[Title/Abstract] OR "client center"[Title/Abstract] OR "cognitive behavior"[Title/Abstract] OR "cognitive behavioral"[Title/Abstract] OR "cognitive intervention"[Title/Abstract] OR "cognitive interventions"[Title/Abstract] OR "cognitive rehabilitation"[Title/Abstract] OR "cognitive remediation"[Title/Abstract] OR "cognitive technique"[Title/Abstract] OR "cognitive techniques"[Title/Abstract] OR "cognitive therapy"[Title/Abstract] OR "cognitive therapies"[Title/Abstract] OR "cognitive treatment"[Title/Abstract] OR "cognitive treatments"[Title/Abstract] OR "color therapy"[Title/Abstract] OR "color therapies"[Title/Abstract] OR "colour therapy"[Title/Abstract] OR "colour therapies"[Title/Abstract] OR "compassionate mind training"[Title/Abstract] OR "conjoint therapy"[Title/Abstract] OR "conjoint therapies"[Title/Abstract] OR "contingency management"[Title/Abstract] OR "conversational therapy"[Title/Abstract] OR "conversational therapies"[Title/Abstract] OR "conversion therapy"[Title/Abstract] OR "conversion therapies"[Title/Abstract] OR "coping skills"[Title/Abstract] OR counseling[Title/Abstract] OR counselling[Title/Abstract] OR countertransference[Title/Abstract] OR "couples therapy"[Title/Abstract] OR "couples therapies"[Title/Abstract] OR "covert sensitization"[Title/Abstract] OR "covert sensitisation"[Title/Abstract] OR "crisis intervention"[Title/Abstract] OR "dance therapy"[Title/Abstract] OR "dance therapies"[Title/Abstract] OR dialectic[Title/Abstract] OR dialectical[Title/Abstract] OR "dream analysis"[Title/Abstract] OR eclectic[Title/Abstract] OR "emotion focused"[Title/Abstract] OR "emotionally focused"[Title/Abstract] OR "emotional freedom technique"[Title/Abstract] OR "encounter group therapy"[Title/Abstract] OR "encounter group therapies"[Title/Abstract] OR "existential therapy"[Title/Abstract] OR "existential therapies"[Title/Abstract] OR "experiential

1  
2  
3 psychotherapy"[Title/Abstract] OR "experiential psychotherapies"[Title/Abstract] OR "exposure  
4 therapy"[Title/Abstract] OR "exposure therapies"[Title/Abstract] OR "expressive  
5 psychotherapy"[Title/Abstract] OR "expressive psychotherapies"[Title/Abstract] OR "eye movement  
6 desensitization"[Title/Abstract] OR "eye movement desensitisation"[Title/Abstract] OR "family  
7 intervention"[Title/Abstract] OR "family interventions"[Title/Abstract] OR "family  
8 therapy"[Title/Abstract] OR "family therapies"[Title/Abstract] OR "feminist therapy"[Title/Abstract]  
9 OR "feminist therapies"[Title/Abstract] OR "free association"[Title/Abstract] OR  
10 freudian"[Title/Abstract] OR "geriatric psychotherapy"[Title/Abstract] OR "geriatric  
11 psychotherapies"[Title/Abstract] OR "gestalt therapy"[Title/Abstract] OR "gestalt  
12 therapies"[Title/Abstract] OR griefwork"[Title/Abstract] OR "group intervention"[Title/Abstract] OR  
13 "group interventions"[Title/Abstract] OR "group psychotherapy"[Title/Abstract] OR "group  
14 psychotherapies"[Title/Abstract] OR "group therapy"[Title/Abstract] OR "group  
15 therapies"[Title/Abstract] OR "guided imagery"[Title/Abstract] OR "holistic  
16 psychotherapy"[Title/Abstract] OR "holistic psychotherapies"[Title/Abstract] OR "humanistic  
17 psychotherapy"[Title/Abstract] OR "humanistic psychotherapies"[Title/Abstract] OR  
18 hypnosis"[Title/Abstract] OR hypnotherapy"[Title/Abstract] OR hypnotherapies"[Title/Abstract] OR  
19 hypnotizability"[Title/Abstract] OR hypnotisability"[Title/Abstract] OR imagery"[Title/Abstract] OR  
20 "implosive therapy"[Title/Abstract] OR "implosive therapies"[Title/Abstract] OR "individual  
21 psychotherapy"[Title/Abstract] OR "individual psychotherapies"[Title/Abstract] OR "insight  
22 therapy"[Title/Abstract] OR "insight therapies"[Title/Abstract] OR "integrated psychological  
23 therapy"[Title/Abstract] OR "integrative psychotherapy"[Title/Abstract] OR "integrative  
24 psychotherapies"[Title/Abstract] OR "integrative therapy"[Title/Abstract] OR "integrative  
25 therapies"[Title/Abstract] OR interpersonal"[Title/Abstract] OR jungian"[Title/Abstract] OR  
26 kleinian"[Title/Abstract] OR logotherapy"[Title/Abstract] OR logotherapies"[Title/Abstract] OR  
27 "marathon group therapy"[Title/Abstract] OR "marathon group therapies"[Title/Abstract] OR  
28 "marital therapy"[Title/Abstract] OR "marital therapies"[Title/Abstract] OR meditation"[Title/Abstract]  
29 OR "mental healing"[Title/Abstract] OR "metacognitive therapy"[Title/Abstract] OR "metacognitive  
30 therapies"[Title/Abstract] OR "metacognitive training"[Title/Abstract] OR "milieu  
31 therapy"[Title/Abstract] OR "milieu therapies"[Title/Abstract] OR mindfulness"[Title/Abstract] OR  
32 "morita therapy"[Title/Abstract] OR "morita therapies"[Title/Abstract] OR multimodal"[Title/Abstract]  
33 OR "music therapy"[Title/Abstract] OR "music therapies"[Title/Abstract] OR "narrative  
34 therapy"[Title/Abstract] OR "narrative therapies"[Title/Abstract] OR "nondirective  
35 therapy"[Title/Abstract] OR "nondirective therapies"[Title/Abstract] OR "object  
36 relations"[Title/Abstract] OR "person centred therapy"[Title/Abstract] OR "person centred  
37 therapies"[Title/Abstract] OR "person centered therapy"[Title/Abstract] OR "person centered  
38 therapies"[Title/Abstract] OR "personal construct therapy"[Title/Abstract] OR "personal construct  
39 therapies"[Title/Abstract] OR "persuasion therapy"[Title/Abstract] OR "persuasion  
40 therapies"[Title/Abstract] OR "pet therapy"[Title/Abstract] OR "pet therapies"[Title/Abstract] OR  
41 "play therapy"[Title/Abstract] OR "play therapies"[Title/Abstract] OR "primal therapy"[Title/Abstract]  
42 OR "primal therapies"[Title/Abstract] OR "problem solving"[Title/Abstract] OR  
43 psychoanalyse"[Title/Abstract] OR psychoanalysed"[Title/Abstract] OR psychoanalysis"[Title/Abstract]  
44 OR psychoanalytic"[Title/Abstract] OR psychodrama"[Title/Abstract] OR psychodynamic"[Title/Abstract]  
45 OR psychoeducate"[Title/Abstract] OR psychoeducation"[Title/Abstract] OR  
46 psychoeducating"[Title/Abstract] OR psychologic"[Title/Abstract] OR psychological"[Title/Abstract] OR  
47 psychologically"[Title/Abstract] OR "psychological therapy"[Title/Abstract] OR "psychological  
48 therapies"[Title/Abstract] OR "psychosocial treatment"[Title/Abstract] OR "psychosocial  
49  
50  
51  
52  
53  
54  
55  
56  
57  
58  
59  
60

1  
2  
3 treatments"[Title/Abstract] OR psychotherapy[Title/Abstract] OR psychotherapies[Title/Abstract] OR  
4 "psychotherapeutic counsel"[Title/Abstract] OR "psychotherapeutic counseling"[Title/Abstract] OR  
5 "psychotherapeutic counselling"[Title/Abstract] OR "psychotherapeutic processes"[Title/Abstract] OR  
6 "psychotherapeutic training"[Title/Abstract] OR "psychotherapeutic treatment"[Title/Abstract] OR  
7 "psychotherapeutic treatments"[Title/Abstract] OR "rational emotive"[Title/Abstract] OR "reality  
8 therapy"[Title/Abstract] OR "reality therapies"[Title/Abstract] OR "reciprocal  
9 inhibition"[Title/Abstract] OR rehabilitation[Title/Abstract] OR rehabilitating[Title/Abstract] OR  
10 "relationship therapy"[Title/Abstract] OR "relationship therapies"[Title/Abstract] OR  
11 relaxation[Title/Abstract] OR "reminiscence therapy"[Title/Abstract] OR "reminiscence  
12 therapies"[Title/Abstract] OR rogerian[Title/Abstract] OR "role play"[Title/Abstract] OR "role  
13 plays"[Title/Abstract] OR "role playing"[Title/Abstract] OR "self analysis"[Title/Abstract] OR "self  
14 analysing"[Title/Abstract] OR "self esteem"[Title/Abstract] OR "sensitivity training"[Title/Abstract] OR  
15 "sex therapy"[Title/Abstract] OR "sex therapies"[Title/Abstract] OR "sleep phase  
16 chronotherapy"[Title/Abstract] OR "sleep phase chronotherapies"[Title/Abstract] OR "social skills  
17 education"[Title/Abstract] OR "social skills training"[Title/Abstract] OR "socioenvironmental  
18 therapy"[Title/Abstract] OR "socioenvironmental therapies"[Title/Abstract] OR  
19 sociotherapy[Title/Abstract] OR sociotherapies[Title/Abstract] OR "solution focused"[Title/Abstract]  
20 OR "stress management"[Title/Abstract] OR "support group"[Title/Abstract] OR "support  
21 groups"[Title/Abstract] OR "supportive therapy"[Title/Abstract] OR "supportive  
22 therapies"[Title/Abstract] OR "systematic desensitization"[Title/Abstract] OR "systematic  
23 desensitisation"[Title/Abstract] OR "systemic therapy"[Title/Abstract] OR "systemic  
24 therapies"[Title/Abstract] OR "therapeutic community"[Title/Abstract] OR "therapeutic  
25 communities"[Title/Abstract] OR "transactional analysis"[Title/Abstract] OR  
26 transference[Title/Abstract] OR transtheoretical[Title/Abstract] OR "validation  
27 therapy"[Title/Abstract] OR "validation therapies"[Title/Abstract]) AND (((randomized controlled  
28 trial[pt]) OR (controlled clinical trial[pt]) OR (randomized[tiab]) OR (placebo[tiab]) OR (drug  
29 therapy[sh]) OR (randomly[tiab]) OR (trial[tiab]) OR (groups[tiab])) NOT (animals[mh]) NOT  
30 humans[mh]))

**PRISMA-P (Preferred Reporting Items for Systematic review and Meta-Analysis Protocols) 2015 checklist: recommended items to address in a systematic review protocol\***

| Section and topic                 | Item No | Checklist item                                                                                                                                                                                                                | Reported on page   |
|-----------------------------------|---------|-------------------------------------------------------------------------------------------------------------------------------------------------------------------------------------------------------------------------------|--------------------|
| <b>ADMINISTRATIVE INFORMATION</b> |         |                                                                                                                                                                                                                               |                    |
| Title:                            |         |                                                                                                                                                                                                                               |                    |
| Identification                    | 1a      | Identify the report as a protocol of a systematic review                                                                                                                                                                      | 1 (title)          |
| Update                            | 1b      | If the protocol is for an update of a previous systematic review, identify as such                                                                                                                                            | -                  |
| Registration                      | 2       | If registered, provide the name of the registry (such as PROSPERO) and registration number                                                                                                                                    | 2                  |
| Authors:                          |         |                                                                                                                                                                                                                               |                    |
| Contact                           | 3a      | Provide name, institutional affiliation, e-mail address of all protocol authors; provide physical mailing address of corresponding author                                                                                     | 1                  |
| Contributions                     | 3b      | Describe contributions of protocol authors and identify the guarantor of the review                                                                                                                                           | 16                 |
| Amendments                        | 4       | If the protocol represents an amendment of a previously completed or published protocol, identify as such and list changes; otherwise, state plan for documenting important protocol amendments                               | 5                  |
| Support:                          |         |                                                                                                                                                                                                                               |                    |
| Sources                           | 5a      | Indicate sources of financial or other support for the review                                                                                                                                                                 | 16-17              |
| Sponsor                           | 5b      | Provide name for the review funder and/or sponsor                                                                                                                                                                             | 16-17              |
| Role of sponsor or funder         | 5c      | Describe roles of funder(s), sponsor(s), and/or institution(s), if any, in developing the protocol                                                                                                                            | 16-17              |
| <b>INTRODUCTION</b>               |         |                                                                                                                                                                                                                               |                    |
| Rationale                         | 6       | Describe the rationale for the review in the context of what is already known                                                                                                                                                 | 3                  |
| Objectives                        | 7       | Provide an explicit statement of the question(s) the review will address with reference to participants, interventions, comparators, and outcomes (PICO)                                                                      | 5                  |
| <b>METHODS</b>                    |         |                                                                                                                                                                                                                               |                    |
| Eligibility criteria              | 8       | Specify the study characteristics (such as PICO, study design, setting, time frame) and report characteristics (such as years considered, language, publication status) to be used as criteria for eligibility for the review | 5-8                |
| Information sources               | 9       | Describe all intended information sources (such as electronic databases, contact with study authors, trial registers or other grey literature sources) with planned dates of coverage                                         | 8                  |
| Search strategy                   | 10      | Present draft of search strategy to be used for at least one electronic database, including planned limits, such that it could be repeated                                                                                    | Supplementary file |
| Study records:                    |         |                                                                                                                                                                                                                               |                    |

|                                    |     |                                                                                                                                                                                                                                                  |           |
|------------------------------------|-----|--------------------------------------------------------------------------------------------------------------------------------------------------------------------------------------------------------------------------------------------------|-----------|
| Data management                    | 11a | Describe the mechanism(s) that will be used to manage records and data throughout the review                                                                                                                                                     | 8-9       |
| Selection process                  | 11b | State the process that will be used for selecting studies (such as two independent reviewers) through each phase of the review (that is, screening, eligibility and inclusion in meta-analysis)                                                  | 8-9       |
| Data collection process            | 11c | Describe planned method of extracting data from reports (such as piloting forms, done independently, in duplicate), any processes for obtaining and confirming data from investigators                                                           | 9         |
| Data items                         | 12  | List and define all variables for which data will be sought (such as PICO items, funding sources), any pre-planned data assumptions and simplifications                                                                                          | 9         |
| Outcomes and prioritization        | 13  | List and define all outcomes for which data will be sought, including prioritization of main and additional outcomes, with rationale                                                                                                             | 7-8       |
| Risk of bias in individual studies | 14  | Describe anticipated methods for assessing risk of bias of individual studies, including whether this will be done at the outcome or study level, or both; state how this information will be used in data synthesis                             | 10        |
| Data synthesis                     | 15a | Describe criteria under which study data will be quantitatively synthesised                                                                                                                                                                      | 9         |
|                                    | 15b | If data are appropriate for quantitative synthesis, describe planned summary measures, methods of handling data and methods of combining data from studies, including any planned exploration of consistency (such as $I^2$ , Kendall's $\tau$ ) | 9, 11, 12 |
|                                    | 15c | Describe any proposed additional analyses (such as sensitivity or subgroup analyses, meta-regression)                                                                                                                                            | 12        |
|                                    | 15d | If quantitative synthesis is not appropriate, describe the type of summary planned                                                                                                                                                               | -         |
| Meta-bias(es)                      | 16  | Specify any planned assessment of meta-bias(es) (such as publication bias across studies, selective reporting within studies)                                                                                                                    | 12, 13    |
| Confidence in cumulative evidence  | 17  | Describe how the strength of the body of evidence will be assessed (such as GRADE)                                                                                                                                                               | 13        |

**\* It is strongly recommended that this checklist be read in conjunction with the PRISMA-P Explanation and Elaboration (cite when available) for important clarification on the items. Amendments to a review protocol should be tracked and dated. The copyright for PRISMA-P (including checklist) is held by the PRISMA-P Group and is distributed under a Creative Commons Attribution Licence 4.0.**

*From: Shamseer L, Moher D, Clarke M, Ghersi D, Liberati A, Petticrew M, Shekelle P, Stewart L, PRISMA-P Group. Preferred reporting items for systematic review and meta-analysis protocols (PRISMA-P) 2015: elaboration and explanation. BMJ. 2015 Jan 2;349(jan02 1):g7647.*
