# Supplementary material for: Psychological interventions for positive symptoms in schizophrenia: protocol for a network meta-analysis of randomised controlled trials
Source: PubMed Central journal article supplement — BMJ Open. 2018 Mar 14;8(3):e019280. doi: 10.1136/bmjopen-2017-019280 (PMC5857696; doi:10.1136/bmjopen-2017-019280), 2018-03-14
Supplement: bmjopen-2017-019280supp001.pdf [file bmjopen-2017-019280supp001.pdf]

## Search terms for Pubmed

("Schizophrenia"[Mesh] OR "Paranoid Disorders"[Mesh] OR schizo\*[Title/Abstract] OR psychotic\*[Title/Abstract] OR psychosis[Title/Abstract] OR psychoses[Title/Abstract]) AND ("Psychotherapy"[Mesh] or "Behavior Therapy"[Mesh] or "Cognitive Therapy"[Mesh] or "Complementary Therapies"[Mesh] or "Psychoanalysis"[Mesh] or "Counseling"[Mesh] or "Hypnosis"[Mesh] or "Association"[Mesh] or "Association Learning"[Mesh] OR abreaction[Title/Abstract] OR "acceptance[Title/Abstract] AND commitment therapy"[Title/Abstract] OR "acting out"[Title/Abstract] OR adlerian[Title/Abstract] OR "analytical psychotherapy"[Title/Abstract] OR "analytical psychotherapies"[Title/Abstract] OR "anger control"[Title/Abstract] OR "anger management"[Title/Abstract] OR "animal therapy"[Title/Abstract] OR "animal therapies"[Title/Abstract] OR "art therapy"[Title/Abstract] OR "art therapies"[Title/Abstract] OR "assertive training"[Title/Abstract] OR "assertiveness training"[Title/Abstract] OR "attention training technique"[Title/Abstract] OR "autogenic training"[Title/Abstract] OR autosuggestion[Title/Abstract] OR "aversion therapy"[Title/Abstract] OR "aversion therapies"[Title/Abstract] OR "balint group"[Title/Abstract] OR befriending[Title/Abstract] OR "behavior contracting"[Title/Abstract] OR "behavior modification"[Title/Abstract] OR "behavior regulation"[Title/Abstract] OR "behavior therapy"[Title/Abstract] OR "behavior therapies"[Title/Abstract] OR "behaviour contracting"[Title/Abstract] OR "behaviour modification"[Title/Abstract] OR "behaviour regulation"[Title/Abstract] OR "behaviour therapy"[Title/Abstract] OR "behaviour therapies"[Title/Abstract] OR bibliotherapy[Title/Abstract] OR bibliotherapies[Title/Abstract] OR biofeedback[Title/Abstract] OR "body psychotherapy"[Title/Abstract] OR "body psychotherapies"[Title/Abstract] OR "brief psychotherapy"[Title/Abstract] OR "brief psychotherapies"[Title/Abstract] OR "caregiver support"[Title/Abstract] OR cbt[Title/Abstract] OR "client centre"[Title/Abstract] OR "client center"[Title/Abstract] OR "cognitive behavior"[Title/Abstract] OR "cognitive behavioral"[Title/Abstract] OR "cognitive intervention"[Title/Abstract] OR "cognitive interventions"[Title/Abstract] OR "cognitive rehabilitation"[Title/Abstract] OR "cognitive remediation"[Title/Abstract] OR "cognitive technique"[Title/Abstract] OR "cognitive techniques"[Title/Abstract] OR "cognitive therapy"[Title/Abstract] OR "cognitive therapies"[Title/Abstract] OR "cognitive treatment"[Title/Abstract] OR "cognitive treatments"[Title/Abstract] OR "color therapy"[Title/Abstract] OR "color therapies"[Title/Abstract] OR "colour therapy"[Title/Abstract] OR "colour therapies"[Title/Abstract] OR "compassionate mind training"[Title/Abstract] OR "conjoint therapy"[Title/Abstract] OR "conjoint therapies"[Title/Abstract] OR "contingency management"[Title/Abstract] OR "conversational therapy"[Title/Abstract] OR "conversational therapies"[Title/Abstract] OR "conversion therapy"[Title/Abstract] OR "conversion therapies"[Title/Abstract] OR "coping skills"[Title/Abstract] OR counseling[Title/Abstract] OR counselling[Title/Abstract] OR countertransference[Title/Abstract] OR "couples therapy"[Title/Abstract] OR "couples therapies"[Title/Abstract] OR "covert sensitization"[Title/Abstract] OR "covert sensitisation"[Title/Abstract] OR "crisis intervention"[Title/Abstract] OR "dance therapy"[Title/Abstract] OR "dance therapies"[Title/Abstract] OR dialectic[Title/Abstract] OR dialectical[Title/Abstract] OR "dream analysis"[Title/Abstract] OR eclectic[Title/Abstract] OR "emotion focused"[Title/Abstract] OR "emotionally focused"[Title/Abstract] OR "emotional freedom technique"[Title/Abstract] OR "encounter group therapy"[Title/Abstract] OR "encounter group therapies"[Title/Abstract] OR "existential therapy"[Title/Abstract] OR "existential therapies"[Title/Abstract] OR "experiential

psychotherapy"[Title/Abstract] OR "experiential psychotherapies"[Title/Abstract] OR "exposure therapy"[Title/Abstract] OR "exposure therapies"[Title/Abstract] OR "expressive psychotherapy"[Title/Abstract] OR "expressive psychotherapies"[Title/Abstract] OR "eye movement desensitization"[Title/Abstract] OR "eye movement desensitisation"[Title/Abstract] OR "family intervention"[Title/Abstract] OR "family interventions"[Title/Abstract] OR "family therapy"[Title/Abstract] OR "family therapies"[Title/Abstract] OR "feminist therapy"[Title/Abstract] OR "feminist therapies"[Title/Abstract] OR "free association"[Title/Abstract] OR freudian"[Title/Abstract] OR "geriatric psychotherapy"[Title/Abstract] OR "geriatric psychotherapies"[Title/Abstract] OR "gestalt therapy"[Title/Abstract] OR "gestalt therapies"[Title/Abstract] OR griefwork"[Title/Abstract] OR "group intervention"[Title/Abstract] OR "group interventions"[Title/Abstract] OR "group psychotherapy"[Title/Abstract] OR "group psychotherapies"[Title/Abstract] OR "group therapy"[Title/Abstract] OR "group therapies"[Title/Abstract] OR "guided imagery"[Title/Abstract] OR "holistic psychotherapy"[Title/Abstract] OR "holistic psychotherapies"[Title/Abstract] OR "humanistic psychotherapy"[Title/Abstract] OR "humanistic psychotherapies"[Title/Abstract] OR hypnosis"[Title/Abstract] OR hypnotherapy"[Title/Abstract] OR hypnotherapies"[Title/Abstract] OR hypnotizability"[Title/Abstract] OR hypnotisability"[Title/Abstract] OR imagery"[Title/Abstract] OR "implosive therapy"[Title/Abstract] OR "implosive therapies"[Title/Abstract] OR "individual psychotherapy"[Title/Abstract] OR "individual psychotherapies"[Title/Abstract] OR "insight therapy"[Title/Abstract] OR "insight therapies"[Title/Abstract] OR "integrated psychological therapy"[Title/Abstract] OR "integrative psychotherapy"[Title/Abstract] OR "integrative psychotherapies"[Title/Abstract] OR "integrative therapy"[Title/Abstract] OR "integrative therapies"[Title/Abstract] OR interpersonal"[Title/Abstract] OR jungian"[Title/Abstract] OR kleinian"[Title/Abstract] OR logotherapy"[Title/Abstract] OR logotherapies"[Title/Abstract] OR "marathon group therapy"[Title/Abstract] OR "marathon group therapies"[Title/Abstract] OR "marital therapy"[Title/Abstract] OR "marital therapies"[Title/Abstract] OR meditation"[Title/Abstract] OR "mental healing"[Title/Abstract] OR "metacognitive therapy"[Title/Abstract] OR "metacognitive therapies"[Title/Abstract] OR "metacognitive training"[Title/Abstract] OR "milieu therapy"[Title/Abstract] OR "milieu therapies"[Title/Abstract] OR mindfulness"[Title/Abstract] OR "morita therapy"[Title/Abstract] OR "morita therapies"[Title/Abstract] OR multimodal"[Title/Abstract] OR "music therapy"[Title/Abstract] OR "music therapies"[Title/Abstract] OR "narrative therapy"[Title/Abstract] OR "narrative therapies"[Title/Abstract] OR "nondirective therapy"[Title/Abstract] OR "nondirective therapies"[Title/Abstract] OR "object relations"[Title/Abstract] OR "person centred therapy"[Title/Abstract] OR "person centred therapies"[Title/Abstract] OR "person centered therapy"[Title/Abstract] OR "person centered therapies"[Title/Abstract] OR "personal construct therapy"[Title/Abstract] OR "personal construct therapies"[Title/Abstract] OR "persuasion therapy"[Title/Abstract] OR "persuasion therapies"[Title/Abstract] OR "pet therapy"[Title/Abstract] OR "pet therapies"[Title/Abstract] OR "play therapy"[Title/Abstract] OR "play therapies"[Title/Abstract] OR "primal therapy"[Title/Abstract] OR "primal therapies"[Title/Abstract] OR "problem solving"[Title/Abstract] OR psychoanalyse"[Title/Abstract] OR psychoanalysed"[Title/Abstract] OR psychoanalysis"[Title/Abstract] OR psychoanalytic"[Title/Abstract] OR psychodrama"[Title/Abstract] OR psychodynamic"[Title/Abstract] OR psychoeducate"[Title/Abstract] OR psychoeducation"[Title/Abstract] OR psychoeducating"[Title/Abstract] OR psychologic"[Title/Abstract] OR psychological"[Title/Abstract] OR psychologically"[Title/Abstract] OR "psychological therapy"[Title/Abstract] OR "psychological therapies"[Title/Abstract] OR "psychosocial treatment"[Title/Abstract] OR "psychosocial

treatments"[Title/Abstract] OR psychotherapy[Title/Abstract] OR psychotherapies[Title/Abstract] OR "psychotherapeutic counsel"[Title/Abstract] OR "psychotherapeutic counseling"[Title/Abstract] OR "psychotherapeutic counselling"[Title/Abstract] OR "psychotherapeutic processes"[Title/Abstract] OR "psychotherapeutic training"[Title/Abstract] OR "psychotherapeutic treatment"[Title/Abstract] OR "psychotherapeutic treatments"[Title/Abstract] OR "rational emotive"[Title/Abstract] OR "reality therapy"[Title/Abstract] OR "reality therapies"[Title/Abstract] OR "reciprocal inhibition"[Title/Abstract] OR rehabilitation[Title/Abstract] OR rehabilitating[Title/Abstract] OR "relationship therapy"[Title/Abstract] OR "relationship therapies"[Title/Abstract] OR relaxation[Title/Abstract] OR "reminiscence therapy"[Title/Abstract] OR "reminiscence therapies"[Title/Abstract] OR rogerian[Title/Abstract] OR "role play"[Title/Abstract] OR "role plays"[Title/Abstract] OR "role playing"[Title/Abstract] OR "self analysis"[Title/Abstract] OR "self analysing"[Title/Abstract] OR "self esteem"[Title/Abstract] OR "sensitivity training"[Title/Abstract] OR "sex therapy"[Title/Abstract] OR "sex therapies"[Title/Abstract] OR "sleep phase chronotherapy"[Title/Abstract] OR "sleep phase chronotherapies"[Title/Abstract] OR "social skills education"[Title/Abstract] OR "social skills training"[Title/Abstract] OR "socioenvironmental therapy"[Title/Abstract] OR "socioenvironmental therapies"[Title/Abstract] OR sociotherapy[Title/Abstract] OR sociotherapies[Title/Abstract] OR "solution focused"[Title/Abstract] OR "stress management"[Title/Abstract] OR "support group"[Title/Abstract] OR "support groups"[Title/Abstract] OR "supportive therapy"[Title/Abstract] OR "supportive therapies"[Title/Abstract] OR "systematic desensitization"[Title/Abstract] OR "systematic desensitisation"[Title/Abstract] OR "systemic therapy"[Title/Abstract] OR "systemic therapies"[Title/Abstract] OR "therapeutic community"[Title/Abstract] OR "therapeutic communities"[Title/Abstract] OR "transactional analysis"[Title/Abstract] OR transference[Title/Abstract] OR transtheoretical[Title/Abstract] OR "validation therapy"[Title/Abstract] OR "validation therapies"[Title/Abstract]) AND (((randomized controlled trial[pt]) OR (controlled clinical trial[pt]) OR (randomized[tiab]) OR (placebo[tiab]) OR (drug therapy[sh]) OR (randomly[tiab]) OR (trial[tiab]) OR (groups[tiab])) NOT (animals[mh]) NOT humans[mh]))
